# Supplementary material for: Improving Methanol Utilization by Reducing Alcohol Oxidase Activity and Adding Co-Substrate of Sodium Citrate in Pichia pastoris
Source: MDPI journal article supplement (doi:10.3390/jof9040422), 2023-03-29
Supplement: s1 [file s1]

**Supplementary Table S1 Differentially expressed genes identified by RNA-seq**

| Gene name       | Gene description                                                                                                    | Log2FC(A1_464/WT) | Padjust  | Regulate |
|-----------------|---------------------------------------------------------------------------------------------------------------------|-------------------|----------|----------|
| PAS_FragB_0004  | Small nuclear ribonucleoprotein G                                                                                   | 1.007009          | 3.22E-17 | up       |
| PAS_FragB_0009  | H subunit of the mitochondrial glycine decarboxylase complex                                                        | 1.014027          | 4.73E-33 | up       |
| PAS_FragB_0014  | Mitochondrial DNA replication protein                                                                               | 0.665449          | 7.51E-13 | up       |
| PAS_FragB_0018  | Hypothetical protein                                                                                                | 0.805499          | 0.070077 | up       |
| PAS_FragB_0023  | Vitamin H transporter 1                                                                                             | 0.954501          | 4.31E-09 | up       |
| PAS_FragB_0029  | hypothetical protein                                                                                                | 0.849313          | 1.69E-22 | up       |
| PAS_FragB_0039  | DNA-dependent ATPase                                                                                                | 0.91668           | 2.29E-18 | up       |
| PAS_FragB_0041  | hypothetical protein                                                                                                | 0.673143          | 6.23E-14 | up       |
| PAS_FragB_0042  | Adrenodoxin homolog, mitochondrial                                                                                  | 0.748243          | 7.09E-08 | up       |
| PAS_FragB_0048  | Protein ROT1                                                                                                        | 1.016748          | 5.56E-24 | up       |
| PAS_FragB_0050  | Uncharacterized transporter                                                                                         | 1.474097          | 7.56E-28 | up       |
| PAS_FragB_0051  | Hypothetical protein                                                                                                | 1.085757          | 8.01E-17 | up       |
| PAS_FragB_0052  | Translational elongation factor EF-1 alpha                                                                          | 1.149689          | 5.37E-43 | up       |
| PAS_FragB_0054  | WD repeat-containing protein                                                                                        | 0.921295          | 3.26E-15 | up       |
| PAS_FragB_0055  | ubiquitin-conjugating enzyme                                                                                        | 0.63512           | 2.81E-06 | up       |
| PAS_FragB_0074  | hypothetical protein                                                                                                | 1.173946          | 2.77E-37 | up       |
| PAS_FragD_0020  | Hypothetical protein                                                                                                | 0.641126          | 3.50E-11 | up       |
| PAS_FragD_0024  | Vacuolar H <sup>+</sup> /Ca <sup>2+</sup> exchanger involved in control of cytosolic Ca <sup>2+</sup> concentration | 0.774729          | 2.22E-20 | up       |
| PAS_FragD_0025  | G1 cyclin, associates with Pho85p cyclin-dependent kinase (Cdk)                                                     | 0.836422          | 5.04E-16 | up       |
| PAS_c121_0012   | Hypothetical protein                                                                                                | 0.726047          | 2.49E-13 | up       |
| PAS_c121_0014   | mitochondrial 54S ribosomal protein YmL28                                                                           | 1.118668          | 9.05E-14 | up       |
| PAS_c131_0011   | 60S ribosomal protein L14                                                                                           | 0.654512          | 4.83E-17 | up       |
| PAS_chr1-1_0002 | Plasma membrane H <sup>+</sup> -ATPase, pumps protons out of the cell                                               | 0.724581          | 3.43E-19 | up       |
| PAS_chr1-1_0028 | Glycerol proton symporter of the plasma membrane, subject to glucose-induced inactivation                           | 0.79819           | 8.89E-12 | up       |
| PAS_chr1-1_0037 | Hypothetical protein                                                                                                | 0.824553          | 3.63E-21 | up       |
| PAS_chr1-1_0049 | Ribonuclease H2 catalytic subunit, removes RNA primers during Okazaki fragment synthesis                            | 0.892167          | 1.32E-17 | up       |
| PAS_chr1-1_0050 | Dihydrolipoamide acetyltransferase component (E2) of pyruvate dehydrogenase complex                                 | 0.842026          | 8.07E-21 | up       |
| PAS_chr1-1_0072 | Fructose 1,6-bisphosphate aldolase, required for glycolysis and gluconeogenesis                                     | 0.733655          | 5.93E-25 | up       |
| PAS_chr1-1_0076 | 40S ribosomal protein S22                                                                                           | 0.68876           | 2.26E-05 | up       |
| PAS_chr1-1_0085 | Hypothetical protein                                                                                                | 1.596055          | 1.68E-14 | up       |
| PAS_chr1-1_0099 | Core subunit of the ubiquinol-cytochrome c reductase complex (bc1 complex)                                          | 0.818936          | 4.37E-22 | up       |
| PAS_chr1-1_0107 | NADP(+)-dependent glutamate dehydrogenase                                                                           | 0.709067          | 1.28E-20 | up       |
| PAS_chr1-1_0111 | Protein involved in negative regulation of transcription of iron regulon                                            | 0.728506          | 1.31E-17 | up       |
| PAS_chr1-1_0118 | Hypothetical protein                                                                                                | 0.595127          | 5.84E-15 | up       |
| PAS_chr1-1_0123 | Putative sensor/transporter protein involved in cell wall biogenesis                                                | 0.643101          | 1.26E-12 | up       |
| PAS_chr1-1_0126 | Hypothetical protein                                                                                                | 0.644746          | 1.35E-05 | up       |
| PAS_chr1-1_0127 | Hypothetical protein                                                                                                | 1.208273          | 2.01E-36 | up       |
| PAS_chr1-1_0129 | Putative protein of unknown function                                                                                | 0.595971          | 6.65E-15 | up       |
| PAS_chr1-1_0130 | Daughter cell-specific secreted protein with similarity to glucanases, endo-1,3-beta-glucanase                      | 0.624163          | 9.09E-11 | up       |
| PAS_chr1-1_0132 | Purine nucleoside phosphorylase, specifically metabolizes inosine & guanosine nucleosides                           | 0.905213          | 1.26E-23 | up       |
| PAS_chr1-1_0135 | Hypothetical protein                                                                                                | 0.616349          | 1.73E-07 | up       |
| PAS_chr1-1_0137 | Hypothetical protein                                                                                                | 0.708184          | 0.056009 | up       |
| PAS_chr1-1_0141 | Non-essential protein of unknown function                                                                           | 0.745679          | 8.15E-14 | up       |
| PAS_chr1-1_0157 | Protein of unknown function, expression is sensitive to nitrogen catabolite repression                              | 1.010511          | 5.46E-29 | up       |

|                 |                                                                                             |          |          |    |
|-----------------|---------------------------------------------------------------------------------------------|----------|----------|----|
| PAS_chr1-1_0158 | Putative transmembrane protein involved in export of ammonia, a starvation signal           | 0.962978 | 2.93E-19 | up |
| PAS_chr1-1_0159 | Protein of unknown function, required for normal localization of actin patches              | 0.866751 | 3.49E-21 | up |
| PAS_chr1-1_0169 | Protein required for the ubiquinone (Coenzyme Q) biosynthesis                               | 0.651011 | 7.58E-14 | up |
| PAS_chr1-1_0176 | Putative FAD transporter                                                                    | 0.619806 | 1.12E-10 | up |
| PAS_chr1-1_0180 | GTPase; GTP-binding protein of the ARF family, component of COPII coat of vesicles          | 0.829514 | 1.19E-26 | up |
| PAS_chr1-1_0183 | 60S ribosomal protein L1                                                                    | 1.330829 | 2.06E-49 | up |
| PAS_chr1-1_0189 | 60S ribosomal protein L12                                                                   | 1.367465 | 6.46E-45 | up |
| PAS_chr1-1_0191 | Subunit 5 of the stator stalk of mitochondrial F1F0 ATP synthase                            | 0.676772 | 5.18E-17 | up |
| PAS_chr1-1_0198 | Hypothetical protein                                                                        | 0.984007 | 1.64E-22 | up |
| PAS_chr1-1_0200 | Cytosolic aspartate aminotransferase; involved in nitrogen metabolism                       | 0.844364 | 1.46E-22 | up |
| PAS_chr1-1_0201 | G protein beta subunit, forms a dimer with Ste18p to activate the mating signaling pathway  | 0.683762 | 1.76E-08 | up |
| PAS_chr1-1_0216 | 60S ribosomal protein L8                                                                    | 1.095821 | 4.56E-34 | up |
| PAS_chr1-1_0219 | 60S ribosomal protein L2                                                                    | 1.333702 | 1.79E-50 | up |
| PAS_chr1-1_0221 | Low affinity methionine permease, similar to Mup1p                                          | 0.832369 | 6.02E-21 | up |
| PAS_chr1-1_0231 | Putative protein of unknown function                                                        | 0.706049 | 5.36E-10 | up |
| PAS_chr1-1_0233 | Mitochondrial NADP-specific isocitrate dehydrogenase, catalyzes the oxidation of isocitrate | 0.770809 | 1.94E-19 | up |
| PAS_chr1-1_0252 | Hypothetical protein                                                                        | 0.661845 | 5.55E-13 | up |
| PAS_chr1-1_0257 | Hypothetical protein                                                                        | 0.997228 | 1.78E-30 | up |
| PAS_chr1-1_0267 | Peptidyl-prolyl cis-trans isomerase (cyclophilin) of the endoplasmic reticulum              | 1.007962 | 5.01E-29 | up |
| PAS_chr1-1_0274 | Catalytic subunit of the mitochondrial inner membrane peptidase complex                     | 0.718464 | 1.48E-06 | up |
| PAS_chr1-1_0292 | Protein involved in rRNA processing                                                         | 0.633472 | 1.84E-10 | up |
| PAS_chr1-1_0293 | Cell wall protein that functions in the transfer of chitin to beta(1-6)glucan               | 0.660287 | 8.66E-16 | up |
| PAS_chr1-1_0305 | Rho GDP dissociation inhibitor involved in the localization and regulation of Cdc42p        | 0.633709 | 2.00E-10 | up |
| PAS_chr1-1_0309 | Vacuolar ATPase V1 domain subunit A containing the catalytic nucleotide binding sites       | 0.746844 | 5.94E-17 | up |
| PAS_chr1-1_0345 | 60S ribosomal protein L5                                                                    | 0.960136 | 2.93E-25 | up |
| PAS_chr1-1_0347 | Hypothetical protein                                                                        | 1.098655 | 0.020597 | up |
| PAS_chr1-1_0371 | Transcription factor (bHLH) involved in interorganelle communication                        | 0.835919 | 2.00E-11 | up |
| PAS_chr1-1_0401 | Mitochondrial protein, putative inner membrane transporter                                  | 0.834015 | 4.85E-12 | up |
| PAS_chr1-1_0410 | Vacuolar ATPase assembly integral membrane protein VMA21                                    | 1.206226 | 2.93E-06 | up |
| PAS_chr1-1_0417 | Putative transmembrane protein involved in export of ammonia                                | 0.88664  | 8.31E-25 | up |
| PAS_chr1-1_0418 | Acetate transporter required for normal sporulation                                         | 1.156211 | 3.99E-23 | up |
| PAS_chr1-1_0432 | Acetohydroxyacid reductoisomerase                                                           | 0.796501 | 7.57E-21 | up |
| PAS_chr1-1_0433 | Mitochondrial peroxiredoxin (1-Cys Prx) with thioredoxin peroxidase activity                | 0.880485 | 4.43E-28 | up |
| PAS_chr1-1_0439 | 40S ribosomal protein S8                                                                    | 0.592496 | 1.61E-16 | up |
| PAS_chr1-1_0459 | Dolichol-phosphate mannosyltransferase                                                      | 0.764069 | 3.65E-21 | up |
| PAS_chr1-1_0461 | hypothetical protein                                                                        | 0.706605 | 3.11E-13 | up |
| PAS_chr1-1_0475 | hypothetical protein                                                                        | 0.99958  | 5.30E-31 | up |
| PAS_chr1-1_0479 | hypothetical protein                                                                        | 0.645947 | 4.35E-16 | up |
| PAS_chr1-1_0482 | hypothetical protein                                                                        | 0.85606  | 2.07E-18 | up |
| PAS_chr1-1_0484 | hypothetical protein                                                                        | 1.399526 | 2.48E-38 | up |
| PAS_chr1-1_0496 | hypothetical protein                                                                        | 0.801687 | 7.86E-10 | up |
| PAS_chr1-3_0004 | Hexose transporter with moderate affinity for glucose                                       | 0.618043 | 1.35E-06 | up |
| PAS_chr1-3_0011 | Putative transporter, member of the sugar porter family                                     | 0.968964 | 6.82E-25 | up |
| PAS_chr1-3_0016 | Multifunctional enzyme of the peroxisomal fatty acid beta-oxidation pathway                 | 0.790733 | 8.47E-10 | up |
| PAS_chr1-3_0024 | Succinate semialdehyde dehydrogenase                                                        | 0.957622 | 2.31E-28 | up |

|                 |                                                                                                      |          |          |    |
|-----------------|------------------------------------------------------------------------------------------------------|----------|----------|----|
| PAS_chr1-3_0027 | Protein of unknown function, expression is regulated by phosphate levels                             | 1.220137 | 1.42E-32 | up |
| PAS_chr1-3_0028 | Cytoplasmic inorganic pyrophosphatase (PPase)                                                        | 1.115389 | 8.23E-37 | up |
| PAS_chr1-3_0034 | 60S ribosomal protein L4                                                                             | 1.159051 | 1.11E-35 | up |
| PAS_chr1-3_0059 | Uracil permease, localized to the plasma membrane                                                    | 0.880994 | 2.36E-25 | up |
| PAS_chr1-3_0068 | 60S acidic ribosomal protein P0                                                                      | 1.175524 | 6.50E-45 | up |
| PAS_chr1-3_0070 | Mitochondrial inorganic pyrophosphatase                                                              | 0.718134 | 5.11E-17 | up |
| PAS_chr1-3_0075 | Hypothetical protein                                                                                 | 1.038597 | 1.20E-18 | up |
| PAS_chr1-3_0077 | Nuclear protein of unknown function                                                                  | 0.866797 | 6.15E-21 | up |
| PAS_chr1-3_0104 | Aconitase, required for the tricarboxylic acid (TCA) cycle and also independently required for mitoc | 0.964765 | 3.08E-28 | up |
| PAS_chr1-3_0113 | Small rho-like GTPase, essential for establishment and maintenance of cell polarity                  | 0.833201 | 7.07E-15 | up |
| PAS_chr1-3_0115 | 40S ribosomal protein S3                                                                             | 0.987901 | 5.52E-27 | up |
| PAS_chr1-3_0116 | Endoplasmic reticulum packaging chaperone                                                            | 0.626392 | 4.57E-15 | up |
| PAS_chr1-3_0117 | Hypothetical protein                                                                                 | 1.092754 | 2.81E-17 | up |
| PAS_chr1-3_0120 | Hypothetical protein                                                                                 | 0.646502 | 0.001337 | up |
| PAS_chr1-3_0141 | Protein with a role in cellular adhesion and filamentous growth                                      | 0.59202  | 1.10E-07 | up |
| PAS_chr1-3_0146 | Hypothetical protein                                                                                 | 0.665816 | 1.42E-06 | up |
| PAS_chr1-3_0149 | Transmembrane osmosensor                                                                             | 1.039675 | 5.10E-21 | up |
| PAS_chr1-3_0153 | Plasma membrane pyridoxine (vitamin B6) transporter                                                  | 1.189058 | 5.49E-26 | up |
| PAS_chr1-3_0162 | Highly conserved, iron-sulfur cluster binding protein localized in the cytoplasm                     | 0.775709 | 8.19E-11 | up |
| PAS_chr1-3_0163 | Uridine diphosphate-N-acetylglucosamine (UDP-GlcNAc) transporter                                     | 0.918906 | 6.03E-13 | up |
| PAS_chr1-3_0164 | Putative protein of unknown function                                                                 | 0.73053  | 2.67E-07 | up |
| PAS_chr1-3_0166 | Hypothetical protein                                                                                 | 0.716509 | 7.78E-17 | up |
| PAS_chr1-3_0170 | Zinc-finger DNA-binding protein                                                                      | 0.790579 | 1.77E-05 | up |
| PAS_chr1-3_0172 | Subunit beta1 of the nascent polypeptide-associated complex (NAC) involved in protein targeting      | 0.58545  | 1.66E-14 | up |
| PAS_chr1-3_0186 | Putative protein, predicted to be an alpha-isopropylmalate carrier                                   | 0.872878 | 1.15E-09 | up |
| PAS_chr1-3_0191 | GMP synthase, an enzyme that catalyzes the second step in the biosynthesis of GMP from IMP           | 1.190074 | 2.53E-34 | up |
| PAS_chr1-3_0194 | Heme A:farnesyltransferase                                                                           | 0.689446 | 3.49E-08 | up |
| PAS_chr1-3_0202 | Essential subunit of Sec61 complex (Sec61p, Sbh1p, and Ssl1p)                                        | 0.854822 | 6.24E-21 | up |
| PAS_chr1-3_0206 | Permease of basic amino acids in the vacuolar membrane                                               | 0.599762 | 1.36E-07 | up |
| PAS_chr1-3_0208 | Mitochondrial peripheral inner membrane protein                                                      | 0.636568 | 6.39E-09 | up |
| PAS_chr1-3_0226 | Beta-1,3-glucanosyltransferase, required for cell wall assembly                                      | 0.828314 | 8.18E-18 | up |
| PAS_chr1-3_0227 | Beta-1,3-glucanosyltransferase, required for cell wall assembly                                      | 0.817231 | 8.57E-21 | up |
| PAS_chr1-3_0229 | Cell wall protein with similarity to glucanases                                                      | 1.195984 | 2.29E-36 | up |
| PAS_chr1-3_0230 | ER membrane protein that interacts with exocyst subunit Sec6p and with Yip3p                         | 0.930316 | 1.49E-25 | up |
| PAS_chr1-3_0249 | Hypothetical protein                                                                                 | 0.849597 | 2.02E-16 | up |
| PAS_chr1-3_0250 | Mitochondrial carrier protein involved in the accumulation of CoA in the mitochondrial matrix        | 0.80261  | 1.06E-15 | up |
| PAS_chr1-3_0256 | Hypothetical protein                                                                                 | 1.078426 | 1.06E-18 | up |
| PAS_chr1-3_0264 | Cytoplasmic peptidyl-prolyl cis-trans isomerase (cyclophilin)                                        | 1.128444 | 5.80E-36 | up |
| PAS_chr1-3_0276 | Mucin family member                                                                                  | 0.721486 | 5.49E-11 | up |
| PAS_chr1-3_0300 | 60S ribosomal protein L23                                                                            | 0.610911 | 1.29E-15 | up |
| PAS_chr1-3_0301 | hypothetical protein                                                                                 | 0.852991 | 1.31E-20 | up |
| PAS_chr1-4_0027 | Cofilin, promotes actin filament depolarization in a pH-dependent manner                             | 0.820692 | 1.15E-27 | up |
| PAS_chr1-4_0043 | Co-chaperone that binds to and regulates Hsp90 family chaperones                                     | 0.636475 | 1.53E-14 | up |
| PAS_chr1-4_0045 | RNA binding protein with similarity to hnRNP-K that localizes to the cytoplasm and subtelomeric DNA  | 0.610794 | 1.51E-16 | up |
| PAS_chr1-4_0049 | Homoserine dehydrogenase (L-homoserine:NADP oxidoreductase), dimeric enzyme                          | 0.755418 | 2.03E-18 | up |

|                 |                                                                                                                                                               |          |          |    |
|-----------------|---------------------------------------------------------------------------------------------------------------------------------------------------------------|----------|----------|----|
| PAS_chr1-4_0055 | Clavamate synthase                                                                                                                                            | 0.858522 | 4.92E-22 | up |
| PAS_chr1-4_0057 | Protein of unknown function, required for growth on glycerol as a carbon source                                                                               | 0.632689 | 1.92E-10 | up |
| PAS_chr1-4_0063 | G-protein beta subunit and guanine nucleotide dissociation inhibitor for Gpa2p                                                                                | 1.184743 | 2.82E-42 | up |
| PAS_chr1-4_0086 | Hypothetical protein                                                                                                                                          | 0.875806 | 2.76E-18 | up |
| PAS_chr1-4_0116 | Hypothetical protein                                                                                                                                          | 0.652145 | 4.30E-08 | up |
| PAS_chr1-4_0126 | Palmitoyltransferase for Vac8p, required for vacuolar membrane fusion                                                                                         | 0.77641  | 3.58E-10 | up |
| PAS_chr1-4_0150 | Transketolase, similar to Tkl2p                                                                                                                               | 0.876892 | 9.84E-21 | up |
| PAS_chr1-4_0151 | Protein phosphotyrosine phosphatase                                                                                                                           | 0.702901 | 2.09E-12 | up |
| PAS_chr1-4_0163 | Putative protein of unknown function                                                                                                                          | 1.089674 | 1.28E-24 | up |
| PAS_chr1-4_0164 | Protein of unknown function, has similarity to Pry1p and Pry3p                                                                                                | 0.746361 | 1.57E-16 | up |
| PAS_chr1-4_0167 | Putative protein of unknown function                                                                                                                          | 0.910796 | 3.63E-21 | up |
| PAS_chr1-4_0168 | hypothetical protein                                                                                                                                          | 0.685898 | 6.39E-14 | up |
| PAS_chr1-4_0207 | Hydroperoxide and superoxide-radical responsive glutathione-dependent oxidoreductase                                                                          | 0.735618 | 9.61E-16 | up |
| PAS_chr1-4_0208 | RNA helicase in the DEAH-box family involved in the second catalytic step of splicing, exhibits ATP-RNA binding protein that negatively regulates growth rate | 0.891921 | 2.97E-22 | up |
| PAS_chr1-4_0223 | ER-derived vesicles protein ERV14                                                                                                                             | 0.730558 | 4.44E-13 | up |
| PAS_chr1-4_0225 | ER-derived vesicles protein ERV14                                                                                                                             | 0.691388 | 7.21E-10 | up |
| PAS_chr1-4_0242 | Putative mannosidase, GPI-anchored membrane protein                                                                                                           | 0.955737 | 1.07E-27 | up |
| PAS_chr1-4_0243 | Threonine deaminase, catalyzes the first step in isoleucine biosynthesis                                                                                      | 0.605219 | 6.92E-08 | up |
| PAS_chr1-4_0246 | Divalent metal ion transporter involved in manganese homeostasis                                                                                              | 0.637679 | 5.98E-08 | up |
| PAS_chr1-4_0248 | Essential protein of the mitochondrial inner membrane, component of the mitochondrial import system                                                           | 1.038436 | 2.78E-25 | up |
| PAS_chr1-4_0251 | Putative protein of unknown function                                                                                                                          | 0.671754 | 0.000855 | up |
| PAS_chr1-4_0253 | ATP sulfurylase, catalyzes the primary step of intracellular sulfate activation                                                                               | 1.282791 | 1.10E-40 | up |
| PAS_chr1-4_0257 | Protein with similarity to mammalian monocarboxylate permeases                                                                                                | 0.692937 | 4.33E-09 | up |
| PAS_chr1-4_0260 | Hypothetical protein                                                                                                                                          | 0.712549 | 3.73E-12 | up |
| PAS_chr1-4_0261 | Hypothetical protein                                                                                                                                          | 0.674785 | 0.001239 | up |
| PAS_chr1-4_0264 | Phosphoglucomutase                                                                                                                                            | 0.847256 | 6.90E-26 | up |
| PAS_chr1-4_0270 | Hypothetical protein                                                                                                                                          | 0.815299 | 7.58E-14 | up |
| PAS_chr1-4_0276 | WD-repeat protein involved in ribosome biogenesis                                                                                                             | 0.727534 | 3.79E-12 | up |
| PAS_chr1-4_0290 | Hypothetical protein                                                                                                                                          | 0.638094 | 6.66E-08 | up |
| PAS_chr1-4_0292 | 3-phosphoglycerate kinase                                                                                                                                     | 0.798834 | 2.60E-26 | up |
| PAS_chr1-4_0297 | Suppressor protein STM1                                                                                                                                       | 0.854605 | 3.02E-26 | up |
| PAS_chr1-4_0299 | Mitochondrial external NADH dehydrogenase, a type II NAD(P)H:quinone oxidoreductase                                                                           | 1.09372  | 4.71E-36 | up |
| PAS_chr1-4_0301 | Hypothetical protein                                                                                                                                          | 0.699413 | 2.04E-06 | up |
| PAS_chr1-4_0304 | Acetyl-CoA C-acetyltransferase (acetoacetyl-CoA thiolase), cytosolic enzyme                                                                                   | 0.839695 | 8.54E-23 | up |
| PAS_chr1-4_0340 | ADP-ribosylation factor (ARF) GTPase activating protein (GAP) effector                                                                                        | 0.645011 | 2.09E-08 | up |
| PAS_chr1-4_0350 | Putative protein of unknown function                                                                                                                          | 0.698862 | 2.99E-09 | up |
| PAS_chr1-4_0352 | 60S ribosomal protein L18                                                                                                                                     | 1.00642  | 9.49E-30 | up |
| PAS_chr1-4_0353 | 40S ribosomal protein S19                                                                                                                                     | 1.210182 | 4.56E-43 | up |
| PAS_chr1-4_0369 | Hypothetical protein                                                                                                                                          | 0.986551 | 0.003581 | up |
| PAS_chr1-4_0370 | hypothetical protein                                                                                                                                          | 0.626954 | 1.64E-08 | up |
| PAS_chr1-4_0371 | Hypothetical protein                                                                                                                                          | 1.030226 | 9.05E-27 | up |
| PAS_chr1-4_0374 | Subunit of an adoMet-dependent tRNA methyltransferase (MTase) complex (Trm11p-Trm112p)                                                                        | 1.079046 | 0.000495 | up |
| PAS_chr1-4_0394 | Ammonium permease involved in regulation of pseudohyphal growth                                                                                               | 1.260032 | 1.07E-31 | up |
| PAS_chr1-4_0419 | Component of the mitotic exit network                                                                                                                         | 0.598661 | 4.83E-11 | up |
| PAS_chr1-4_0421 | Homocitrate synthase isozyme, catalyzes the                                                                                                                   | 0.919227 | 7.49E-24 | up |

|                 |                                                                                                    |          |          |    |
|-----------------|----------------------------------------------------------------------------------------------------|----------|----------|----|
|                 | condensation of acetyl-CoA and alpha-ketoglutarate                                                 |          |          |    |
| PAS_chr1-4_0422 | 40S ribosomal protein S9                                                                           | 1.348526 | 9.15E-41 | up |
| PAS_chr1-4_0426 | Endo-beta-1,3-glucanase, major protein of the cell wall, involved in cell wall maintenance         | 1.099303 | 1.20E-34 | up |
| PAS_chr1-4_0429 | Isopentenyl diphosphate:dimethylallyl diphosphate isomerase (IPP isomerase)                        | 0.629771 | 5.39E-08 | up |
| PAS_chr1-4_0445 | Delta subunit of the central stalk of mitochondrial F1F0 ATP synthase                              | 1.204213 | 3.42E-32 | up |
| PAS_chr1-4_0471 | 40S ribosomal protein S0                                                                           | 1.014367 | 1.04E-33 | up |
| PAS_chr1-4_0481 | Hypothetical protein                                                                               | 0.6607   | 7.13E-06 | up |
| PAS_chr1-4_0487 | Putative protein of unknown function                                                               | 0.708566 | 1.63E-17 | up |
| PAS_chr1-4_0489 | Cystathionine gamma-lyase                                                                          | 0.794734 | 9.52E-19 | up |
| PAS_chr1-4_0490 | 60S acidic ribosomal protein P2                                                                    | 0.992411 | 3.69E-25 | up |
| PAS_chr1-4_0510 | CFEM protein                                                                                       | 0.620759 | 6.15E-15 | up |
| PAS_chr1-4_0518 | Hypothetical protein                                                                               | 0.688543 | 2.89E-08 | up |
| PAS_chr1-4_0531 | Hypothetical protein                                                                               | 1.279607 | 1.26E-28 | up |
| PAS_chr1-4_0537 | Protein of unknown function, similar to Listeria monocytogenes major sigma factor                  | 1.003178 | 1.50E-28 | up |
| PAS_chr1-4_0540 | Hypothetical protein                                                                               | 0.726498 | 0.007869 | up |
| PAS_chr1-4_0547 | peroxiredoxin                                                                                      | 0.824597 | 2.68E-22 | up |
| PAS_chr1-4_0548 | Vacuolar proteinase B (yscB), a serine protease of the subtilisin family                           | 0.970816 | 1.00E-23 | up |
| PAS_chr1-4_0552 | Ammonium permease                                                                                  | 0.716364 | 3.55E-13 | up |
| PAS_chr1-4_0553 | hypothetical protein                                                                               | 0.843769 | 1.58E-07 | up |
| PAS_chr1-4_0557 | mitochondrial 54S ribosomal protein YmL47                                                          | 0.623873 | 1.02E-09 | up |
| PAS_chr1-4_0569 | Primary component of eisosomes                                                                     | 0.939944 | 5.67E-32 | up |
| PAS_chr1-4_0576 | Hypothetical protein                                                                               | 0.806466 | 5.72E-14 | up |
| PAS_chr1-4_0577 | Mitochondrial inner membrane insertase                                                             | 0.95996  | 1.99E-19 | up |
| PAS_chr1-4_0582 | Hypothetical protein                                                                               | 0.801275 | 4.64E-06 | up |
| PAS_chr1-4_0584 | Lectin-like protein with similarity to Flo1p, thought to be expressed and involved in flocculation | 1.330701 | 1.45E-57 | up |
| PAS_chr1-4_0586 | Hypothetical protein                                                                               | 0.761944 | 8.58E-29 | up |
| PAS_chr1-4_0587 | Hypothetical protein                                                                               | 0.864883 | 7.05E-17 | up |
| PAS_chr1-4_0588 | Hypothetical protein                                                                               | 1.021931 | 1.32E-32 | up |
| PAS_chr1-4_0589 | 40S ribosomal protein S2                                                                           | 1.246937 | 7.25E-49 | up |
| PAS_chr1-4_0593 | E1 beta subunit of the pyruvate dehydrogenase (PDH) complex                                        | 1.221457 | 4.68E-33 | up |
| PAS_chr1-4_0602 | N(6)-adenine-specific DNA methyltransferase                                                        | 1.052688 | 1.61E-18 | up |
| PAS_chr1-4_0604 | C-3 sterol dehydrogenase                                                                           | 1.288868 | 2.37E-38 | up |
| PAS_chr1-4_0611 | Vacuolar aminopeptidase Y, processed to mature form by Prb1p                                       | 1.049777 | 1.17E-34 | up |
| PAS_chr1-4_0612 | Hypothetical protein                                                                               | 1.105411 | 9.91E-30 | up |
| PAS_chr1-4_0615 | mitochondrial phosphate carrier protein                                                            | 1.202654 | 1.67E-44 | up |
| PAS_chr1-4_0617 | Phosphatidylinositol (PI) phosphatase                                                              | 0.688969 | 2.97E-14 | up |
| PAS_chr1-4_0629 | Subunit of the Ssh1 translocon complex                                                             | 1.041198 | 3.05E-23 | up |
| PAS_chr1-4_0669 | hypothetical protein                                                                               | 0.725946 | 2.81E-05 | up |
| PAS_chr1-4_0672 | hypothetical protein                                                                               | 0.986176 | 1.61E-06 | up |
| PAS_chr1-4_0676 | hypothetical protein                                                                               | 1.313537 | 4.70E-19 | up |
| PAS_chr1-4_0677 | hypothetical protein                                                                               | 0.726256 | 1.57E-07 | up |
| PAS_chr1-4_0685 | Dolichyl-diphosphooligosaccharide--protein glycosyltransferase subunit STT3                        | 0.841677 | 1.40E-17 | up |
| PAS_chr1-4_0686 | Small nuclear ribonucleoprotein-associated protein                                                 | 0.862555 | 5.16E-06 | up |
| PAS_chr1-4_0690 | hypothetical protein                                                                               | 0.698631 | 1.57E-05 | up |
| PAS_chr1-4_0703 | hypothetical protein                                                                               | 1.056813 | 6.44E-30 | up |
| PAS_chr2-1_0021 | Hypothetical protein                                                                               | 1.07149  | 6.80E-28 | up |
| PAS_chr2-1_0022 | 60S ribosomal protein L7                                                                           | 0.680059 | 3.31E-16 | up |

|                 |                                                                                                       |          |          |    |
|-----------------|-------------------------------------------------------------------------------------------------------|----------|----------|----|
| PAS_chr2-1_0032 | Putative protein of unknown function with similarity to glutamine amidotransferase proteins           | 0.601403 | 4.53E-07 | up |
| PAS_chr2-1_0037 | Nitrilase, member of the nitrilase branch of the nitrilase superfamily                                | 0.90322  | 1.50E-14 | up |
| PAS_chr2-1_0055 | Plasma membrane transporter for both urea and polyamines, expression is highly sensitive to nitrogen  | 0.827653 | 7.41E-15 | up |
| PAS_chr2-1_0072 | Delta(9) fatty acid desaturase                                                                        | 0.845317 | 4.99E-29 | up |
| PAS_chr2-1_0086 | 60S ribosomal protein L24                                                                             | 0.675782 | 9.84E-20 | up |
| PAS_chr2-1_0087 | 60S ribosomal protein L30                                                                             | 1.01438  | 9.36E-27 | up |
| PAS_chr2-1_0088 | Hypothetical protein                                                                                  | 0.792586 | 2.56E-17 | up |
| PAS_chr2-1_0092 | Pho85 cyclin of the Pcl1,2-like subfamily, involved in entry into the mitotic cell cycle and regulat  | 1.318779 | 1.68E-06 | up |
| PAS_chr2-1_0105 | Shuttling pre-60S factor                                                                              | 0.696182 | 5.40E-11 | up |
| PAS_chr2-1_0111 | Mitochondrial adenylate kinase, catalyzes the reversible synthesis of GTP and AMP from GDP and ADP    | 0.608993 | 6.97E-13 | up |
| PAS_chr2-1_0112 | Small rho-like GTPase, essential for establishment and maintenance of cell polarity                   | 0.853574 | 1.49E-22 | up |
| PAS_chr2-1_0117 | GTPase activating protein (GAP) for Rho1p, involved in signaling to the actin cytoskeleton, null mut  | 0.64547  | 1.90E-09 | up |
| PAS_chr2-1_0120 | Subunit of mitochondrial NAD(+)-dependent isocitrate dehydrogenase, which catalyzes the oxidation of  | 0.840664 | 3.40E-22 | up |
| PAS_chr2-1_0142 | Subunit (17 kDa) of TFIIID and SAGA complexes, involved in RNA polymerase II transcription initiation | 0.824532 | 1.10E-15 | up |
| PAS_chr2-1_0143 | Conserved protein of the mitochondrial matrix, performs a scaffolding function during assembly of ir  | 0.906086 | 5.94E-22 | up |
| PAS_chr2-1_0167 | Putative metalloprotease, similar to O-sialoglycoprotein metalloproteinase from P. haemolytica        | 0.711938 | 1.34E-08 | up |
| PAS_chr2-1_0183 | Acyl-protein thioesterase responsible for depalmitoylation of Gpa1p                                   | 0.647586 | 8.83E-11 | up |
| PAS_chr2-1_0191 | 3-hydroxy-3-methylglutaryl-CoA (HMG-CoA) synthase, catalyzes the formation of HMG-CoA from acetyl-Co  | 0.622884 | 6.43E-13 | up |
| PAS_chr2-1_0197 | D-Arabinono-1,4-lactone oxidase, catalyzes the final step in biosynthesis of D-erythroascorbic acid   | 0.629359 | 6.99E-11 | up |
| PAS_chr2-1_0198 | Fe(II)-dependent sulfonate/alpha-ketoglutarate dioxygenase, involved in sulfonate catabolism for use  | 1.096746 | 4.36E-19 | up |
| PAS_chr2-1_0212 | Protein O-mannosyltransferase, transfers mannose residues from dolichyl phosphate-D-mannose to prote  | 0.633852 | 2.24E-12 | up |
| PAS_chr2-1_0218 | Hypothetical protein                                                                                  | 0.822813 | 2.48E-24 | up |
| PAS_chr2-1_0233 | Cytoplasmic RNA-binding protein, contains an RNA recognition motif (RRM)                              | 1.091501 | 4.12E-16 | up |
| PAS_chr2-1_0235 | Na+/Pi cotransporter, active in early growth phase                                                    | 1.153777 | 1.02E-26 | up |
| PAS_chr2-1_0238 | Mitochondrial malate dehydrogenase, catalyzes interconversion of malate and oxaloacetate              | 0.802303 | 3.71E-25 | up |
| PAS_chr2-1_0253 | Hypothetical protein                                                                                  | 0.821071 | 7.19E-25 | up |
| PAS_chr2-1_0256 | Protein O-mannosyltransferase, transfers mannose residues from dolichyl phosphate-D-mannose to prote  | 0.680932 | 6.75E-14 | up |
| PAS_chr2-1_0257 | Nucleoside transporter with broad nucleoside selectivity                                              | 0.920522 | 9.87E-17 | up |
| PAS_chr2-1_0270 | Plasma membrane protein with roles in the uptake of protoporphyrin IX and the efflux of heme          | 0.861018 | 8.75E-06 | up |
| PAS_chr2-1_0272 | Hypothetical protein                                                                                  | 0.666323 | 9.91E-09 | up |
| PAS_chr2-1_0273 | Protein involved in bud-site selection                                                                | 0.91474  | 2.73E-17 | up |
| PAS_chr2-1_0279 | Triacylglycerol lipase of the lipid particle, responsible for all the TAG lipase activity of the lip  | 0.671058 | 2.74E-13 | up |
| PAS_chr2-1_0293 | Hypothetical protein                                                                                  | 0.774788 | 1.06E-15 | up |
| PAS_chr2-1_0309 | Protein with similarity to mammalian monocarboxylate permeases                                        | 0.621909 | 8.51E-11 | up |
| PAS_chr2-1_0313 | Bifunctional enzyme with alcohol dehydrogenase and glutathione-dependent formaldehyde dehydrogenase   | 0.883244 | 9.14E-31 | up |
| PAS_chr2-1_0314 | Protein that binds tRNA and methionyl- and glutamyl-tRNA synthetases (Mes1p and Gus1p)                | 0.746363 | 1.65E-15 | up |
| PAS_chr2-1_0333 | Zeta-crystallin homolog, found in the cytoplasm and nucleus                                           | 1.09607  | 8.64E-30 | up |
| PAS_chr2-1_0337 | Hypothetical protein                                                                                  | 0.848219 | 0.002951 | up |
| PAS_chr2-1_0341 | Hypothetical protein                                                                                  | 0.728962 | 2.75E-15 | up |
| PAS_chr2-1_0350 | Protein that forms a complex with Spt5p and mediates both activation and inhibition of transcription  | 0.911415 | 9.39E-11 | up |
| PAS_chr2-1_0351 | High affinity methionine permease                                                                     | 1.342169 | 1.90E-39 | up |

|                 |                                                                                                      |          |          |    |
|-----------------|------------------------------------------------------------------------------------------------------|----------|----------|----|
| PAS_chr2-1_0358 | Cystathionine beta-lyase, converts cystathionine into homocysteine                                   | 0.720586 | 3.03E-16 | up |
| PAS_chr2-1_0362 | 40S ribosomal protein S26                                                                            | 1.053235 | 6.80E-24 | up |
| PAS_chr2-1_0363 | Subunit VIa of cytochrome c oxidase, which is the terminal member of the mitochondrial inner membran | 0.842405 | 1.61E-24 | up |
| PAS_chr2-1_0365 | Putative protein of unknown function                                                                 | 1.09476  | 1.53E-31 | up |
| PAS_chr2-1_0376 | Putative GTPase, member of the Obg family                                                            | 1.192726 | 2.60E-42 | up |
| PAS_chr2-1_0383 | L-homoserine-O-acetyltransferase, catalyzes the conversion of homoserine to O-acetyl homoserine      | 0.618935 | 5.48E-11 | up |
| PAS_chr2-1_0415 | Alpha-isopropylmalate synthase (2-isopropylmalate synthase)                                          | 0.621278 | 1.21E-17 | up |
| PAS_chr2-1_0428 | One of two nearly identical (see HTB1) histone H2B subtypes                                          | 0.946519 | 7.15E-22 | up |
| PAS_chr2-1_0437 | Glyceraldehyde-3-phosphate dehydrogenase, isozyme 3, involved in glycolysis and gluconeogenesis      | 1.016714 | 9.70E-38 | up |
| PAS_chr2-1_0449 | GTP binding protein (mammalian Ranp homolog)                                                         | 0.802649 | 3.86E-22 | up |
| PAS_chr2-1_0450 | Component of the U1 snRNP complex required for pre-mRNA splicing                                     | 0.808233 | 7.81E-15 | up |
| PAS_chr2-1_0451 | Hypothetical protein                                                                                 | 1.498919 | 6.26E-29 | up |
| PAS_chr2-1_0472 | Mitochondrial alcohol dehydrogenase isozyme III                                                      | 1.48904  | 2.16E-54 | up |
| PAS_chr2-1_0474 | Hypothetical protein                                                                                 | 0.648968 | 4.71E-05 | up |
| PAS_chr2-1_0481 | 40S ribosomal protein S14                                                                            | 1.450698 | 3.85E-51 | up |
| PAS_chr2-1_0482 | 40S ribosomal protein S22                                                                            | 0.761867 | 1.89E-21 | up |
| PAS_chr2-1_0502 | Thiol-specific peroxiredoxin, reduces hydroperoxides to protect against oxidative damage             | 1.215982 | 6.53E-36 | up |
| PAS_chr2-1_0504 | Peroxisomal membrane protein                                                                         | 0.75754  | 7.32E-23 | up |
| PAS_chr2-1_0505 | Subunit of the GINS complex (Sld5p, Psf1p, Psf2p, Psf3p)                                             | 0.722682 | 2.33E-13 | up |
| PAS_chr2-1_0522 | Protein that associates with ribosomes                                                               | 1.343337 | 4.43E-49 | up |
| PAS_chr2-1_0526 | Putative protein of unknown function                                                                 | 0.794736 | 7.07E-14 | up |
| PAS_chr2-1_0536 | Hypothetical protein                                                                                 | 1.194894 | 1.10E-32 | up |
| PAS_chr2-1_0538 | Membrane protein that interacts with Yip1p to mediate membrane traffic                               | 0.725957 | 2.46E-18 | up |
| PAS_chr2-1_0539 | Hypothetical protein                                                                                 | 1.185769 | 2.89E-45 | up |
| PAS_chr2-1_0542 | Putative benzil reductase                                                                            | 1.042484 | 1.21E-33 | up |
| PAS_chr2-1_0553 | Deoxyhypusine hydroxylase, a HEAT-repeat containing metalloenzyme that catalyses hypusine formation  | 1.032113 | 6.52E-21 | up |
| PAS_chr2-1_0555 | Subunit of the cytosolic chaperonin Cct ring complex, related to Tcp1p                               | 0.636402 | 7.02E-14 | up |
| PAS_chr2-1_0578 | Hypothetical protein                                                                                 | 0.720057 | 1.94E-09 | up |
| PAS_chr2-1_0593 | Dihydroorotase, catalyzes the third enzymatic step in the de novo biosynthesis of pyrimidines        | 1.022646 | 2.79E-16 | up |
| PAS_chr2-1_0621 | mitochondrial 54S ribosomal protein YmL27                                                            | 0.695848 | 1.24E-06 | up |
| PAS_chr2-1_0633 | Integral membrane component of endoplasmic reticulum-derived COPII-coated vesicles                   | 0.587337 | 1.24E-08 | up |
| PAS_chr2-1_0634 | 40S ribosomal protein S27                                                                            | 0.657475 | 3.18E-11 | up |
| PAS_chr2-1_0637 | Bifunctional chorismate synthase and flavin reductase                                                | 0.712385 | 7.12E-16 | up |
| PAS_chr2-1_0648 | Protein component of the H/ACA snoRNP pseudouridylase complex                                        | 0.829407 | 3.64E-19 | up |
| PAS_chr2-1_0657 | 3-phosphoglycerate dehydrogenase, catalyzes the first step in serine and glycine biosynthesis        | 0.70152  | 2.87E-13 | up |
| PAS_chr2-1_0658 | 60S ribosomal protein L15                                                                            | 0.893397 | 7.45E-21 | up |
| PAS_chr2-1_0676 | Hypothetical protein                                                                                 | 0.704112 | 1.97E-07 | up |
| PAS_chr2-1_0679 | Tryptophan synthase involved in tryptophan biosynthesis                                              | 0.662168 | 1.38E-13 | up |
| PAS_chr2-1_0687 | Vacuolar ATPase V0 domain subunit c', involved in proton transport activity                          | 0.620239 | 2.33E-10 | up |
| PAS_chr2-1_0692 | Protein with a role in UDP-galactose transport to the Golgi lumen                                    | 0.658642 | 0.000282 | up |
| PAS_chr2-1_0719 | Putative transporter, member of the SLC10 carrier family                                             | 0.716265 | 8.18E-16 | up |
| PAS_chr2-1_0728 | 60S ribosomal protein L28                                                                            | 1.061395 | 3.68E-35 | up |
| PAS_chr2-1_0731 | Protein that binds tRNA and methionyl- and glutamyl-tRNA synthetases (Mes1p and Gus1p)               | 0.807816 | 7.06E-20 | up |
| PAS_chr2-1_0758 | Calmodulin                                                                                           | 0.671265 | 9.24E-16 | up |

|                 |                                                                                                      |          |          |    |
|-----------------|------------------------------------------------------------------------------------------------------|----------|----------|----|
| PAS_chr2-1_0806 | hypothetical protein                                                                                 | 0.770887 | 6.30E-14 | up |
| PAS_chr2-1_0812 | hypothetical protein                                                                                 | 1.336759 | 2.34E-39 | up |
| PAS_chr2-1_0815 | hypothetical protein                                                                                 | 0.832042 | 1.43E-19 | up |
| PAS_chr2-1_0853 | hypothetical protein                                                                                 | 1.263009 | 5.35E-43 | up |
| PAS_chr2-1_0858 | hypothetical protein                                                                                 | 0.900119 | 1.45E-12 | up |
| PAS_chr2-1_0860 | hypothetical protein                                                                                 | 0.592121 | 0.000701 | up |
| PAS_chr2-1_0864 | hypothetical protein                                                                                 | 1.216584 | 3.96E-29 | up |
| PAS_chr2-1_0867 | hypothetical protein                                                                                 | 0.721357 | 6.66E-16 | up |
| PAS_chr2-1_0876 | hypothetical protein                                                                                 | 1.199042 | 1.34E-38 | up |
| PAS_chr2-1_0877 | hypothetical protein                                                                                 | 0.79158  | 2.54E-09 | up |
| PAS_chr2-1_0887 | hypothetical protein                                                                                 | 0.595743 | 1.83E-14 | up |
| PAS_chr2-2_0019 | Peroxisomal 2,4-dienoyl-CoA reductase, auxiliary enzyme of fatty acid beta-oxidation                 | 0.796436 | 4.14E-19 | up |
| PAS_chr2-2_0034 | Alkaline phosphatase specific for p-nitrophenyl phosphate                                            | 1.223096 | 1.24E-40 | up |
| PAS_chr2-2_0042 | Specificity factor required for Rsp5p-dependent ubiquitination                                       | 0.690733 | 3.38E-07 | up |
| PAS_chr2-2_0053 | Phosphomannomutase, involved in synthesis of GDP-mannose and dolichol-phosphate-mannose              | 0.686553 | 2.44E-20 | up |
| PAS_chr2-2_0054 | 60S ribosomal protein L10                                                                            | 1.225521 | 1.89E-41 | up |
| PAS_chr2-2_0058 | Eukaryotic initiation factor (eIF) 2A                                                                | 0.836025 | 2.15E-14 | up |
| PAS_chr2-2_0059 | Nucleoside diphosphate kinase                                                                        | 1.23065  | 3.49E-50 | up |
| PAS_chr2-2_0062 | Putative protein of unknown function                                                                 | 0.920119 | 4.93E-25 | up |
| PAS_chr2-2_0063 | NADPH-dependent 1-acyl dihydroxyacetone phosphate reductase                                          | 0.758292 | 3.06E-19 | up |
| PAS_chr2-2_0064 | Protein of the SUN family (Sim1p, Uth1p, Nca3p, Sun4p) that may participate in DNA replication       | 0.928215 | 3.28E-23 | up |
| PAS_chr2-2_0084 | Repressible alkaline phosphatase, a glycoprotein localized to the vacuole                            | 0.646329 | 9.57E-13 | up |
| PAS_chr2-2_0087 | ADP-ribosylation factor, GTPase of the Ras superfamily                                               | 0.734212 | 6.05E-21 | up |
| PAS_chr2-2_0093 | Putative protein of unknown function                                                                 | 0.662959 | 2.01E-12 | up |
| PAS_chr2-2_0102 | Essential constituent of the mitochondrial inner membrane presequence translocase                    | 0.839809 | 1.28E-11 | up |
| PAS_chr2-2_0109 | 60S ribosomal protein L17                                                                            | 1.479479 | 1.06E-48 | up |
| PAS_chr2-2_0111 | NAD-dependent glycerol-3-phosphate dehydrogenase, key enzyme of glycerol synthesis                   | 0.711548 | 1.35E-17 | up |
| PAS_chr2-2_0113 | Inositol 1-phosphate synthase                                                                        | 0.82252  | 0.028708 | up |
| PAS_chr2-2_0115 | Boron efflux transporter of the plasma membrane                                                      | 0.695423 | 3.65E-10 | up |
| PAS_chr2-2_0131 | Catalase A, breaks down hydrogen peroxide in the peroxisomal matrix formed by acyl-CoA oxidase (Pox1 | 0.757797 | 6.78E-22 | up |
| PAS_chr2-2_0133 | Hypothetical protein                                                                                 | 0.606415 | 4.66E-05 | up |
| PAS_chr2-2_0145 | Isozyme of methylenetetrahydrofolate reductase                                                       | 0.594166 | 1.86E-10 | up |
| PAS_chr2-2_0147 | Hypothetical protein                                                                                 | 0.605392 | 4.12E-13 | up |
| PAS_chr2-2_0148 | Cell wall protein that contains a putative GPI-attachment site                                       | 1.398167 | 1.21E-43 | up |
| PAS_chr2-2_0156 | Hypothetical protein                                                                                 | 0.587983 | 1.71E-07 | up |
| PAS_chr2-2_0160 | Vacuolar amino acid transporter, exports aspartate and glutamate from the vacuole                    | 0.757593 | 1.01E-14 | up |
| PAS_chr2-2_0161 | Putative protein of unknown function                                                                 | 0.967533 | 2.02E-14 | up |
| PAS_chr2-2_0165 | Beta subunit of the F1 sector of mitochondrial F1F0 ATP synthase                                     | 1.375356 | 2.74E-45 | up |
| PAS_chr2-2_0168 | Homo-isocitrate dehydrogenase, an NAD-linked mitochondrial enzyme                                    | 0.906166 | 3.20E-23 | up |
| PAS_chr2-2_0180 | One of 10 subunits of the transport protein particle (TRAPP) complex of the cis-Golgi                | 0.997646 | 5.58E-20 | up |
| PAS_chr2-2_0198 | Hypothetical protein                                                                                 | 0.825656 | 1.29E-19 | up |
| PAS_chr2-2_0206 | Hypothetical protein                                                                                 | 0.594586 | 6.27E-13 | up |
| PAS_chr2-2_0214 | Protein of unknown function involved in rRNA and ribosome biosynthesis                               | 0.640799 | 3.20E-09 | up |
| PAS_chr2-2_0229 | 60S ribosomal protein L6                                                                             | 0.790501 | 2.55E-21 | up |
| PAS_chr2-2_0236 | Hypothetical protein                                                                                 | 0.797623 | 1.77E-24 | up |
| PAS_chr2-2_0238 | Threonyl-tRNA synthetase, essential cytoplasmic                                                      | 0.636694 | 8.44E-10 | up |



|                 |                                                                                                     |          |          |    |
|-----------------|-----------------------------------------------------------------------------------------------------|----------|----------|----|
|                 | protein                                                                                             |          |          |    |
| PAS_chr2-2_0256 | Hypothetical protein                                                                                | 0.591955 | 7.58E-14 | up |
| PAS_chr2-2_0257 | 40S ribosomal protein S20                                                                           | 1.179945 | 2.37E-38 | up |
| PAS_chr2-2_0258 | Hypothetical protein                                                                                | 0.859118 | 3.19E-19 | up |
| PAS_chr2-2_0265 | Hypothetical protein                                                                                | 0.605288 | 5.86E-08 | up |
| PAS_chr2-2_0266 | Subunit VIII of cytochrome c oxidase                                                                | 0.872052 | 5.16E-14 | up |
| PAS_chr2-2_0268 | Hypothetical protein                                                                                | 0.620535 | 0.000269 | up |
| PAS_chr2-2_0271 | GPI-anchored cell wall protein of unknown function                                                  | 0.774901 | 2.12E-21 | up |
| PAS_chr2-2_0276 | Plasma membrane sulfite pump involved in sulfite metabolism                                         | 0.763551 | 2.68E-19 | up |
| PAS_chr2-2_0277 | Protein of unknown function, localized to the mitochondrial outer membrane                          | 0.70689  | 1.34E-08 | up |
| PAS_chr2-2_0278 | Protein with an apparent role in acetylation of N-terminal methionine residues                      | 0.627291 | 9.08E-11 | up |
| PAS_chr2-2_0280 | Mitochondrial glycosylase/lyase                                                                     | 0.617057 | 5.06E-10 | up |
| PAS_chr2-2_0291 | Essential protein of the mitochondrial intermembrane space, forms a complex with Tim9p              | 0.892086 | 1.92E-16 | up |
| PAS_chr2-2_0293 | Cytochrome c heme lyase (holocytochrome c synthase), attaches heme to apo-cytochrome c              | 0.880144 | 1.68E-26 | up |
| PAS_chr2-2_0294 | E1 alpha subunit of the pyruvate dehydrogenase (PDH) complex                                        | 0.970961 | 1.19E-30 | up |
| PAS_chr2-2_0298 | Cyclin-dependent protein kinase regulatory subunit and adaptor                                      | 0.735226 | 1.11E-07 | up |
| PAS_chr2-2_0300 | Hypothetical protein                                                                                | 0.648363 | 3.08E-10 | up |
| PAS_chr2-2_0301 | Protein with seven cysteine-rich CCHC zinc-finger motifs, similar to human CNBP                     | 0.992702 | 2.37E-28 | up |
| PAS_chr2-2_0303 | Putative flavin-dependent monooxygenase, involved in ubiquinone (Coenzyme Q) biosynthesis           | 0.846978 | 4.04E-24 | up |
| PAS_chr2-2_0326 | 40S ribosomal protein S25                                                                           | 0.944334 | 1.19E-26 | up |
| PAS_chr2-2_0329 | Adenylosuccinate lyase, catalyzes two steps in the 'de novo' purine nucleotide biosynthetic pathway | 0.683582 | 1.11E-19 | up |
| PAS_chr2-2_0330 | Phosphatidylinositol:ceramide phosphoinositol transferase (IPC synthase)                            | 0.841319 | 7.46E-14 | up |
| PAS_chr2-2_0331 | Hypothetical protein                                                                                | 0.669982 | 2.84E-08 | up |
| PAS_chr2-2_0334 | Protein with similarity to mammalian electron transfer flavoprotein complex subunit ETF-alpha       | 0.959394 | 1.02E-25 | up |
| PAS_chr2-2_0337 | Transaldolase, enzyme in the non-oxidative pentose phosphate pathway                                | 0.628315 | 1.10E-14 | up |
| PAS_chr2-2_0338 | Transaldolase, enzyme in the non-oxidative pentose phosphate pathway                                | 0.748745 | 2.76E-17 | up |
| PAS_chr2-2_0355 | Mitochondrial inner membrane carnitine transporter                                                  | 0.721926 | 9.60E-12 | up |
| PAS_chr2-2_0391 | Ammonium permease                                                                                   | 1.200828 | 1.49E-39 | up |
| PAS_chr2-2_0392 | Mitochondrial porin (voltage-dependent anion channel), outer membrane protein                       | 0.93167  | 1.98E-29 | up |
| PAS_chr2-2_0394 | Hypothetical protein                                                                                | 0.618219 | 5.93E-15 | up |
| PAS_chr2-2_0402 | Subunit of the cytosolic chaperonin Cct ring complex, related to Tcp1p                              | 0.823896 | 4.45E-20 | up |
| PAS_chr2-2_0406 | Hypothetical protein                                                                                | 1.459812 | 9.82E-32 | up |
| PAS_chr2-2_0430 | Subunit 2 of the ubiquinol cytochrome-c reductase complex                                           | 0.859446 | 1.33E-22 | up |
| PAS_chr2-2_0460 | hypothetical protein                                                                                | 0.935514 | 1.25E-17 | up |
| PAS_chr2-2_0462 | hypothetical protein                                                                                | 0.842356 | 9.90E-22 | up |
| PAS_chr2-2_0463 | hypothetical protein                                                                                | 1.252464 | 1.08E-27 | up |
| PAS_chr2-2_0482 | hypothetical protein                                                                                | 0.913843 | 0.002622 | up |
| PAS_chr2-2_0483 | hypothetical protein                                                                                | 0.624043 | 0.030333 | up |
| PAS_chr2-2_0485 | hypothetical protein                                                                                | 0.87677  | 5.17E-18 | up |
| PAS_chr2-2_0488 | hypothetical protein                                                                                | 0.897418 | 5.39E-19 | up |
| PAS_chr2-2_0489 | hypothetical protein                                                                                | 0.893015 | 1.98E-29 | up |
| PAS_chr3_0006   | NADPH-dependent medium chain alcohol dehydrogenase                                                  | 0.587603 | 8.41E-14 | up |
| PAS_chr3_0015   | Hypothetical protein                                                                                | 0.977252 | 4.46E-24 | up |
| PAS_chr3_0016   | Hypothetical protein                                                                                | 1.114461 | 3.44E-19 | up |
| PAS_chr3_0023   | Putative transporter, member of the sugar porter family                                             | 0.656843 | 1.22E-10 | up |

|               |                                                                                                                              |          |          |    |
|---------------|------------------------------------------------------------------------------------------------------------------------------|----------|----------|----|
| PAS_chr3_0025 | Hypothetical protein                                                                                                         | 0.971593 | 0.047031 | up |
| PAS_chr3_0030 | Hypothetical protein                                                                                                         | 0.812063 | 1.77E-21 | up |
| PAS_chr3_0036 | S-adenosylmethionine transporter of the mitochondrial inner membrane, member of the mitochondrial ca                         | 0.585814 | 0.003858 | up |
| PAS_chr3_0039 | Beta-isopropylmalate dehydrogenase (IMDH), catalyzes the third step in the leucine biosynthesis path                         | 0.981158 | 1.46E-24 | up |
| PAS_chr3_0040 | Mitochondrial inner membrane transporter, exports 2-oxoadipate and 2-oxoglutarate from the mitochond                         | 1.248574 | 6.55E-42 | up |
| PAS_chr3_0053 | C-4 methyl sterol oxidase, catalyzes the first of three steps required to remove two C-4 methyl grou                         | 0.912293 | 1.58E-23 | up |
| PAS_chr3_0059 | Subunit f of the F0 sector of mitochondrial F1F0 ATP synthase, which is a large, evolutionarily cons                         | 0.829748 | 2.14E-20 | up |
| PAS_chr3_0064 | Hypothetical protein                                                                                                         | 0.853744 | 0.013189 | up |
| PAS_chr3_0066 | Peptide methionine sulfoxide reductase, reverses the oxidation of methionine residues                                        | 0.646789 | 2.09E-15 | up |
| PAS_chr3_0076 | Protein of unknown function, has similarity to Pry1p and Pry3p and to the plant PR-1 class of pathog                         | 0.88296  | 1.91E-23 | up |
| PAS_chr3_0082 | Enolase I, a phosphopyruvate hydratase that catalyzes the conversion of 2-phosphoglycerate to phosph                         | 0.762712 | 6.24E-27 | up |
| PAS_chr3_0086 | Peroxisomal 2,4-dienoyl-CoA reductase, auxiliary enzyme of fatty acid beta-oxidation                                         | 0.643971 | 1.62E-14 | up |
| PAS_chr3_0091 | 60S ribosomal protein L19                                                                                                    | 0.634284 | 1.76E-15 | up |
| PAS_chr3_0099 | Mitochondrial NAD <sup>+</sup> transporter, involved in the transport of NAD <sup>+</sup> into the mitochondria (see also YE | 1.259747 | 1.12E-41 | up |
| PAS_chr3_0119 | Putative protein of unknown function                                                                                         | 1.01702  | 8.58E-20 | up |
| PAS_chr3_0123 | Mitochondrial protein required for assembly of ubiquinol cytochrome-c reductase complex (cytochrome                          | 1.021545 | 4.35E-10 | up |
| PAS_chr3_0125 | Putative protein of unknown function                                                                                         | 0.857435 | 8.09E-15 | up |
| PAS_chr3_0130 | Farnesyl cysteine-carboxyl methyltransferase, mediates the carboxyl methylation step during C-termin                         | 1.107316 | 5.84E-12 | up |
| PAS_chr3_0138 | Hypothetical protein                                                                                                         | 0.60062  | 4.44E-05 | up |
| PAS_chr3_0149 | Hypothetical protein                                                                                                         | 0.699814 | 2.94E-06 | up |
| PAS_chr3_0150 | GTP-binding protein of the rho subfamily of Ras-like proteins, involved in establishment of cell pol                         | 1.002055 | 2.11E-28 | up |
| PAS_chr3_0167 | 3,4-dihydroxy-2-butanone-4-phosphate synthase (DHBP synthase), required for riboflavin biosynthesis                          | 1.401968 | 7.04E-39 | up |
| PAS_chr3_0176 | Mitochondrial ornithine acetyltransferase                                                                                    | 0.876481 | 3.43E-20 | up |
| PAS_chr3_0177 | Mitochondrial inner membrane citrate transporter                                                                             | 0.69069  | 3.01E-14 | up |
| PAS_chr3_0187 | Putative protein of unknown function                                                                                         | 0.735644 | 1.23E-10 | up |
| PAS_chr3_0191 | Hypothetical protein                                                                                                         | 0.671778 | 4.62E-10 | up |
| PAS_chr3_0196 | Hypothetical protein                                                                                                         | 1.227204 | 0.005174 | up |
| PAS_chr3_0208 | Hypothetical protein                                                                                                         | 0.806097 | 1.55E-16 | up |
| PAS_chr3_0222 | 3-hydroxyacyl-CoA dehydratase                                                                                                | 0.820892 | 2.89E-18 | up |
| PAS_chr3_0227 | Primary component of eisosomes                                                                                               | 0.890026 | 2.32E-24 | up |
| PAS_chr3_0236 | Elongase                                                                                                                     | 1.095226 | 6.28E-29 | up |
| PAS_chr3_0238 | Subunit of the ARP2/3 complex                                                                                                | 1.214854 | 8.50E-35 | up |
| PAS_chr3_0255 | Mitochondrial GTP/GDP transporter                                                                                            | 0.587864 | 2.93E-09 | up |
| PAS_chr3_0257 | Adenylate kinase                                                                                                             | 1.128348 | 5.94E-30 | up |
| PAS_chr3_0258 | Hypothetical protein                                                                                                         | 0.605008 | 6.21E-09 | up |
| PAS_chr3_0277 | 6-phosphogluconate dehydrogenase (decarboxylating)                                                                           | 0.915623 | 4.85E-32 | up |
| PAS_chr3_0287 | Integral membrane protein localized to mitochondria (untagged protein) and eisosomes, immobile patch                         | 1.216663 | 3.16E-36 | up |
| PAS_chr3_0290 | Protein component of the small (40S) ribosomal subunit                                                                       | 0.60647  | 7.03E-15 | up |
| PAS_chr3_0299 | Aspartic protease, attached to the plasma membrane via a glycosylphosphatidylinositol (GPI) anchor                           | 0.752956 | 2.51E-12 | up |
| PAS_chr3_0332 | Hypothetical protein                                                                                                         | 0.702571 | 1.03E-12 | up |
| PAS_chr3_0335 | 60S ribosomal protein L43                                                                                                    | 0.821567 | 5.66E-30 | up |
| PAS_chr3_0341 | Hypothetical protein                                                                                                         | 0.697249 | 1.07E-08 | up |
| PAS_chr3_0349 | NADP(+)-dependent dehydrogenase                                                                                              | 0.815279 | 1.39E-17 | up |
| PAS_chr3_0356 | Hypothetical protein                                                                                                         | 1.262142 | 2.64E-29 | up |
| PAS_chr3_0384 | Hypothetical protein                                                                                                         | 0.94671  | 1.99E-12 | up |

|               |                                                                                                      |          |          |    |
|---------------|------------------------------------------------------------------------------------------------------|----------|----------|----|
| PAS_chr3_0388 | Methionine aminopeptidase                                                                            | 0.645561 | 7.99E-12 | up |
| PAS_chr3_0404 | Putative protein of unknown function                                                                 | 1.026468 | 3.08E-34 | up |
| PAS_chr3_0410 | L-ornithine transaminase (OTase)                                                                     | 0.850508 | 1.30E-23 | up |
| PAS_chr3_0422 | Hypothetical protein                                                                                 | 0.873494 | 1.82E-22 | up |
| PAS_chr3_0444 | Hypothetical protein                                                                                 | 1.001757 | 4.29E-29 | up |
| PAS_chr3_0451 | Mitochondrial outer membrane protein                                                                 | 0.918827 | 3.17E-16 | up |
| PAS_chr3_0458 | Essential component of the Arp2/3 complex                                                            | 0.602712 | 1.57E-12 | up |
| PAS_chr3_0460 | Subunit b of the stator stalk of mitochondrial F1F0 ATP synthase                                     | 0.707686 | 8.18E-18 | up |
| PAS_chr3_0482 | Putative alanine transaminase (glutamic pyruvic transaminase)                                        | 0.737493 | 1.57E-13 | up |
| PAS_chr3_0528 | Saccharopine dehydrogenase (NADP+, L-glutamate-forming)                                              | 0.852849 | 4.93E-23 | up |
| PAS_chr3_0547 | Endoplasmic reticulum membrane protein                                                               | 0.77151  | 8.42E-22 | up |
| PAS_chr3_0551 | Vacuolar membrane protein of unknown function                                                        | 0.642942 | 5.37E-08 | up |
| PAS_chr3_0558 | Putative protein of unknown function                                                                 | 0.590589 | 0.000163 | up |
| PAS_chr3_0562 | Mitochondrial translation elongation factor Tu                                                       | 1.20753  | 2.27E-36 | up |
| PAS_chr3_0566 | 3-phosphoserine aminotransferase                                                                     | 0.632289 | 5.49E-15 | up |
| PAS_chr3_0576 | Alpha subunit of the F1 sector of mitochondrial F1F0 ATP synthase                                    | 1.046204 | 2.37E-32 | up |
| PAS_chr3_0584 | Component of the TOM (translocase of outer membrane) complex                                         | 0.738648 | 2.26E-09 | up |
| PAS_chr3_0585 | Hypothetical protein                                                                                 | 1.135364 | 8.02E-36 | up |
| PAS_chr3_0590 | Homeodomain-containing transcriptional repressor of PTR2                                             | 0.676696 | 9.80E-08 | up |
| PAS_chr3_0591 | Cytosolic L-asparaginase                                                                             | 0.737054 | 6.67E-15 | up |
| PAS_chr3_0595 | Translation initiation factor eIF4A, identical to Tif1p                                              | 1.015357 | 8.62E-33 | up |
| PAS_chr3_0596 | 40S ribosomal protein S21                                                                            | 0.955465 | 1.80E-27 | up |
| PAS_chr3_0597 | Long-chain base-1-phosphate phosphatase with specificity for dihydrosphingosine-1-phosphate          | 1.16072  | 8.41E-24 | up |
| PAS_chr3_0598 | Non-essential small GTPase of the Rho/Rac subfamily of Ras-like proteins                             | 0.68693  | 1.21E-12 | up |
| PAS_chr3_0615 | Subunit Va of cytochrome c oxidase                                                                   | 0.854153 | 2.83E-23 | up |
| PAS_chr3_0620 | Alpha-1,6-mannosyltransferase involved in cell wall mannan biosynthesis                              | 0.966333 | 5.50E-15 | up |
| PAS_chr3_0623 | Ornithine carbamoyltransferase (carbamoylphosphate:L-ornithine carbamoyltransferase)                 | 0.844412 | 4.58E-18 | up |
| PAS_chr3_0627 | Protein that binds to cruciform DNA structures                                                       | 0.620185 | 4.52E-16 | up |
| PAS_chr3_0633 | Putative serine type carboxypeptidase with a role in phytochelatin synthesis                         | 0.752928 | 1.67E-19 | up |
| PAS_chr3_0634 | Tryptophan synthase involved in tryptophan biosynthesis                                              | 0.765965 | 1.35E-17 | up |
| PAS_chr3_0640 | Carboxypeptidase Y inhibitor, function requires acetylation by the NatB N-terminal acetyltransferase | 0.903912 | 3.21E-22 | up |
| PAS_chr3_0647 | Fumarase, converts fumaric acid to L-malic acid in the TCA cycle                                     | 0.912239 | 1.44E-22 | up |
| PAS_chr3_0648 | Thiazole synthase, catalyzes formation of the thiazole moiety of thiamin pyrophosphate               | 0.685749 | 1.50E-17 | up |
| PAS_chr3_0649 | Transporter of thiamine or related compound                                                          | 0.791224 | 1.78E-13 | up |
| PAS_chr3_0662 | Ferrioxamine B transporter                                                                           | 1.028    | 3.13E-29 | up |
| PAS_chr3_0675 | Asparagine synthetase, isozyme of Asn1p                                                              | 0.685838 | 2.23E-12 | up |
| PAS_chr3_0681 | RNA exonuclease, required for U4 snRNA maturation                                                    | 0.689442 | 6.66E-11 | up |
| PAS_chr3_0697 | Hypothetical protein                                                                                 | 1.419277 | 5.84E-38 | up |
| PAS_chr3_0709 | Ubiquitin-conjugating enzyme most similar in sequence to Xenopus ubiquitin-conjugating enzyme E2-C   | 0.870754 | 5.06E-14 | up |
| PAS_chr3_0714 | Putative divalent metal ion transporter involved in iron homeostasis                                 | 0.602352 | 8.05E-12 | up |
| PAS_chr3_0722 | ubiquitin-40S ribosomal protein S31 fusion protein                                                   | 0.90072  | 1.83E-29 | up |
| PAS_chr3_0731 | Cytoplasmic ATPase that is a ribosome-associated molecular chaperone                                 | 1.316478 | 1.28E-41 | up |
| PAS_chr3_0735 | Inositolphosphotransferase 1, involved in synthesis of mannose-(inositol-P)2-ceramide (M(IP)2C)      | 0.792795 | 3.95E-11 | up |
| PAS_chr3_0743 | Nit protein, one of two proteins in <i>S. cerevisiae</i> with similarity to the Nit domain           | 0.66426  | 1.87E-16 | up |

|               |                                                                                             |          |          |    |
|---------------|---------------------------------------------------------------------------------------------|----------|----------|----|
| PAS_chr3_0744 | Aldose reductase involved in methylglyoxal, d-xylose and arabinose metabolism               | 0.904051 | 1.89E-25 | up |
| PAS_chr3_0746 | Putative protein of unknown function                                                        | 0.983458 | 4.07E-13 | up |
| PAS_chr3_0762 | 40S ribosomal protein S5                                                                    | 1.14747  | 1.04E-37 | up |
| PAS_chr3_0763 | Spore-specific water channel that mediates the transport of water across cell membranes     | 1.322758 | 1.09E-39 | up |
| PAS_chr3_0771 | Hypothetical protein                                                                        | 0.587446 | 2.15E-09 | up |
| PAS_chr3_0777 | Putative protein of unknown function                                                        | 0.598358 | 9.82E-06 | up |
| PAS_chr3_0781 | Glycogen synthase, similar to Gsy1p                                                         | 0.587875 | 3.37E-14 | up |
| PAS_chr3_0795 | Protein involved in the organization of the actin cytoskeleton                              | 0.722415 | 2.43E-19 | up |
| PAS_chr3_0799 | Large subunit of carbamoyl phosphate synthetase                                             | 0.706808 | 8.61E-17 | up |
| PAS_chr3_0807 | Mitochondrial intermembrane space cysteine motif protein                                    | 0.600004 | 4.90E-16 | up |
| PAS_chr3_0808 | Hypothetical protein                                                                        | 0.861411 | 3.68E-23 | up |
| PAS_chr3_0809 | Hypothetical protein                                                                        | 1.061103 | 2.69E-25 | up |
| PAS_chr3_0819 | Subunit g of the mitochondrial F1F0 ATP synthase                                            | 0.828112 | 7.13E-17 | up |
| PAS_chr3_0826 | Tetrameric phosphoglycerate mutase                                                          | 1.221127 | 1.88E-52 | up |
| PAS_chr3_0829 | Hypothetical protein                                                                        | 0.656737 | 0.014476 | up |
| PAS_chr3_0831 | Alpha subunit of succinyl-CoA ligase                                                        | 0.931795 | 8.08E-31 | up |
| PAS_chr3_0832 | Transketolase, similar to Tkl2p                                                             | 1.120591 | 4.71E-36 | up |
| PAS_chr3_0834 | Transketolase, similar to Tkl2p                                                             | 0.918945 | 2.87E-28 | up |
| PAS_chr3_0839 | Gamma subunit of the translation initiation factor eIF2                                     | 0.762739 | 5.55E-22 | up |
| PAS_chr3_0842 | Multifunctional protein with both hydroxymethylpyrimidine kinase and thiaminase activities  | 0.746299 | 1.79E-10 | up |
| PAS_chr3_0843 | Bifunctional enzyme                                                                         | 1.393798 | 2.28E-31 | up |
| PAS_chr3_0867 | Non-essential intracellular esterase that can function as an S-formylglutathione hydrolase  | 1.148165 | 3.59E-40 | up |
| PAS_chr3_0868 | Fructose-1,6-bisphosphatase, key regulatory enzyme in the gluconeogenesis pathway           | 1.055181 | 3.77E-42 | up |
| PAS_chr3_0870 | GDP-mannose pyrophosphorylase (mannose-1-phosphate guanylttransferase)                      | 0.834489 | 5.91E-21 | up |
| PAS_chr3_0875 | Protein localized to COPII-coated vesicles, forms a complex with Erv46p                     | 0.870593 | 1.75E-13 | up |
| PAS_chr3_0890 | S-adenosyl-L-homocysteine hydrolase                                                         | 0.792796 | 4.84E-22 | up |
| PAS_chr3_0899 | Homoserine kinase, conserved protein required for threonine biosynthesis                    | 1.014236 | 4.65E-40 | up |
| PAS_chr3_0906 | Mitochondrial peroxiredoxin (1-Cys Prx) with thioredoxin peroxidase activity                | 1.451619 | 8.57E-36 | up |
| PAS_chr3_0909 | Hypothetical protein                                                                        | 0.585894 | 0.035563 | up |
| PAS_chr3_0919 | Protein of unknown function                                                                 | 0.640831 | 6.71E-06 | up |
| PAS_chr3_0932 | NAD(+)-dependent formate dehydrogenase, may protect cells from exogenous formate            | 0.736431 | 2.17E-21 | up |
| PAS_chr3_0946 | mitochondrial 37S ribosomal protein RSM10                                                   | 0.785393 | 5.79E-14 | up |
| PAS_chr3_0951 | Triose phosphate isomerase, abundant glycolytic enzyme                                      | 0.77508  | 3.41E-25 | up |
| PAS_chr3_0952 | Hypothetical protein                                                                        | 0.817287 | 6.83E-11 | up |
| PAS_chr3_0954 | Uroporphyrinogen decarboxylase                                                              | 0.852973 | 3.18E-19 | up |
| PAS_chr3_0960 | Glycoprotein involved in cell wall beta-glucan assembly                                     | 0.878616 | 1.40E-16 | up |
| PAS_chr3_0968 | Transcription factor involved in cell-type-specific transcription and pheromone response    | 0.923194 | 4.79E-28 | up |
| PAS_chr3_0970 | Hypothetical protein                                                                        | 0.793652 | 1.08E-09 | up |
| PAS_chr3_0971 | Divalent metal ion transporter with a broad specificity for di-valent and tri-valent metals | 0.916501 | 6.19E-28 | up |
| PAS_chr3_0972 | Cytoplasmic mRNA cap binding protein                                                        | 0.758762 | 1.59E-23 | up |
| PAS_chr3_0973 | Hypothetical protein                                                                        | 0.590681 | 3.33E-12 | up |
| PAS_chr3_0982 | Ferric reductase and cupric reductase                                                       | 0.84521  | 1.01E-18 | up |
| PAS_chr3_0985 | Putative protein of unknown function with similarity to acyl-carrier-protein reductases     | 0.887297 | 4.99E-15 | up |
| PAS_chr3_0997 | Cytochrome c1, component of the mitochondrial respiratory chain                             | 0.924828 | 3.63E-28 | up |
| PAS_chr3_0999 | Glucosyl transferase, involved in N-linked                                                  | 1.189757 | 1.73E-28 | up |

|               |                                                                                                    |          |          |    |
|---------------|----------------------------------------------------------------------------------------------------|----------|----------|----|
|               | glycosylation                                                                                      |          |          |    |
| PAS_chr3_1004 | Hypothetical protein                                                                               | 1.031233 | 1.74E-09 | up |
| PAS_chr3_1015 | Protein required for growth of cells lacking the mitochondrial genome                              | 1.316731 | 1.68E-31 | up |
| PAS_chr3_1028 | S-(hydroxymethyl)glutathione dehydrogenase                                                         | 0.838501 | 3.18E-27 | up |
| PAS_chr3_1037 | Lumazine synthase (6,7-dimethyl-8-ribityllumazine synthase, also known as DMRL synthase)           | 0.602926 | 1.49E-12 | up |
| PAS_chr3_1040 | Proteolipid subunit of the vacuolar H(+)-ATPase V0 sector                                          | 0.847267 | 2.82E-25 | up |
| PAS_chr3_1041 | small nucleolar ribonucleoprotein SNU13                                                            | 0.612935 | 0.000184 | up |
| PAS_chr3_1048 | Translation initiation factor eIF-5A, promotes formation of the first peptide bond                 | 0.878547 | 1.80E-30 | up |
| PAS_chr3_1057 | 60S ribosomal protein L32                                                                          | 0.733086 | 2.80E-23 | up |
| PAS_chr3_1058 | Putative integral membrane protein                                                                 | 1.120289 | 1.58E-25 | up |
| PAS_chr3_1071 | Translation elongation factor EF-1 gamma                                                           | 0.810834 | 3.20E-26 | up |
| PAS_chr3_1087 | Vacuolar aspartyl protease (proteinase A)                                                          | 0.68714  | 1.22E-16 | up |
| PAS_chr3_1089 | Sporulation specific protein that localizes to the spore wall                                      | 0.954068 | 5.48E-22 | up |
| PAS_chr3_1099 | Glycerol proton symporter of the plasma membrane, subject to glucose-induced inactivation          | 1.016657 | 2.25E-25 | up |
| PAS_chr3_1108 | Plasma membrane protein involved in zinc metabolism and osmotin-induced apoptosis                  | 0.597203 | 1.73E-07 | up |
| PAS_chr3_1138 | Adenine phosphoribosyltransferase, catalyzes the formation of AMP                                  | 1.053621 | 9.26E-28 | up |
| PAS_chr3_1169 | hypothetical protein                                                                               | 1.175288 | 4.35E-37 | up |
| PAS_chr3_1199 | hypothetical protein                                                                               | 0.720437 | 4.01E-19 | up |
| PAS_chr3_1200 | 40S ribosomal protein S12                                                                          | 1.055874 | 7.91E-34 | up |
| PAS_chr3_1215 | hypothetical protein                                                                               | 1.184714 | 5.59E-23 | up |
| PAS_chr3_1245 | hypothetical protein                                                                               | 0.666505 | 7.59E-11 | up |
| PAS_chr3_1256 | hypothetical protein                                                                               | 1.007166 | 7.13E-17 | up |
| PAS_chr4_0026 | hypothetical protein                                                                               | 0.633705 | 6.28E-12 | up |
| PAS_chr4_0038 | Translational elongation factor 3, stimulates the binding of aminoacyl-tRNA (AA-tRNA) to ribosomes | 0.830142 | 4.66E-18 | up |
| PAS_chr4_0040 | Protein of unknown function                                                                        | 0.662942 | 1.36E-16 | up |
| PAS_chr4_0041 | 60S ribosomal protein L22                                                                          | 1.165788 | 1.47E-31 | up |
| PAS_chr4_0043 | Mitochondrial aldehyde dehydrogenase                                                               | 1.560649 | 5.35E-40 | up |
| PAS_chr4_0046 | Mitochondrial outer membrane and cell wall localized SUN family member                             | 1.196077 | 8.08E-35 | up |
| PAS_chr4_0052 | Hypothetical protein                                                                               | 0.883417 | 2.82E-22 | up |
| PAS_chr4_0065 | Protein involved in synthesis of the thiamine precursor hydroxymethylpyrimidine (HMP)              | 0.675766 | 0.000803 | up |
| PAS_chr4_0075 | Hypothetical protein                                                                               | 0.931877 | 1.96E-14 | up |
| PAS_chr4_0102 | elongation factor 1 gamma domain-containing protein                                                | 1.189995 | 9.69E-36 | up |
| PAS_chr4_0104 | Zinc-finger protein of unknown function                                                            | 0.91239  | 0.000525 | up |
| PAS_chr4_0107 | 60S ribosomal protein L2                                                                           | 1.095787 | 6.35E-33 | up |
| PAS_chr4_0111 | Low affinity methionine permease, similar to Mup1p                                                 | 0.587521 | 6.71E-05 | up |
| PAS_chr4_0112 | Threonine aldolase                                                                                 | 0.615323 | 3.99E-16 | up |
| PAS_chr4_0116 | Protein involved in N-glycosylation                                                                | 1.19967  | 1.93E-18 | up |
| PAS_chr4_0120 | Hypothetical protein                                                                               | 0.883568 | 2.81E-24 | up |
| PAS_chr4_0123 | Receptor for alpha-factor pheromone                                                                | 0.933331 | 1.97E-10 | up |
| PAS_chr4_0131 | 60S ribosomal protein L6                                                                           | 1.317552 | 5.89E-44 | up |
| PAS_chr4_0138 | Small subunit of carbamoyl phosphate synthetase                                                    | 0.753645 | 5.99E-20 | up |
| PAS_chr4_0139 | 60S ribosomal protein L3                                                                           | 1.402596 | 1.74E-43 | up |
| PAS_chr4_0140 | ATP-dependent DEAD (Asp-Glu-Ala-Asp)-box RNA helicase                                              | 0.674604 | 3.03E-16 | up |
| PAS_chr4_0157 | Histone variant H2AZ, exchanged for histone H2A in nucleosomes by the SWR1 complex                 | 0.875132 | 2.01E-28 | up |
| PAS_chr4_0158 | Tetradecameric mitochondrial chaperonin                                                            | 0.640314 | 2.49E-17 | up |
| PAS_chr4_0181 | High-affinity copper transporter of the plasma membrane                                            | 0.6441   | 1.23E-10 | up |

|               |                                                                                                        |          |          |    |
|---------------|--------------------------------------------------------------------------------------------------------|----------|----------|----|
| PAS_chr4_0198 | C-8 sterol isomerase                                                                                   | 0.64971  | 1.24E-09 | up |
| PAS_chr4_0201 | Essential ATP-dependent RNA helicase of the DEAD-box protein family                                    | 0.601628 | 1.07E-11 | up |
| PAS_chr4_0210 | ADP/ATP carrier protein                                                                                | 1.212531 | 2.05E-42 | up |
| PAS_chr4_0211 | 40S ribosomal protein S7                                                                               | 0.619272 | 2.71E-18 | up |
| PAS_chr4_0212 | Ribose-5-phosphate ketol-isomerase                                                                     | 0.721057 | 1.19E-20 | up |
| PAS_chr4_0218 | Mitochondrial type 2C protein phosphatase involved in regulation of pyruvate dehydrogenase activity    | 0.833772 | 5.46E-25 | up |
| PAS_chr4_0222 | Non-essential small GTPase of the Rho/Rac subfamily of Ras-like proteins                               | 0.814195 | 2.50E-08 | up |
| PAS_chr4_0224 | Evolutionarily conserved subunit of the CCR4-NOT complex involved in controlling mRNA initiation       | 0.993661 | 8.33E-18 | up |
| PAS_chr4_0246 | 40S ribosomal protein S4                                                                               | 1.106652 | 1.89E-41 | up |
| PAS_chr4_0264 | Dolichyl pyrophosphate (Dol-P-P) phosphatase with a lumenally oriented active site in the ER           | 0.653219 | 6.71E-09 | up |
| PAS_chr4_0280 | Putative methylthio-ribulose-1-phosphate dehydratase                                                   | 0.834888 | 3.76E-17 | up |
| PAS_chr4_0283 | Hypothetical protein                                                                                   | 0.604866 | 3.60E-14 | up |
| PAS_chr4_0284 | Cytoplasmic thioredoxin isoenzyme of the thioredoxin system                                            | 0.696457 | 8.60E-14 | up |
| PAS_chr4_0285 | Phosphoserine phosphatase of the phosphoglycerate pathway, involved in serine and glycine biosynthesis | 0.869857 | 3.11E-25 | up |
| PAS_chr4_0289 | Hypothetical protein                                                                                   | 0.8548   | 4.21E-07 | up |
| PAS_chr4_0290 | Vacuolar transporter chaperon (VTC) involved in distributing V-ATPase and other membrane proteins      | 0.691741 | 9.12E-07 | up |
| PAS_chr4_0292 | 40S ribosomal protein S24                                                                              | 0.899591 | 1.13E-30 | up |
| PAS_chr4_0305 | O-glycosylated protein required for cell wall stability                                                | 0.825371 | 3.67E-16 | up |
| PAS_chr4_0312 | tRNA 2'-phosphotransferase                                                                             | 0.605775 | 1.88E-07 | up |
| PAS_chr4_0330 | Methionine and cysteine synthase (O-acetyl homoserine-O-acetyl serine sulfhydrylase)                   | 1.376788 | 3.16E-50 | up |
| PAS_chr4_0336 | Putative dihydrokaempferol 4-reductase                                                                 | 0.75693  | 3.12E-15 | up |
| PAS_chr4_0341 | Hypothetical protein                                                                                   | 0.652946 | 2.41E-11 | up |
| PAS_chr4_0359 | Hypothetical protein                                                                                   | 1.219824 | 2.31E-24 | up |
| PAS_chr4_0360 | Hypothetical protein                                                                                   | 1.199198 | 2.34E-29 | up |
| PAS_chr4_0368 | Microsomal beta-keto-reductase                                                                         | 0.928498 | 1.77E-19 | up |
| PAS_chr4_0369 | Subunit alpha of assimilatory sulfite reductase                                                        | 0.950834 | 2.17E-21 | up |
| PAS_chr4_0370 | Protein that associates with the INO80 chromatin remodeling complex under low-salt conditions          | 0.687334 | 1.09E-08 | up |
| PAS_chr4_0371 | Hypothetical protein                                                                                   | 0.732927 | 0.001278 | up |
| PAS_chr4_0372 | Putative protein of unknown function                                                                   | 0.646229 | 3.68E-12 | up |
| PAS_chr4_0384 | Hypothetical protein                                                                                   | 0.720609 | 2.39E-16 | up |
| PAS_chr4_0391 | Component of the TOM (translocase of outer membrane) complex                                           | 0.958385 | 1.93E-21 | up |
| PAS_chr4_0397 | Protein of unknown function                                                                            | 0.791621 | 2.75E-05 | up |
| PAS_chr4_0398 | Delta 1-pyrroline-5-carboxylate reductase, catalyzes the last step in proline biosynthesis             | 1.091528 | 4.93E-23 | up |
| PAS_chr4_0412 | 60S acidic ribosomal protein P1                                                                        | 1.46186  | 4.66E-49 | up |
| PAS_chr4_0413 | 60S ribosomal protein L13                                                                              | 1.20846  | 2.78E-41 | up |
| PAS_chr4_0414 | 40S ribosomal protein S16                                                                              | 0.754823 | 5.32E-24 | up |
| PAS_chr4_0416 | Alanine:glyoxylate aminotransferase (AGT), catalyzes the synthesis of glycine from glyoxylate          | 1.108035 | 4.85E-32 | up |
| PAS_chr4_0418 | Delta-aminolevulinate dehydratase, a homo-octameric enzyme                                             | 0.930272 | 1.16E-22 | up |
| PAS_chr4_0427 | Evolutionarily conserved protein with similarity to Orm2p                                              | 0.803861 | 7.99E-17 | up |
| PAS_chr4_0456 | 40S ribosomal protein S13                                                                              | 0.931513 | 4.52E-30 | up |
| PAS_chr4_0496 | Peroxisomal ubiquitin conjugating enzyme                                                               | 0.586612 | 1.29E-12 | up |
| PAS_chr4_0504 | Protein of unknown function                                                                            | 1.051155 | 6.08E-29 | up |
| PAS_chr4_0514 | Purine-cytosine permease                                                                               | 1.245106 | 5.66E-30 | up |
| PAS_chr4_0524 | 40S ribosomal protein S1                                                                               | 1.378732 | 1.46E-41 | up |
| PAS_chr4_0529 | Hypothetical protein                                                                                   | 1.140967 | 2.92E-20 | up |
| PAS_chr4_0532 | Permease of basic amino acids in the vacuolar membrane                                                 | 0.615918 | 5.51E-10 | up |

|               |                                                                                                      |          |          |    |
|---------------|------------------------------------------------------------------------------------------------------|----------|----------|----|
| PAS_chr4_0551 | Protein of unknown function                                                                          | 1.028054 | 2.45E-22 | up |
| PAS_chr4_0552 | ATPase involved in protein folding and nuclear localization signal (NLS)-directed nuclear transport  | 0.654554 | 4.17E-18 | up |
| PAS_chr4_0554 | Hypothetical protein                                                                                 | 0.678246 | 0.000254 | up |
| PAS_chr4_0556 | Hypothetical protein                                                                                 | 0.619646 | 0.038167 | up |
| PAS_chr4_0561 | Mitochondrial intermembrane space protein, forms a complex with Tlm8p                                | 0.937794 | 1.51E-12 | up |
| PAS_chr4_0562 | Similar to globins and has a functional heme-binding domain                                          | 0.733033 | 1.25E-17 | up |
| PAS_chr4_0571 | Glycerol proton symporter of the plasma membrane, subject to glucose-induced inactivation            | 1.122012 | 1.68E-30 | up |
| PAS_chr4_0572 | Hypothetical protein                                                                                 | 0.669737 | 5.14E-16 | up |
| PAS_chr4_0578 | Carbonic anhydrase                                                                                   | 0.597933 | 9.25E-14 | up |
| PAS_chr4_0580 | Subunit of mitochondrial NAD(+)-dependent isocitrate dehydrogenase                                   | 0.654528 | 1.03E-18 | up |
| PAS_chr4_0584 | Aspartic protease, attached to the plasma membrane via a glycosylphosphatidylinositol (GPI) anchor   | 0.815905 | 4.22E-20 | up |
| PAS_chr4_0587 | Mitochondrial serine hydroxymethyltransferase                                                        | 0.804076 | 5.42E-19 | up |
| PAS_chr4_0588 | Hypothetical protein                                                                                 | 0.944311 | 2.84E-17 | up |
| PAS_chr4_0589 | Hypothetical protein                                                                                 | 0.899287 | 1.96E-19 | up |
| PAS_chr4_0592 | Mitochondrial iron transporter of the mitochondrial carrier family (MCF)                             | 0.894145 | 1.31E-17 | up |
| PAS_chr4_0593 | Glyoxylate reductase                                                                                 | 0.593233 | 1.60E-12 | up |
| PAS_chr4_0603 | Acidic protein of the mitochondrial matrix involved in oxidative phosphorylation                     | 0.983666 | 1.80E-30 | up |
| PAS_chr4_0604 | B-type cyclin involved in cell cycle progression                                                     | 0.781978 | 2.85E-15 | up |
| PAS_chr4_0613 | Adenylosuccinate synthase                                                                            | 1.142608 | 2.91E-46 | up |
| PAS_chr4_0624 | Non-essential protein of unknown function required for transcriptional induction                     | 0.856939 | 4.21E-24 | up |
| PAS_chr4_0630 | Hypothetical protein                                                                                 | 0.905792 | 2.20E-10 | up |
| PAS_chr4_0635 | Hypothetical protein                                                                                 | 0.660196 | 7.10E-10 | up |
| PAS_chr4_0643 | Hypothetical protein                                                                                 | 0.826424 | 6.00E-22 | up |
| PAS_chr4_0665 | Gamma-glutamyl phosphate reductase, catalyzes the second step in proline biosynthesis                | 0.713704 | 1.15E-17 | up |
| PAS_chr4_0668 | Beta 5 subunit of the 20S proteasome, responsible for the chymotryptic activity of the proteasome    | 0.69469  | 2.75E-15 | up |
| PAS_chr4_0672 | Hypothetical protein                                                                                 | 0.780112 | 9.57E-13 | up |
| PAS_chr4_0677 | Gamma-aminobutyrate (GABA) transaminase (4-aminobutyrate aminotransferase)                           | 0.923762 | 5.70E-16 | up |
| PAS_chr4_0682 | Protein kinase that stabilizes several plasma membrane amino acid transporters                       | 0.893978 | 6.69E-14 | up |
| PAS_chr4_0686 | Vacuolar carboxypeptidase yscS                                                                       | 1.196402 | 3.67E-34 | up |
| PAS_chr4_0688 | Mitochondrial succinate-fumarate transporter                                                         | 0.73873  | 1.28E-10 | up |
| PAS_chr4_0714 | Mitochondrial serine protease                                                                        | 0.7583   | 2.56E-13 | up |
| PAS_chr4_0726 | Putative protein of unknown function                                                                 | 0.681046 | 4.54E-16 | up |
| PAS_chr4_0733 | Flavoprotein subunit of succinate dehydrogenase (Sdh1p, Sdh2p, Sdh3p, Sdh4p)                         | 0.839747 | 8.57E-28 | up |
| PAS_chr4_0737 | Mitochondrial NADH-cytochrome b5 reductase, involved in ergosterol biosynthesis                      | 1.002624 | 3.46E-27 | up |
| PAS_chr4_0743 | Hypothetical protein                                                                                 | 0.947687 | 3.44E-19 | up |
| PAS_chr4_0749 | Golgi membrane protein involved in manganese homeostasis                                             | 0.813355 | 1.34E-06 | up |
| PAS_chr4_0758 | Integral membrane protein localized to late Golgi vesicles along with the v-SNARE Tlg2p              | 1.048335 | 1.76E-23 | up |
| PAS_chr4_0780 | Enoyl reductase that catalyzes the last step in each cycle of very long chain fatty acid elongation  | 0.646462 | 2.19E-10 | up |
| PAS_chr4_0785 | Glutamine synthetase (GS), synthesizes glutamine from glutamate and ammonia                          | 1.194292 | 5.90E-45 | up |
| PAS_chr4_0786 | Cytosolic superoxide dismutase                                                                       | 0.876015 | 1.44E-30 | up |
| PAS_chr4_0795 | Homoaconitase, catalyzes the conversion of homocitrate to homoisocitrate, which is a step in the lys | 0.916855 | 1.94E-23 | up |
| PAS_chr4_0799 | mitochondrial 54S ribosomal protein YmL7/YmL5                                                        | 0.972767 | 1.71E-13 | up |
| PAS_chr4_0807 | Hypothetical protein                                                                                 | 0.616628 | 0.000357 | up |
| PAS_chr4_0811 | Vacuolar membrane protein of unknown function involved in vacuolar protein sorting                   | 0.672141 | 7.91E-12 | up |

|                 |                                                                                                     |          |          |      |
|-----------------|-----------------------------------------------------------------------------------------------------|----------|----------|------|
| PAS_chr4_0813   | mitochondrial 37S ribosomal protein YmS18                                                           | 0.984019 | 6.57E-21 | up   |
| PAS_chr4_0815   | Mitochondrial malate dehydrogenase, catalyzes interconversion of malate and oxaloacetate            | 1.013822 | 7.81E-32 | up   |
| PAS_chr4_0821   | Alcohol oxidase                                                                                     | 1.186096 | 7.24E-35 | up   |
| PAS_chr4_0823   | Polyamine oxidase, converts spermine to spermidine                                                  | 0.911377 | 1.23E-23 | up   |
| PAS_chr4_0834   | Hypothetical protein                                                                                | 0.703372 | 5.98E-06 | up   |
| PAS_chr4_0847   | Self-glucosylating initiator of glycogen synthesis, also glucosylates n-dodecyl-beta-D-maltoside    | 0.814468 | 5.38E-21 | up   |
| PAS_chr4_0850   | Hypothetical protein                                                                                | 0.804559 | 4.68E-18 | up   |
| PAS_chr4_0851   | Hypothetical protein                                                                                | 0.816665 | 7.12E-16 | up   |
| PAS_chr4_0866   | Mitochondrial membrane localized inositol phosphosphingolipid phospholipase C                       | 0.600439 | 3.28E-09 | up   |
| PAS_chr4_0877   | Mitochondrial dicarboxylate carrier, integral membrane protein                                      | 0.939385 | 6.92E-22 | up   |
| PAS_chr4_0884   | hypothetical protein                                                                                | 0.858931 | 2.99E-12 | up   |
| PAS_chr4_0895   | 54S ribosomal protein L35, mitochondrial                                                            | 0.710167 | 1.95E-14 | up   |
| PAS_chr4_0911   | hypothetical protein                                                                                | 0.762581 | 8.45E-10 | up   |
| PAS_chr4_0914   | hypothetical protein                                                                                | 0.755847 | 6.83E-11 | up   |
| PAS_chr4_0915   | hypothetical protein                                                                                | 1.311754 | 3.77E-17 | up   |
| PAS_chr4_0924   | hypothetical protein                                                                                | 0.675843 | 0.005973 | up   |
| PAS_chr4_0925   | hypothetical protein                                                                                | 0.949742 | 2.04E-06 | up   |
| PAS_chr4_0926   | hypothetical protein                                                                                | 0.70649  | 1.28E-13 | up   |
| PAS_chr4_0938   | hypothetical protein                                                                                | 0.655012 | 4.24E-08 | up   |
| PAS_chr4_0940   | hypothetical protein                                                                                | 0.61939  | 3.30E-13 | up   |
| PAS_chr4_0947   | hypothetical protein                                                                                | 1.267107 | 2.54E-37 | up   |
| PAS_chr4_0948   | hypothetical protein                                                                                | 1.008165 | 2.11E-24 | up   |
| PAS_chr4_0949   | hypothetical protein                                                                                | 0.729193 | 0.000369 | up   |
| PAS_chr4_0972   | hypothetical protein                                                                                | 1.055343 | 2.91E-22 | up   |
| PAS_chr4_0974   | hypothetical protein                                                                                | 1.259507 | 3.06E-40 | up   |
| PAS_chr4_0978   | hypothetical protein                                                                                | 0.901122 | 2.08E-21 | up   |
| PAS_chr4_0981   | hypothetical protein                                                                                | 0.864567 | 4.41E-17 | up   |
| PAS_chr4_0982   | 60S acidic ribosomal protein P1                                                                     | 0.89199  | 4.77E-25 | up   |
| PAS_chr4_0988   | hypothetical protein                                                                                | 0.827637 | 1.03E-14 | up   |
| PAS_chr4_0991   | hypothetical protein                                                                                | 0.749494 | 2.90E-09 | up   |
| PAS_FragB_0027  | AP-3 complex subunit delta                                                                          | -0.60202 | 9.84E-09 | down |
| PAS_FragB_0028  | Hypothetical protein                                                                                | -0.74244 | 5.45E-07 | down |
| PAS_FragB_0037  | 54S ribosomal protein L24, mitochondrial                                                            | -0.76624 | 1.58E-08 | down |
| PAS_FragB_0044  | Transcriptional coactivator HFI1/ADA1                                                               | -0.86247 | 9.32E-11 | down |
| PAS_FragB_0072  | hypothetical protein                                                                                | -0.69502 | 2.55E-05 | down |
| PAS_FragD_0015  | Mitochondrial RNA polymerase specificity factor                                                     | -0.58565 | 4.72E-06 | down |
| PAS_c121_0019   | Hypothetical protein                                                                                | -0.59586 | 0.009671 | down |
| PAS_c131_0006   | Hypothetical protein                                                                                | -0.9348  | 8.61E-17 | down |
| PAS_chr1-1_0005 | Inositol hexakisphosphate and inositol heptakisphosphate kinase                                     | -0.65694 | 1.20E-08 | down |
| PAS_chr1-1_0012 | TFIID subunit (19 kDa), involved in RNA polymerase II transcription initiation                      | -0.70057 | 1.79E-05 | down |
| PAS_chr1-1_0014 | Lsm (Like Sm) protein                                                                               | -0.78565 | 0.016685 | down |
| PAS_chr1-1_0015 | Putative endoribonuclease                                                                           | -0.82702 | 1.20E-06 | down |
| PAS_chr1-1_0018 | Subunit of the heterodimeric FACT complex (Spt16p-Pob3p)                                            | -0.86959 | 3.60E-16 | down |
| PAS_chr1-1_0020 | Actin-like protein                                                                                  | -0.61584 | 0.020447 | down |
| PAS_chr1-1_0031 | Cytoplasmic pre-60S factor                                                                          | -0.86204 | 1.41E-12 | down |
| PAS_chr1-1_0034 | vacuolar sorting protein                                                                            | -0.67776 | 0.0003   | down |
| PAS_chr1-1_0043 | Hypothetical protein                                                                                | -1.07575 | 4.25E-20 | down |
| PAS_chr1-1_0055 | Protein that interacts with Cdc48p and Npl4p, involved in recognition of polyubiquitinated proteins | -1.01075 | 8.89E-12 | down |



|                 |                                                                                                      |          |          |      |
|-----------------|------------------------------------------------------------------------------------------------------|----------|----------|------|
| PAS_chr1-1_0057 | Putative protein serine/threonine kinase expressed at the end of meiosis                             | -0.73896 | 0.015512 | down |
| PAS_chr1-1_0067 | Essential N-acetylglucosamine-phosphate mutase                                                       | -0.69761 | 7.55E-10 | down |
| PAS_chr1-1_0079 | Non-ATPase regulatory subunit of the 26S proteasome                                                  | -0.98583 | 7.26E-31 | down |
| PAS_chr1-1_0083 | Kinesin-related motor protein involved in mitotic spindle positioning                                | -0.99742 | 7.48E-06 | down |
| PAS_chr1-1_0088 | Essential protein that binds ribosomal protein L11                                                   | -0.87982 | 8.10E-06 | down |
| PAS_chr1-1_0108 | Hypothetical protein                                                                                 | -0.74821 | 1.63E-06 | down |
| PAS_chr1-1_0151 | Protein that relieves transcriptional repression by binding to the Cyc8p-Tup1p corepressor           | -0.98899 | 3.29E-09 | down |
| PAS_chr1-1_0230 | tRNA methyltransferase, methylates the N-1 position of guanosine in tRNAs                            | -0.64909 | 0.000467 | down |
| PAS_chr1-1_0237 | Nucleotide exchange factor for the endoplasmic reticulum (ER) luminal Hsp70 chaperone Kar2p          | -0.60286 | 7.69E-06 | down |
| PAS_chr1-1_0238 | Protein whose overexpression affects chromosome stability, potential Cdc28p substrate                | -0.75119 | 1.94E-07 | down |
| PAS_chr1-1_0242 | DNA Topoisomerase III, conserved protein that functions in a complex with Sgs1p and Rmi1p            | -0.6094  | 0.018291 | down |
| PAS_chr1-1_0246 | Hypothetical protein                                                                                 | -0.93828 | 0.00075  | down |
| PAS_chr1-1_0250 | Essential component of the conserved oligomeric Golgi complex (Cog1p through Cog8p)                  | -0.66165 | 0.007385 | down |
| PAS_chr1-1_0251 | Hypothetical protein                                                                                 | -0.94171 | 0.002985 | down |
| PAS_chr1-1_0260 | Hypothetical protein                                                                                 | -0.8069  | 8.05E-07 | down |
| PAS_chr1-1_0288 | Subunit of the RNA polymerase II mediator complex                                                    | -0.60786 | 0.027485 | down |
| PAS_chr1-1_0291 | Protein required for ribosomal large subunit maturation, functionally redundant with Ssf1p           | -0.80622 | 0.000345 | down |
| PAS_chr1-1_0296 | Mitochondrial ribosomal protein of the small subunit                                                 | -0.65841 | 4.21E-05 | down |
| PAS_chr1-1_0297 | Mitochondrial protein kinase                                                                         | -0.84151 | 3.59E-08 | down |
| PAS_chr1-1_0326 | Hypothetical protein                                                                                 | -0.6156  | 1.47E-05 | down |
| PAS_chr1-1_0331 | 90S preribosome/SSU processome component KRR1                                                        | -0.69294 | 7.48E-06 | down |
| PAS_chr1-1_0332 | Pheromone-regulated multispinning membrane protein involved in membrane fusion during mating         | -1.10614 | 6.45E-09 | down |
| PAS_chr1-1_0367 | Protein that interacts with Cdc48p and Npl4p, involved in recognition of polyubiquitinated proteins  | -0.80649 | 8.21E-13 | down |
| PAS_chr1-1_0374 | Conserved NAD <sup>+</sup> dependent histone deacetylase of the Sirtuin family                       | -0.61358 | 3.58E-06 | down |
| PAS_chr1-1_0377 | RNA exonuclease                                                                                      | -0.62941 | 1.37E-06 | down |
| PAS_chr1-1_0381 | bZIP transcription factor (ATF/CREB1 homolog) that regulates the unfolded protein response           | -0.785   | 3.71E-13 | down |
| PAS_chr1-1_0393 | Chitin synthase I                                                                                    | -0.77365 | 3.66E-09 | down |
| PAS_chr1-1_0399 | Hypothetical protein                                                                                 | -0.82653 | 4.32E-14 | down |
| PAS_chr1-1_0404 | Putative integral membrane protein of unknown function                                               | -0.70049 | 4.47E-07 | down |
| PAS_chr1-1_0406 | Hypothetical protein                                                                                 | -0.84315 | 0.000115 | down |
| PAS_chr1-1_0407 | Putative protein of unknown function                                                                 | -0.6464  | 1.05E-07 | down |
| PAS_chr1-1_0427 | Putative protein of unknown function with some similarity to GPM1/YKL152C, a phosphoglycerate mutase | -0.79284 | 3.25E-07 | down |
| PAS_chr1-1_0444 | Cytoplasmic protein required for sporulation                                                         | -0.61163 | 0.010675 | down |
| PAS_chr1-1_0446 | Protein involved in an early, nucleolar step of 60S ribosomal subunit biogenesis                     | -0.60425 | 5.33E-05 | down |
| PAS_chr1-1_0450 | Subunit of a complex with Ctf8p and Ctf18p that shares some components with Replication Factor C     | -0.98807 | 1.17E-17 | down |
| PAS_chr1-1_0457 | Phosphatidylinositol-4-phosphate 5-kinase                                                            | -0.84921 | 1.01E-10 | down |
| PAS_chr1-1_0468 | hypothetical protein                                                                                 | -1.29821 | 1.90E-05 | down |
| PAS_chr1-1_0473 | hypothetical protein                                                                                 | -0.70583 | 4.75E-07 | down |
| PAS_chr1-1_0474 | hypothetical protein                                                                                 | -0.89352 | 1.49E-07 | down |
| PAS_chr1-1_0477 | hypothetical protein                                                                                 | -0.59928 | 0.059758 | down |
| PAS_chr1-1_0481 | hypothetical protein                                                                                 | -0.86362 | 1.90E-06 | down |
| PAS_chr1-1_0493 | hypothetical protein                                                                                 | -0.64636 | 0.000805 | down |
| PAS_chr1-3_0014 | Flavin-containing monooxygenase, localized to the cytoplasmic face of the ER membrane                | -0.75946 | 1.72E-08 | down |
| PAS_chr1-3_0020 | Hypothetical protein                                                                                 | -0.58768 | 2.73E-07 | down |
| PAS_chr1-3_0055 | Class II abasic (AP) endonuclease involved in repair of                                              | -0.89651 | 0.000651 | down |

|                 |                                                                                                      |          |          |      |
|-----------------|------------------------------------------------------------------------------------------------------|----------|----------|------|
|                 | DNA damage                                                                                           |          |          |      |
| PAS_chr1-3_0074 | Cytoplasmic ATP-dependent RNA helicase of the DEAD-box family                                        | -0.99301 | 1.75E-14 | down |
| PAS_chr1-3_0079 | Nuclear protein that inhibits replication of Brome mosaic virus in <i>S. cerevisiae</i>              | -0.69649 | 3.16E-08 | down |
| PAS_chr1-3_0080 | Hydrophilic protein that acts in conjunction with SNARE proteins                                     | -0.93784 | 5.63E-06 | down |
| PAS_chr1-3_0088 | Hypothetical protein                                                                                 | -0.85835 | 0.000207 | down |
| PAS_chr1-3_0093 | Protein with similarity to bovine phospholipase A1                                                   | -0.90197 | 5.50E-06 | down |
| PAS_chr1-3_0118 | Mitochondrial ribosomal protein of the large subunit                                                 | -1.0639  | 7.05E-14 | down |
| PAS_chr1-3_0130 | Pyrimidine nucleotidase                                                                              | -0.64756 | 5.07E-08 | down |
| PAS_chr1-3_0174 | One of several homologs of bacterial chaperone DnaJ, located in the ER lumen                         | -0.77772 | 5.85E-06 | down |
| PAS_chr1-3_0179 | Hypothetical protein                                                                                 | -0.71775 | 2.14E-07 | down |
| PAS_chr1-3_0182 | Essential splicing factor                                                                            | -0.75283 | 0.001452 | down |
| PAS_chr1-3_0184 | Protein involved in proteolytic activation of Rim101p in response to alkaline pH                     | -0.67452 | 1.72E-06 | down |
| PAS_chr1-3_0192 | Alpha subunit of both the farnesyltransferase and type I geranylgeranyltransferase                   | -0.77702 | 0.000313 | down |
| PAS_chr1-3_0195 | Essential, non-ATPase regulatory subunit of the 26S proteasome                                       | -1.07461 | 2.99E-35 | down |
| PAS_chr1-3_0204 | Putative protein of unknown function with strong similarity to alanyl-tRNA synthases from Eubacteria | -0.76402 | 1.85E-09 | down |
| PAS_chr1-3_0219 | Cis-golgi GTPase-activating protein (GAP)                                                            | -0.62391 | 0.005421 | down |
| PAS_chr1-3_0242 | Component of the evolutionarily conserved kinetochore-associated Ndc80 complex                       | -0.64635 | 0.033413 | down |
| PAS_chr1-3_0260 | Hypothetical protein                                                                                 | -0.81044 | 3.39E-07 | down |
| PAS_chr1-3_0269 | Proline oxidase, nuclear-encoded mitochondrial protein                                               | -0.74154 | 0.000535 | down |
| PAS_chr1-3_0272 | Putative ATP-dependent RNA helicase, nucleolar protein                                               | -0.65077 | 0.00011  | down |
| PAS_chr1-3_0278 | Hypothetical protein                                                                                 | -0.7605  | 0.004953 | down |
| PAS_chr1-3_0279 | Hypothetical protein                                                                                 | -1.28563 | 5.51E-09 | down |
| PAS_chr1-3_0288 | Hypothetical protein                                                                                 | -0.65485 | 0.040516 | down |
| PAS_chr1-3_0289 | Hypothetical protein                                                                                 | -0.71605 | 1.80E-08 | down |
| PAS_chr1-3_0291 | hypothetical protein                                                                                 | -0.98288 | 0.002612 | down |
| PAS_chr1-3_0298 | hypothetical protein                                                                                 | -0.69197 | 0.013939 | down |
| PAS_chr1-3_0311 | hypothetical protein                                                                                 | -1.03855 | 0.000359 | down |
| PAS_chr1-3_0312 | hypothetical protein                                                                                 | -0.61793 | 0.014199 | down |
| PAS_chr1-4_0010 | Beta-adaptin, large subunit of the clathrin-associated protein (AP-1) complex                        | -0.73278 | 8.05E-10 | down |
| PAS_chr1-4_0021 | CBK1 kinase activator protein MOB2                                                                   | -0.68623 | 0.000142 | down |
| PAS_chr1-4_0023 | One of four subunits of the endosomal sorting complex required for transport III (ESCRT-III)         | -0.75591 | 5.03E-10 | down |
| PAS_chr1-4_0024 | cis-Golgi t-SNARE syntaxin required for vesicular transport between the ER and the Golgi complex     | -0.63298 | 0.001278 | down |
| PAS_chr1-4_0029 | tRNA-specific 2-thiouridylase, responsible for 2-thiolation of the wobble base of mitochondrial tRNA | -0.6885  | 0.000538 | down |
| PAS_chr1-4_0037 | Alpha-1,2-mannosyltransferase                                                                        | -0.72078 | 6.74E-09 | down |
| PAS_chr1-4_0038 | Transcription elongation factor S-II                                                                 | -0.69424 | 0.000179 | down |
| PAS_chr1-4_0040 | High affinity iron permease involved in the transport of iron across the plasma membrane             | -0.92446 | 2.31E-17 | down |
| PAS_chr1-4_0052 | Protein of unknown function that may interact with ribosomes                                         | -0.58754 | 1.27E-05 | down |
| PAS_chr1-4_0062 | hypothetical protein                                                                                 | -0.85954 | 5.36E-15 | down |
| PAS_chr1-4_0068 | Putative protein of unknown function                                                                 | -0.71974 | 1.29E-06 | down |
| PAS_chr1-4_0072 | Co-chaperone that binds to Hsp82p and activates its ATPase activity                                  | -1.27503 | 1.59E-09 | down |
| PAS_chr1-4_0073 | Hypothetical protein                                                                                 | -0.69969 | 2.38E-08 | down |
| PAS_chr1-4_0090 | Polyamine transport protein specific for spermine                                                    | -0.91762 | 1.80E-14 | down |
| PAS_chr1-4_0094 | GTP binding protein                                                                                  | -0.66909 | 0.000148 | down |
| PAS_chr1-4_0106 | Arginine methyltransferase                                                                           | -0.73383 | 3.72E-06 | down |
| PAS_chr1-4_0109 | Protein involved in iron metabolism in mitochondria                                                  | -0.85009 | 1.11E-15 | down |
| PAS_chr1-4_0119 | Essential protein involved in the TOR signaling                                                      | -0.8184  | 3.58E-05 | down |

|                 | pathway                                                                                           |          |          |      |
|-----------------|---------------------------------------------------------------------------------------------------|----------|----------|------|
| PAS_chr1-4_0123 | Putative protein of unknown function                                                              | -0.82646 | 9.19E-13 | down |
| PAS_chr1-4_0130 | Heat shock protein Hsp90                                                                          | -1.16754 | 2.88E-28 | down |
| PAS_chr1-4_0134 | Core component of the signal recognition particle (SRP) ribonucleoprotein (RNP) complex           | -0.67182 | 4.35E-10 | down |
| PAS_chr1-4_0148 | Mitochondrial ribosomal protein of the large subunit                                              | -0.98802 | 1.25E-10 | down |
| PAS_chr1-4_0158 | Clathrin light chain                                                                              | -0.6184  | 9.38E-13 | down |
| PAS_chr1-4_0170 | Hypothetical protein                                                                              | -0.66702 | 0.001016 | down |
| PAS_chr1-4_0188 | Nitric oxide oxidoreductase, flavohemoglobin involved in nitric oxide detoxification              | -1.40695 | 1.55E-31 | down |
| PAS_chr1-4_0191 | ATP-dependent RNA helicase, component of the mitochondrial degradosome along with the RNase Dss1p | -0.77037 | 5.13E-05 | down |
| PAS_chr1-4_0196 | Phosphatidylinositol 3,5-bisphosphate-binding protein                                             | -0.59775 | 3.80E-05 | down |
| PAS_chr1-4_0198 | Pantothenate synthase, also known as pantoate-beta-alanine ligase                                 | -0.88786 | 4.98E-18 | down |
| PAS_chr1-4_0210 | Core component of the signal recognition particle (SRP) ribonucleoprotein (RNP) complex           | -0.70507 | 0.00035  | down |
| PAS_chr1-4_0224 | Hypothetical protein                                                                              | -0.83675 | 9.73E-08 | down |
| PAS_chr1-4_0227 | hypothetical protein                                                                              | -0.89864 | 1.21E-05 | down |
| PAS_chr1-4_0263 | Protein required for maturation of the 25S and 5.8S ribosomal RNAs                                | -0.84359 | 2.19E-11 | down |
| PAS_chr1-4_0318 | Transcription initiation factor TFIID subunit 3                                                   | -0.68179 | 0.02861  | down |
| PAS_chr1-4_0327 | Hypothetical protein                                                                              | -1.08247 | 0.006567 | down |
| PAS_chr1-4_0335 | Conserved nuclear RNA-binding protein                                                             | -1.14007 | 3.90E-19 | down |
| PAS_chr1-4_0342 | Essential protein with similarity to phosducins, which are G-protein regulators                   | -0.7264  | 2.76E-05 | down |
| PAS_chr1-4_0359 | RNA polymerase II subunit B12.6                                                                   | -1.51163 | 0.000442 | down |
| PAS_chr1-4_0361 | Hypothetical protein                                                                              | -0.59629 | 2.76E-09 | down |
| PAS_chr1-4_0367 | C-5 sterol desaturase, catalyzes the introduction of a C-5(6) double bond into episterol          | -1.04545 | 2.17E-21 | down |
| PAS_chr1-4_0385 | Ser/Thr protein kinase involved in salt tolerance                                                 | -0.72292 | 4.32E-06 | down |
| PAS_chr1-4_0403 | Essential evolutionarily-conserved nucleolar protein component of the box C/D snoRNP complexes    | -0.63534 | 9.10E-11 | down |
| PAS_chr1-4_0405 | Subunit of the heterohexameric Gim/prefoldin protein complex                                      | -0.64648 | 0.034345 | down |
| PAS_chr1-4_0409 | Putative positive regulator of mannosylphosphate transferase (Mnn6p)                              | -0.59896 | 0.000362 | down |
| PAS_chr1-4_0446 | Hypothetical protein                                                                              | -0.59628 | 6.77E-05 | down |
| PAS_chr1-4_0450 | N-succinyl-5-aminoimidazole-4-carboxamide ribotide (SAICAR) synthetase                            | -0.78036 | 4.64E-13 | down |
| PAS_chr1-4_0462 | Membrane glycoprotein v-SNARE                                                                     | -0.60655 | 0.000452 | down |
| PAS_chr1-4_0463 | Cytosolic seryl-tRNA synthetase, class II aminoacyl-tRNA synthetase                               | -0.59484 | 2.25E-12 | down |
| PAS_chr1-4_0492 | Transcriptional modulator                                                                         | -0.68726 | 1.71E-07 | down |
| PAS_chr1-4_0493 | Nucleolar protein, required for pre-25S rRNA processing                                           | -0.66692 | 0.002318 | down |
| PAS_chr1-4_0526 | Regulatory protein MIG1                                                                           | -0.60338 | 1.21E-06 | down |
| PAS_chr1-4_0529 | Subunit of the heterodimeric FACT complex (Spt16p-Pob3p)                                          | -0.79597 | 6.51E-19 | down |
| PAS_chr1-4_0539 | Essential nucleolar protein involved in pre-18S rRNA processing                                   | -0.665   | 0.000906 | down |
| PAS_chr1-4_0596 | Subunit of the RNA polymerase II-associated Paf1 complex                                          | -0.80951 | 5.60E-08 | down |
| PAS_chr1-4_0606 | Membrane-associated protein                                                                       | -0.68424 | 0.00439  | down |
| PAS_chr1-4_0614 | Core Sm protein Sm D3                                                                             | -0.6633  | 0.020484 | down |
| PAS_chr1-4_0633 | 5' to 3' exonuclease, 5' flap endonuclease                                                        | -0.94604 | 2.71E-10 | down |
| PAS_chr1-4_0635 | Hypothetical protein                                                                              | -0.6028  | 0.004825 | down |
| PAS_chr1-4_0639 | transcription factor                                                                              | -0.59459 | 2.21E-05 | down |
| PAS_chr1-4_0640 | U3 small nucleolar RNA-associated protein                                                         | -1.0078  | 6.62E-14 | down |
| PAS_chr1-4_0649 | Mitochondrial respiratory chain complexes assembly protein RCA1                                   | -0.81052 | 3.43E-13 | down |
| PAS_chr1-4_0650 | Chromatin structure-remodeling complex protein RSC7                                               | -0.63586 | 7.52E-07 | down |

|                 |                                                                                                      |          |          |      |
|-----------------|------------------------------------------------------------------------------------------------------|----------|----------|------|
| PAS_chr1-4_0653 | hypothetical protein                                                                                 | -0.963   | 1.85E-13 | down |
| PAS_chr1-4_0656 | hypothetical protein                                                                                 | -0.74992 | 1.27E-07 | down |
| PAS_chr1-4_0662 | hypothetical protein                                                                                 | -0.69157 | 0.000232 | down |
| PAS_chr1-4_0663 | hypothetical protein                                                                                 | -0.65639 | 1.87E-09 | down |
| PAS_chr1-4_0678 | hypothetical protein                                                                                 | -0.61143 | 0.075371 | down |
| PAS_chr1-4_0693 | hypothetical protein                                                                                 | -0.88937 | 2.86E-07 | down |
| PAS_chr2-1_0011 | ATPase of the ATP-binding cassette (ABC) family involved in 40S and 60S ribosome biogenesis, has sim | -0.87329 | 1.44E-07 | down |
| PAS_chr2-1_0027 | Putative protein of unknown function                                                                 | -0.88713 | 4.03E-07 | down |
| PAS_chr2-1_0036 | Hypothetical protein                                                                                 | -0.6296  | 0.001953 | down |
| PAS_chr2-1_0039 | Essential 121kDa subunit of the exocyst complex (Sec3p, Sec5p, Sec6p, Sec8p, Sec10p, Sec15p, Exo70p  | -0.68964 | 0.00021  | down |
| PAS_chr2-1_0040 | Protein with similarity to ATP-binding cassette (ABC) transporter family members                     | -0.74493 | 1.31E-07 | down |
| PAS_chr2-1_0042 | Hsp70 (Ssa1p) nucleotide exchange factor, cytosolic homolog of Sillp, which is the nucleotide exchan | -0.63755 | 1.22E-06 | down |
| PAS_chr2-1_0043 | Subunit of TFIIF complex, involved in transcription initiation, similar to 34 kDa subunit of human T | -0.65655 | 2.11E-08 | down |
| PAS_chr2-1_0056 | Palmitoyltransferase that acts on the SNAREs Snc1p, Syn8p, Tlg1p and likely on all SNAREs            | -0.64388 | 0.066635 | down |
| PAS_chr2-1_0061 | Checkpoint protein, involved in the activation of the DNA damage and meiotic pachytene checkpoints   | -0.7035  | 0.000908 | down |
| PAS_chr2-1_0062 | JmjC domain-containing histone demethylase which can specifically demethylate H3K36 tri- and dimethy | -0.65169 | 6.83E-05 | down |
| PAS_chr2-1_0067 | Pseudouridine synthase, catalyzes only the formation of pseudouridine-55 (Psi55), a highly conserved | -0.80719 | 0.006147 | down |
| PAS_chr2-1_0074 | GTPase-activating protein for Sec4p and several other Rab GTPases, regulates exocytosis via its acti | -1.03701 | 1.03E-12 | down |
| PAS_chr2-1_0081 | Hypothetical protein                                                                                 | -0.70616 | 0.000179 | down |
| PAS_chr2-1_0101 | Exopolyphosphatase, hydrolyzes inorganic polyphosphate (poly P) into Pi residues                     | -1.15324 | 1.12E-13 | down |
| PAS_chr2-1_0139 | Mitochondrial ribosomal protein of the small subunit                                                 | -0.61935 | 0.000166 | down |
| PAS_chr2-1_0153 | Protein that stimulates strand exchange by facilitating Rad51p binding to single-stranded DNA        | -1.01756 | 2.12E-22 | down |
| PAS_chr2-1_0185 | Protein subunit of mitochondrial RNase P, has roles in nuclear transcription, cytoplasmic and mitoch | -0.89225 | 5.79E-16 | down |
| PAS_chr2-1_0187 | Hypothetical protein                                                                                 | -0.83787 | 4.10E-07 | down |
| PAS_chr2-1_0200 | F-box receptor protein, subunit of the Skp1-Cdc53-F-box receptor (SCF) E3 ubiquitin ligase complex   | -0.9717  | 2.52E-10 | down |
| PAS_chr2-1_0206 | Subunit of COMPASS (Set1C), a complex which methylates histone H3 on lysine 4 and is required in tel | -1.01054 | 2.42E-09 | down |
| PAS_chr2-1_0207 | Mitochondrial GTPase related to dynamin, present in a complex containing Ugo1p and Fzo1p             | -0.87648 | 2.29E-16 | down |
| PAS_chr2-1_0232 | Cleavage and polyadenylation factor I (CF I) component involved in cleavage and polyadenylation of m | -0.60547 | 3.29E-05 | down |
| PAS_chr2-1_0244 | Mitochondrial translation initiation factor 2                                                        | -0.72572 | 0.041096 | down |
| PAS_chr2-1_0266 | Hypothetical protein                                                                                 | -0.97104 | 0.059705 | down |
| PAS_chr2-1_0274 | Protein involved in postreplication repair                                                           | -0.59127 | 0.008433 | down |
| PAS_chr2-1_0276 | Hypothetical protein                                                                                 | -0.74109 | 1.03E-07 | down |
| PAS_chr2-1_0277 | TFIIA large subunit                                                                                  | -0.88935 | 7.23E-10 | down |
| PAS_chr2-1_0278 | Hypothetical protein                                                                                 | -1.00996 | 1.56E-06 | down |
| PAS_chr2-1_0283 | Putative tRNA acetyltransferase                                                                      | -0.60257 | 0.004867 | down |
| PAS_chr2-1_0288 | Hypothetical protein                                                                                 | -0.64408 | 0.001454 | down |
| PAS_chr2-1_0324 | Oligomeric mitochondrial matrix chaperone                                                            | -0.83392 | 5.61E-17 | down |
| PAS_chr2-1_0339 | Putative protein of unknown function                                                                 | -0.74527 | 8.43E-15 | down |
| PAS_chr2-1_0340 | Hypothetical protein                                                                                 | -0.60464 | 0.022664 | down |
| PAS_chr2-1_0344 | Protein required for assembly of cytochrome c oxidase                                                | -0.91293 | 0.000342 | down |
| PAS_chr2-1_0347 | Protein kinase                                                                                       | -0.80747 | 3.11E-08 | down |
| PAS_chr2-1_0348 | Hypothetical protein                                                                                 | -0.65008 | 0.01637  | down |
| PAS_chr2-1_0353 | Hypothetical protein                                                                                 | -0.89858 | 0.01303  | down |
| PAS_chr2-1_0360 | Putative protein with sequence similarity to hydroxyacid dehydrogenases                              | -0.85009 | 0.00501  | down |
| PAS_chr2-1_0369 | Ubiquitin-protein ligase, member of the cullin family                                                | -0.62556 | 1.05E-05 | down |

|                 |                                                                                                      |          |          |      |
|-----------------|------------------------------------------------------------------------------------------------------|----------|----------|------|
|                 | with similarity to Cdc53p and human CUL3                                                             |          |          |      |
| PAS_chr2-1_0379 | Signal recognition particle (SRP) receptor-alpha subunit                                             | -0.75071 | 3.30E-11 | down |
| PAS_chr2-1_0387 | Subunit of RNase MRP                                                                                 | -0.97197 | 0.00016  | down |
| PAS_chr2-1_0396 | Mitochondrial methionyl-tRNA synthetase (MetRS)                                                      | -0.75269 | 1.19E-05 | down |
| PAS_chr2-1_0398 | DNA repair protein Nse1                                                                              | -0.60516 | 0.008706 | down |
| PAS_chr2-1_0405 | Hypothetical protein                                                                                 | -0.70185 | 1.84E-05 | down |
| PAS_chr2-1_0414 | Cytoplasmic RNA-binding protein, contains an RNA recognition motif (RRM)                             | -0.622   | 3.29E-05 | down |
| PAS_chr2-1_0421 | ER protein with chaperone and co-chaperone activity, involved in retention of resident ER proteins   | -0.6884  | 1.27E-06 | down |
| PAS_chr2-1_0430 | Essential subunit of the COMPASS (Set1C) complex                                                     | -0.85659 | 0.000587 | down |
| PAS_chr2-1_0436 | Putative RNA binding protein                                                                         | -0.64548 | 1.83E-06 | down |
| PAS_chr2-1_0443 | Hypothetical protein                                                                                 | -1.13841 | 0.000145 | down |
| PAS_chr2-1_0444 | Hypothetical protein                                                                                 | -0.75265 | 1.41E-09 | down |
| PAS_chr2-1_0455 | Protein required for assembly of U2 snRNP into the spliceosome, forms a complex with Hsh49p and Hsh1 | -0.64778 | 0.001669 | down |
| PAS_chr2-1_0458 | Peroxis 20                                                                                           | -0.99574 | 1.68E-09 | down |
| PAS_chr2-1_0499 | RNA binding protein required for maturation of tRNA and snRNA precursors                             | -0.75954 | 0.006084 | down |
| PAS_chr2-1_0509 | Putative protein of unknown function                                                                 | -0.70283 | 2.43E-10 | down |
| PAS_chr2-1_0528 | Hypothetical protein                                                                                 | -0.85721 | 0.002699 | down |
| PAS_chr2-1_0544 | Hypothetical protein                                                                                 | -1.01161 | 0.006492 | down |
| PAS_chr2-1_0572 | AAA-type ATPase that is regulated by Vta1p                                                           | -0.72193 | 6.77E-07 | down |
| PAS_chr2-1_0574 | Component of CORVET tethering complex                                                                | -0.60151 | 0.004458 | down |
| PAS_chr2-1_0585 | Cis-golgi localized monothiol glutaredoxin that binds an iron-sulfur cluster                         | -0.89359 | 1.89E-13 | down |
| PAS_chr2-1_0590 | Cytoplasmic protein of unknown function predicted to encode a DNA-3-methyladenine glycosidase II     | -0.6013  | 0.001917 | down |
| PAS_chr2-1_0595 | Calcineurin B                                                                                        | -0.64802 | 0.046803 | down |
| PAS_chr2-1_0597 | Hypothetical protein                                                                                 | -0.62651 | 8.71E-08 | down |
| PAS_chr2-1_0601 | Conserved nuclear regulatory subunit of Glc7p type 1 protein serine-threonine phosphatase (PP1)      | -0.86361 | 1.86E-14 | down |
| PAS_chr2-1_0605 | Putative Nedd8 ligase                                                                                | -1.08216 | 5.87E-10 | down |
| PAS_chr2-1_0611 | DNA Polymerase phi                                                                                   | -0.65879 | 2.25E-11 | down |
| PAS_chr2-1_0613 | Mitochondrial inner membrane half-type ATP-binding cassette (ABC) transporter                        | -0.79283 | 2.43E-06 | down |
| PAS_chr2-1_0617 | Nuclear pore protein involved in nuclear export of pre-tRNA                                          | -0.62905 | 2.62E-05 | down |
| PAS_chr2-1_0627 | Non-SMC subunit of the condensin complex (Smc2p-Smc4p-Ycs4p-Brn1p-Ycg1p)                             | -0.76229 | 2.82E-05 | down |
| PAS_chr2-1_0629 | Protein involved in transcription-coupled repair nucleotide excision repair of UV-induced DNA lesion | -0.60611 | 9.09E-06 | down |
| PAS_chr2-1_0630 | Microtubule effector required for tubulin heterodimer formation                                      | -0.72165 | 0.005155 | down |
| PAS_chr2-1_0642 | Hypothetical protein                                                                                 | -0.73953 | 1.58E-10 | down |
| PAS_chr2-1_0653 | Mitochondrial cruciform cutting endonuclease                                                         | -1.2171  | 2.42E-06 | down |
| PAS_chr2-1_0665 | Hypothetical protein                                                                                 | -0.59475 | 0.000233 | down |
| PAS_chr2-1_0672 | Scaffold protein responsible for pre-autophagosomal structure organization                           | -0.59914 | 0.015449 | down |
| PAS_chr2-1_0674 | Constituent of Paf1 complex with RNA polymerase II, Paf1p, Hpr1p, Ctr9, Leo1, Rtf1 and Ccr4p         | -0.80588 | 3.26E-09 | down |
| PAS_chr2-1_0683 | Mitochondrial ribosomal protein of the small subunit                                                 | -0.92341 | 6.62E-08 | down |
| PAS_chr2-1_0688 | Essential protein involved in transcription regulation                                               | -0.60851 | 1.15E-10 | down |
| PAS_chr2-1_0697 | Catalytic subunit of DNA polymerase zeta, which is involved in DNA repair and translesion synthesis  | -0.74152 | 3.85E-05 | down |
| PAS_chr2-1_0702 | Protein that recognizes and binds damaged DNA during nucleotide excision repair                      | -0.7051  | 2.15E-07 | down |
| PAS_chr2-1_0704 | Protein of unknown function                                                                          | -0.8843  | 0.002543 | down |
| PAS_chr2-1_0706 | Putative protein of unknown function                                                                 | -0.79948 | 1.35E-15 | down |
| PAS_chr2-1_0708 | Mitochondrial inner membrane protein                                                                 | -0.69425 | 0.000187 | down |
| PAS_chr2-1_0711 | Hypothetical protein                                                                                 | -0.66366 | 0.033403 | down |
| PAS_chr2-1_0720 | Component of both the SWI/SNF and RSC chromatin                                                      | -0.83941 | 3.88E-14 | down |

|                 | remodeling complexes                                                                                 |          |          |      |
|-----------------|------------------------------------------------------------------------------------------------------|----------|----------|------|
| PAS_chr2-1_0724 | Hypothetical protein                                                                                 | -1.14953 | 0.000493 | down |
| PAS_chr2-1_0737 | Hypothetical protein                                                                                 | -0.81558 | 9.83E-20 | down |
| PAS_chr2-1_0741 | Translation initiation factor eIF1A                                                                  | -0.69115 | 2.10E-05 | down |
| PAS_chr2-1_0748 | Hypothetical protein                                                                                 | -0.64423 | 3.15E-13 | down |
| PAS_chr2-1_0753 | Alpha-1,2-mannosidase involved in ER quality control                                                 | -0.89811 | 1.03E-14 | down |
| PAS_chr2-1_0759 | Mannosyltransferase, involved in asparagine-linked glycosylation in the endoplasmic reticulum (ER)   | -0.73299 | 4.55E-10 | down |
| PAS_chr2-1_0774 | Subunit of TRAPP (transport protein particle)                                                        | -1.1234  | 1.11E-22 | down |
| PAS_chr2-1_0781 | Nucleolar protein, component of the small subunit (SSU) processome                                   | -0.7253  | 4.51E-07 | down |
| PAS_chr2-1_0789 | Subunit of the membrane-associated retromer complex essential for endosome-to-Golgi retrograde prote | -0.60572 | 0.000182 | down |
| PAS_chr2-1_0790 | Hypothetical protein                                                                                 | -0.62102 | 0.015498 | down |
| PAS_chr2-1_0796 | Protein localized to COPII-coated vesicles, forms a complex with Erv41p                              | -0.80811 | 1.10E-12 | down |
| PAS_chr2-1_0818 | hypothetical protein                                                                                 | -0.84784 | 0.013528 | down |
| PAS_chr2-1_0821 | hypothetical protein                                                                                 | -0.74049 | 5.11E-08 | down |
| PAS_chr2-1_0825 | hypothetical protein                                                                                 | -0.6172  | 6.44E-10 | down |
| PAS_chr2-1_0832 | hypothetical protein                                                                                 | -0.64036 | 0.000128 | down |
| PAS_chr2-1_0838 | hypothetical protein                                                                                 | -0.80677 | 0.000991 | down |
| PAS_chr2-1_0845 | hypothetical protein                                                                                 | -0.77307 | 6.60E-08 | down |
| PAS_chr2-1_0854 | hypothetical protein                                                                                 | -0.71864 | 3.78E-06 | down |
| PAS_chr2-1_0870 | hypothetical protein                                                                                 | -0.65449 | 0.002266 | down |
| PAS_chr2-1_0883 | hypothetical protein                                                                                 | -0.78274 | 0.006118 | down |
| PAS_chr2-2_0012 | Hypothetical protein                                                                                 | -0.65608 | 0.030879 | down |
| PAS_chr2-2_0015 | One of several homologs of bacterial chaperone DnaJ, located in the ER lumen                         | -0.72277 | 0.081553 | down |
| PAS_chr2-2_0018 | Protein of unknown function                                                                          | -0.78433 | 1.50E-06 | down |
| PAS_chr2-2_0031 | Protein of unknown function                                                                          | -1.04715 | 0.009988 | down |
| PAS_chr2-2_0051 | Putative protein of unknown function                                                                 | -0.69769 | 8.91E-07 | down |
| PAS_chr2-2_0068 | Nuclear actin-related protein involved in chromatin remodeling                                       | -0.73216 | 4.54E-16 | down |
| PAS_chr2-2_0072 | Protein of unknown function that may interact with ribosomes                                         | -0.61367 | 1.71E-12 | down |
| PAS_chr2-2_0085 | Cytosolic J-domain-containing protein                                                                | -0.90306 | 7.23E-10 | down |
| PAS_chr2-2_0092 | Chaperone that specifically facilitates the assembly of cytochrome c oxidase                         | -0.62399 | 0.004947 | down |
| PAS_chr2-2_0096 | Integral inner mitochondrial membrane protein                                                        | -0.66149 | 1.94E-13 | down |
| PAS_chr2-2_0106 | Possible U3 snoRNP protein                                                                           | -0.84137 | 0.007853 | down |
| PAS_chr2-2_0122 | Mitochondrial matrix protein                                                                         | -0.68128 | 4.29E-08 | down |
| PAS_chr2-2_0126 | Presequence translocase-associated motor subunit                                                     | -0.65531 | 6.33E-08 | down |
| PAS_chr2-2_0130 | Essential protein involved in maturation of 18S rRNA                                                 | -0.86805 | 0.002887 | down |
| PAS_chr2-2_0151 | Type II HSP40 co-chaperone that interacts with the HSP70 protein Ssa1p                               | -0.7468  | 5.01E-10 | down |
| PAS_chr2-2_0152 | Hypothetical protein                                                                                 | -0.64594 | 2.65E-07 | down |
| PAS_chr2-2_0166 | JmjC domain family histone demethylase                                                               | -0.68925 | 1.07E-09 | down |
| PAS_chr2-2_0172 | Protein that interacts with mitotic cyclin Clb2p                                                     | -0.6558  | 6.97E-13 | down |
| PAS_chr2-2_0189 | Putative protein of unknown function with similarity to proteins containing WD-40 domains            | -0.86533 | 0.000387 | down |
| PAS_chr2-2_0190 | Essential subunit of RNA polymerase III transcription factor (TFIIB), which is involved in transcri  | -0.72968 | 0.00013  | down |
| PAS_chr2-2_0208 | Hypothetical protein                                                                                 | -0.66241 | 1.08E-11 | down |
| PAS_chr2-2_0209 | Protein with similarity to tRNA synthetases                                                          | -0.72904 | 0.000579 | down |
| PAS_chr2-2_0215 | 3'-&gt;5' exonuclease and endonuclease with a possible role in apoptosis                             | -1.22348 | 1.28E-13 | down |
| PAS_chr2-2_0216 | Type 2C protein phosphatase                                                                          | -0.73912 | 2.79E-17 | down |
| PAS_chr2-2_0227 | Subunit d of the five-subunit V0 integral membrane domain of vacuolar H+-ATPase (V-ATPase)           | -0.82332 | 1.58E-13 | down |
| PAS_chr2-2_0246 | Subunit of the HIR complex, a nucleosome assembly                                                    | -0.70151 | 4.04E-07 | down |

|                 |                                                                                                      |          |          |      |
|-----------------|------------------------------------------------------------------------------------------------------|----------|----------|------|
|                 | complex involved in histone gene transcription                                                       |          |          |      |
| PAS_chr2-2_0250 | Subunit of the tRNA splicing endonuclease, which is composed of Sen2p, Sen15p, Sen34p, and Sen54p    | -0.59074 | 0.046128 | down |
| PAS_chr2-2_0261 | Hypothetical protein                                                                                 | -0.69264 | 1.10E-06 | down |
| PAS_chr2-2_0284 | Transcriptional regulator involved in glucose repression of Gal4p-regulated genes                    | -0.72456 | 9.02E-08 | down |
| PAS_chr2-2_0285 | Hypothetical protein                                                                                 | -0.66788 | 5.88E-08 | down |
| PAS_chr2-2_0312 | Hypothetical protein                                                                                 | -0.6285  | 0.020319 | down |
| PAS_chr2-2_0321 | Hypothetical protein                                                                                 | -0.80165 | 3.18E-06 | down |
| PAS_chr2-2_0324 | Hypothetical protein                                                                                 | -0.6757  | 5.31E-07 | down |
| PAS_chr2-2_0341 | Metalloprotease subunit of the 19S regulatory particle of the 26S proteasome lid                     | -0.79284 | 7.21E-17 | down |
| PAS_chr2-2_0347 | GTP-binding protein of the ras superfamily required for bud site selection                           | -0.85615 | 4.71E-10 | down |
| PAS_chr2-2_0369 | Hypothetical protein                                                                                 | -1.04631 | 0.018473 | down |
| PAS_chr2-2_0373 | Protein with a role in umylation and in invasive and pseudohyphal growth                             | -0.80898 | 1.80E-05 | down |
| PAS_chr2-2_0376 | Hypothetical protein                                                                                 | -0.74802 | 9.52E-06 | down |
| PAS_chr2-2_0401 | Cholinephosphate cytidylyltransferase, also known as CTP:phosphocholine cytidylyltransferase         | -0.83892 | 4.35E-08 | down |
| PAS_chr2-2_0424 | Splicing factor, component of the U4/U6-U5 snRNP complex                                             | -0.64195 | 0.003854 | down |
| PAS_chr2-2_0434 | RNA polymerase subunit ABC23, common to RNA polymerases I, II, and III                               | -0.83422 | 4.15E-06 | down |
| PAS_chr2-2_0439 | Putative protein of unknown function                                                                 | -1.02585 | 5.32E-08 | down |
| PAS_chr2-2_0442 | Hypothetical protein                                                                                 | -0.75846 | 1.10E-11 | down |
| PAS_chr2-2_0443 | Protein that recognizes and binds damaged DNA in an ATP-dependent manner (with Rad16p)               | -0.90125 | 1.61E-25 | down |
| PAS_chr2-2_0450 | hypothetical protein                                                                                 | -0.64239 | 0.0109   | down |
| PAS_chr2-2_0453 | hypothetical protein                                                                                 | -1.3399  | 1.28E-06 | down |
| PAS_chr2-2_0486 | hypothetical protein                                                                                 | -0.70997 | 0.003535 | down |
| PAS_chr3_0012   | Hypothetical protein                                                                                 | -0.58899 | 0.037987 | down |
| PAS_chr3_0043   | peroxisomal integral membrane protein                                                                | -0.80002 | 8.26E-19 | down |
| PAS_chr3_0047   | Nuclear actin-related protein involved in chromatin remodeling, component of chromatin-remodeling en | -0.80026 | 1.12E-05 | down |
| PAS_chr3_0048   | Essential t-SNARE that forms a complex with Tlg2p and Vti1p and mediates fusion of endosome-derived  | -0.73921 | 2.90E-07 | down |
| PAS_chr3_0057   | Hypothetical protein                                                                                 | -0.59116 | 0.075767 | down |
| PAS_chr3_0074   | Protein that acts together with Uba3p to activate Rub1p before its conjugation to proteins (neddylat | -0.58745 | 1.29E-06 | down |
| PAS_chr3_0112   | Essential serine kinase involved in cell cycle progression and processing of the 20S pre-rRNA into m | -0.84742 | 0.05323  | down |
| PAS_chr3_0114   | Hypothetical protein                                                                                 | -0.78224 | 1.10E-05 | down |
| PAS_chr3_0118   | One of six subunits of RNA polymerase III transcription initiation factor complex (TFIIIC)           | -0.58976 | 0.000553 | down |
| PAS_chr3_0200   | Sumoylated protein of unknown function                                                               | -0.64152 | 1.59E-05 | down |
| PAS_chr3_0210   | Subunit of the vacuole fusion and protein sorting HOPS complex and the CORVET tethering complex      | -0.91932 | 5.06E-13 | down |
| PAS_chr3_0224   | DNA-dependent ATPase                                                                                 | -0.86906 | 8.05E-17 | down |
| PAS_chr3_0235   | Zinc-finger protein of unknown function                                                              | -0.68591 | 3.23E-06 | down |
| PAS_chr3_0240   | Essential protein required for biogenesis of 40S (small) ribosomal subunit                           | -0.84019 | 1.65E-09 | down |
| PAS_chr3_0242   | Topoisomerase I                                                                                      | -0.60003 | 4.68E-05 | down |
| PAS_chr3_0244   | RNA polymerase II subunit B12.5                                                                      | -0.84438 | 0.00823  | down |
| PAS_chr3_0262   | Thymidylate and uridylate kinase                                                                     | -0.60179 | 0.000179 | down |
| PAS_chr3_0263   | Mitochondrial outer membrane protein                                                                 | -0.62698 | 2.88E-06 | down |
| PAS_chr3_0269   | Protein required for sorting proteins to the vacuole                                                 | -0.88172 | 5.68E-06 | down |
| PAS_chr3_0276   | Hypothetical protein                                                                                 | -0.76911 | 0.000679 | down |
| PAS_chr3_0280   | Protein of unknown function                                                                          | -0.68821 | 3.86E-06 | down |
| PAS_chr3_0312   | Component of the ESCRT-II complex                                                                    | -0.68983 | 0.000438 | down |
| PAS_chr3_0325   | Essential spliceosome assembly factor                                                                | -0.96312 | 1.80E-10 | down |

|               |                                                                                                        |          |          |      |
|---------------|--------------------------------------------------------------------------------------------------------|----------|----------|------|
| PAS_chr3_0359 | Ubiquitin-conjugating enzyme (E2)                                                                      | -0.88591 | 9.43E-09 | down |
| PAS_chr3_0362 | Hypothetical protein                                                                                   | -0.99898 | 1.46E-06 | down |
| PAS_chr3_0374 | Hypothetical protein                                                                                   | -0.80079 | 1.41E-19 | down |
| PAS_chr3_0390 | Subunit of RAVE (Rav1p, Rav2p, Skp1p)                                                                  | -1.29486 | 4.41E-16 | down |
| PAS_chr3_0399 | Minor sphingoid long-chain base kinase                                                                 | -0.71197 | 7.17E-09 | down |
| PAS_chr3_0400 | Hypothetical protein                                                                                   | -0.8329  | 3.90E-06 | down |
| PAS_chr3_0426 | Protein involved in homologous recombination in mitochondria and in transcription regulation in nuclei | -0.72966 | 9.21E-07 | down |
| PAS_chr3_0431 | Subunit of the Nsp1p-Nup57p-Nup49p-Nic96p subcomplex of the nuclear pore complex (NPC)                 | -0.70177 | 3.39E-09 | down |
| PAS_chr3_0433 | Subunit of the RES complex                                                                             | -0.73772 | 0.000765 | down |
| PAS_chr3_0457 | Essential, non-ATPase regulatory subunit of the 26S proteasome                                         | -1.14877 | 2.31E-27 | down |
| PAS_chr3_0472 | Hypothetical protein                                                                                   | -0.75698 | 0.057986 | down |
| PAS_chr3_0477 | Hypothetical protein                                                                                   | -0.65019 | 0.033544 | down |
| PAS_chr3_0480 | Putative chaperone, homolog of E. coli DnaJ, closely related to Ydj1p                                  | -0.68798 | 4.06E-05 | down |
| PAS_chr3_0485 | Cytoplasmic protein required for cytoplasm to vacuole targeting of proteins                            | -0.91462 | 5.15E-11 | down |
| PAS_chr3_0494 | Hypothetical protein                                                                                   | -0.59576 | 1.33E-10 | down |
| PAS_chr3_0540 | Subunit of the cohesin complex                                                                         | -0.82431 | 1.80E-16 | down |
| PAS_chr3_0552 | UDP-glucose:dolichyl-phosphate glucosyltransferase                                                     | -0.8361  | 4.78E-05 | down |
| PAS_chr3_0603 | Protein involved in rRNA processing                                                                    | -0.9252  | 1.97E-09 | down |
| PAS_chr3_0608 | Protein serine/threonine phosphatase with similarity to human phosphatase PP5                          | -0.96472 | 7.18E-11 | down |
| PAS_chr3_0609 | Beta (RNA 5'-triphosphatase) subunit of the mRNA capping enzyme                                        | -0.64849 | 0.000752 | down |
| PAS_chr3_0642 | Subunit of the SF3a splicing factor complex, required for spliceosome assembly                         | -0.8687  | 0.005089 | down |
| PAS_chr3_0644 | RNA helicase in the DEAD-box family, necessary for prespliceosome formation                            | -0.63672 | 9.38E-06 | down |
| PAS_chr3_0652 | NAP family histone chaperone                                                                           | -0.83946 | 0.029003 | down |
| PAS_chr3_0678 | Protein that interacts with the karyopherin Srp1p                                                      | -0.9902  | 9.34E-08 | down |
| PAS_chr3_0680 | Hypothetical protein                                                                                   | -0.96439 | 1.32E-05 | down |
| PAS_chr3_0682 | Cytoplasmic protein required for replication of Brome mosaic virus in S. cerevisiae                    | -0.88696 | 2.92E-09 | down |
| PAS_chr3_0683 | Essential nucleolar protein that is a component of the SSU (small subunit) processome                  | -0.61425 | 0.011205 | down |
| PAS_chr3_0699 | Alpha 7 subunit of the 20S proteasome                                                                  | -0.6888  | 8.75E-11 | down |
| PAS_chr3_0723 | Hypothetical protein                                                                                   | -0.81322 | 1.22E-06 | down |
| PAS_chr3_0725 | Protein with a role in ubiquinone (Coenzyme Q) biosynthesis                                            | -0.60101 | 7.49E-10 | down |
| PAS_chr3_0734 | Hypothetical protein                                                                                   | -0.65968 | 4.68E-05 | down |
| PAS_chr3_0737 | TFIIE small subunit, involved in RNA polymerase II transcription initiation                            | -0.64172 | 0.000219 | down |
| PAS_chr3_0748 | Beta 1 subunit of the 20S proteasome, responsible for cleavage after acidic residues in peptides       | -0.60968 | 1.82E-08 | down |
| PAS_chr3_0753 | Protein involved in rRNA processing                                                                    | -1.11357 | 4.50E-08 | down |
| PAS_chr3_0785 | Putative protein of unknown function                                                                   | -1.06682 | 0.01062  | down |
| PAS_chr3_0812 | Hypothetical protein                                                                                   | -0.71622 | 3.01E-06 | down |
| PAS_chr3_0871 | Hypothetical protein                                                                                   | -0.74277 | 8.08E-12 | down |
| PAS_chr3_0885 | Nucleolar protein, component of the small subunit (SSU) processome containing the U3 snoRNA            | -0.9099  | 2.30E-11 | down |
| PAS_chr3_0903 | Nucleolar protein                                                                                      | -0.76427 | 7.30E-08 | down |
| PAS_chr3_0913 | Component of the mitotic spindle that binds to interpolar microtubules                                 | -0.6378  | 0.001942 | down |
| PAS_chr3_0956 | Protein involved in rRNA processing                                                                    | -0.7211  | 0.001424 | down |
| PAS_chr3_0989 | t-SNARE required for ER membrane fusion and vesicular traffic                                          | -0.78206 | 1.62E-05 | down |
| PAS_chr3_1006 | Essential, conserved, cytoplasmic ATPase                                                               | -0.72711 | 7.46E-08 | down |
| PAS_chr3_1008 | Hypothetical protein                                                                                   | -1.27539 | 1.66E-30 | down |
| PAS_chr3_1012 | Ketopantoate hydroxymethyltransferase, required for pantothenic acid biosynthesis                      | -0.71166 | 9.87E-05 | down |



|               |                                                                                                      |          |          |      |
|---------------|------------------------------------------------------------------------------------------------------|----------|----------|------|
| PAS_chr3_1034 | Hypothetical protein                                                                                 | -0.63768 | 6.36E-10 | down |
| PAS_chr3_1035 | Component of the Paf1p complex                                                                       | -0.62408 | 0.033575 | down |
| PAS_chr3_1042 | Catalytic component of the exosome, involved in RNA processing and degradation                       | -0.59494 | 1.02E-07 | down |
| PAS_chr3_1052 | Putative protein of unknown function                                                                 | -1.14156 | 7.15E-16 | down |
| PAS_chr3_1060 | Hypothetical protein                                                                                 | -0.59155 | 0.004756 | down |
| PAS_chr3_1064 | Protein with putative serine active lipase domain                                                    | -0.75944 | 1.10E-05 | down |
| PAS_chr3_1068 | Protein of unknown function that associates with ribosomes                                           | -0.62625 | 1.71E-06 | down |
| PAS_chr3_1069 | Essential, non-ATPase regulatory subunit of the 26S proteasome lid                                   | -1.0086  | 1.77E-24 | down |
| PAS_chr3_1073 | Peroxisomal membrane protein (PMP)                                                                   | -0.60824 | 3.12E-06 | down |
| PAS_chr3_1078 | Subunit of the anaphase-promoting complex/cyclosome (APC/C)                                          | -0.95488 | 2.37E-07 | down |
| PAS_chr3_1091 | Protein kinase implicated in activation of the plasma membrane H(+)-ATPase Pma1p                     | -0.61055 | 6.66E-08 | down |
| PAS_chr3_1100 | Subunit of a tRNA methyltransferase complex composed of Trm8p and Trm82p                             | -0.60224 | 0.013458 | down |
| PAS_chr3_1103 | Component of the pre-60S pre-ribosomal particle                                                      | -0.89504 | 0.000805 | down |
| PAS_chr3_1110 | Mitochondrial tyrosyl-tRNA synthetase                                                                | -0.91919 | 5.34E-14 | down |
| PAS_chr3_1115 | Mannose-6-phosphate isomerase, catalyzes the interconversion of fructose-6-P and mannose-6-P         | -0.59657 | 8.40E-11 | down |
| PAS_chr3_1151 | hypothetical protein                                                                                 | -0.62097 | 0.01021  | down |
| PAS_chr3_1152 | hypothetical protein                                                                                 | -0.87451 | 4.51E-07 | down |
| PAS_chr3_1163 | hypothetical protein                                                                                 | -0.67866 | 0.001469 | down |
| PAS_chr3_1165 | hypothetical protein                                                                                 | -0.87625 | 1.01E-06 | down |
| PAS_chr3_1172 | hypothetical protein                                                                                 | -0.69563 | 0.000175 | down |
| PAS_chr3_1177 | hypothetical protein                                                                                 | -0.6189  | 4.21E-13 | down |
| PAS_chr3_1178 | hypothetical protein                                                                                 | -0.72791 | 0.00037  | down |
| PAS_chr3_1186 | hypothetical protein                                                                                 | -0.62941 | 0.000694 | down |
| PAS_chr3_1202 | hypothetical protein                                                                                 | -0.96122 | 4.46E-06 | down |
| PAS_chr3_1209 | hypothetical protein                                                                                 | -0.60553 | 2.54E-12 | down |
| PAS_chr3_1211 | hypothetical protein                                                                                 | -1.00359 | 0.001145 | down |
| PAS_chr3_1213 | hypothetical protein                                                                                 | -0.64524 | 0.000675 | down |
| PAS_chr3_1230 | ATG30                                                                                                | -0.69321 | 2.47E-09 | down |
| PAS_chr3_1251 | hypothetical protein                                                                                 | -0.75067 | 0.003314 | down |
| PAS_chr3_1252 | hypothetical protein                                                                                 | -0.72974 | 2.55E-05 | down |
| PAS_chr3_1253 | hypothetical protein                                                                                 | -0.63335 | 0.011209 | down |
| PAS_chr4_0008 | Low-affinity Fe(II) transporter of the plasma membrane                                               | -0.62578 | 0.005046 | down |
| PAS_chr4_0014 | Hypothetical protein                                                                                 | -0.70658 | 1.81E-13 | down |
| PAS_chr4_0028 | Subunit of the GINS complex (Sld5p, Psf1p, Psf2p, Psf3p)                                             | -0.76631 | 0.003831 | down |
| PAS_chr4_0068 | Hypothetical protein                                                                                 | -0.97744 | 0.003161 | down |
| PAS_chr4_0069 | Nucleosome assembly factor, involved in chromatin assembly and disassembly                           | -0.5942  | 0.000432 | down |
| PAS_chr4_0073 | Component of the conserved oligomeric Golgi complex (Cog1p through Cog8p)                            | -0.68588 | 0.000245 | down |
| PAS_chr4_0078 | Essential protein with dual roles in spliceosome assembly and exocytosis                             | -0.68438 | 9.43E-05 | down |
| PAS_chr4_0125 | Hypothetical protein                                                                                 | -1.32966 | 2.50E-08 | down |
| PAS_chr4_0129 | Hypothetical protein                                                                                 | -0.89478 | 0.000315 | down |
| PAS_chr4_0136 | Subunit of the histone deacetylase Rpd3L complex                                                     | -0.90139 | 6.94E-07 | down |
| PAS_chr4_0150 | Aspartate kinase (L-aspartate 4-P-transferase)                                                       | -0.81637 | 3.97E-13 | down |
| PAS_chr4_0165 | GTPase, Ras-like GTP binding protein involved in the secretory pathway                               | -0.68127 | 4.45E-06 | down |
| PAS_chr4_0172 | E3 ubiquitin ligase for Rad6p                                                                        | -0.6048  | 0.001929 | down |
| PAS_chr4_0217 | Protein of unknown function that associates with ribosomes                                           | -1.2494  | 2.62E-26 | down |
| PAS_chr4_0225 | Gamma subunit of coatomer, a heptameric protein complex that together with Arf1p forms the COPI coat | -0.64022 | 1.53E-12 | down |

|               |                                                                                                     |          |          |      |
|---------------|-----------------------------------------------------------------------------------------------------|----------|----------|------|
| PAS_chr4_0229 | Catalytic subunit of TRAMP (Trf4/Pap2p-Mtr4p-Air1p/2p)                                              | -0.59191 | 0.01949  | down |
| PAS_chr4_0230 | Hypothetical protein                                                                                | -1.33901 | 0.009009 | down |
| PAS_chr4_0231 | Putative nucleolar DEAD box RNA helicase                                                            | -0.77796 | 2.32E-09 | down |
| PAS_chr4_0242 | Nuclear type II J heat shock protein of the E. coli dnaJ family                                     | -0.83848 | 1.25E-12 | down |
| PAS_chr4_0244 | Hypothetical protein                                                                                | -0.75897 | 0.002355 | down |
| PAS_chr4_0257 | Putative protein of unknown function                                                                | -0.59403 | 8.32E-06 | down |
| PAS_chr4_0278 | Protein involved in pre-rRNA processing, 18S rRNA synthesis, and snoRNA synthesis                   | -0.77113 | 6.08E-07 | down |
| PAS_chr4_0293 | Component of the septin ring of the mother-bud neck that is required for cytokinesis                | -0.87916 | 1.95E-12 | down |
| PAS_chr4_0299 | Hypothetical protein                                                                                | -0.70852 | 0.004449 | down |
| PAS_chr4_0317 | Hypothetical protein                                                                                | -0.66933 | 0.002191 | down |
| PAS_chr4_0319 | N-acetyltransferase, confers resistance to the sphingolipid biosynthesis inhibitor myriocin (ISP-1) | -0.98849 | 3.30E-06 | down |
| PAS_chr4_0320 | Hypothetical protein                                                                                | -0.60793 | 1.09E-10 | down |
| PAS_chr4_0387 | One of six ATPases of the 19S regulatory particle of the 26S proteasome                             | -1.02025 | 8.75E-28 | down |
| PAS_chr4_0388 | Mitochondrial ribosomal protein of the large subunit                                                | -0.8443  | 9.43E-05 | down |
| PAS_chr4_0389 | Large subunit of the dynactin complex                                                               | -0.62057 | 0.009848 | down |
| PAS_chr4_0426 | Hypothetical protein                                                                                | -0.93303 | 1.07E-06 | down |
| PAS_chr4_0435 | Subunit of the RNA polymerase II mediator complex                                                   | -1.37582 | 0.000124 | down |
| PAS_chr4_0436 | RING finger containing subunit of Skp1-Cullin-F-box ubiquitin protein ligases (SCF)                 | -0.75105 | 2.06E-05 | down |
| PAS_chr4_0438 | Heat shock protein with a zinc finger motif                                                         | -0.74694 | 1.05E-05 | down |
| PAS_chr4_0442 | Subunit of the heme-activated, glucose-repressed Hap2p/3p/4p/5p CCAAT-binding complex               | -0.97662 | 2.53E-07 | down |
| PAS_chr4_0450 | Hypothetical protein                                                                                | -0.76478 | 1.96E-10 | down |
| PAS_chr4_0451 | Hypothetical protein                                                                                | -0.73334 | 1.41E-12 | down |
| PAS_chr4_0502 | Putative protein of unknown function                                                                | -0.72646 | 0.055815 | down |
| PAS_chr4_0518 | TFIIIF (Transcription Factor II) largest subunit                                                    | -0.71921 | 8.65E-09 | down |
| PAS_chr4_0520 | Hypothetical protein                                                                                | -0.82049 | 0.000163 | down |
| PAS_chr4_0538 | Splicing factor, component of the U4/U6-U5 snRNP complex                                            | -0.71175 | 0.000914 | down |
| PAS_chr4_0541 | Protein that forms a complex with the Sit4p protein phosphatase and is required for its function    | -0.77132 | 3.03E-05 | down |
| PAS_chr4_0547 | Hypothetical protein                                                                                | -0.72057 | 0.060161 | down |
| PAS_chr4_0548 | Component of the septin ring of the mother-bud neck that is required for cytokinesis                | -0.64907 | 6.21E-09 | down |
| PAS_chr4_0549 | Hypothetical protein                                                                                | -0.6965  | 9.37E-06 | down |
| PAS_chr4_0597 | Hypothetical protein                                                                                | -0.75467 | 1.61E-09 | down |
| PAS_chr4_0599 | Subunit of a possibly tetrameric trichostatin A-sensitive class II histone deacetylase complex      | -0.8253  | 0.0003   | down |
| PAS_chr4_0606 | Guanine nucleotide exchange factor (GEF)                                                            | -0.64202 | 3.51E-09 | down |
| PAS_chr4_0615 | Putative S-adenosylmethionine-dependent methyltransferase of the seven beta-strand family           | -0.61197 | 0.000565 | down |
| PAS_chr4_0629 | GTPase-activating protein (RhoGAP) for Cdc42p and Rho5p                                             | -1.04073 | 4.08E-10 | down |
| PAS_chr4_0631 | Hypothetical protein                                                                                | -0.62152 | 0.000585 | down |
| PAS_chr4_0650 | Hypothetical protein                                                                                | -0.83107 | 1.97E-05 | down |
| PAS_chr4_0653 | Protein integral to the mitochondrial membrane                                                      | -0.73471 | 6.80E-07 | down |
| PAS_chr4_0659 | Subunit of the RNA polymerase II mediator complex                                                   | -0.6805  | 0.000121 | down |
| PAS_chr4_0661 | 66S preribosome component MAK16                                                                     | -0.7002  | 0.000327 | down |
| PAS_chr4_0670 | Hypothetical protein                                                                                | -0.8569  | 0.027565 | down |
| PAS_chr4_0700 | Phospholipase C                                                                                     | -0.60177 | 0.020597 | down |
| PAS_chr4_0706 | Hypothetical protein                                                                                | -0.7054  | 0.000833 | down |
| PAS_chr4_0716 | Nucleolar protein involved in rRNA processing and 60S ribosomal subunit biogenesis                  | -0.60549 | 7.59E-05 | down |
| PAS_chr4_0717 | Essential conserved protein that is part of the 90S preribosome                                     | -0.83431 | 4.15E-07 | down |
| PAS_chr4_0719 | GTPase activating protein (GAP) for Gsp1p, involved in nuclear transport                            | -0.65943 | 3.86E-11 | down |

|               |                                                                            |          |          |      |
|---------------|----------------------------------------------------------------------------|----------|----------|------|
| PAS_chr4_0720 | Transcriptional coactivator                                                | -0.86178 | 1.76E-15 | down |
| PAS_chr4_0722 | Hypothetical protein                                                       | -0.68327 | 0.012087 | down |
| PAS_chr4_0729 | Putative protein of unknown function                                       | -0.66044 | 0.027721 | down |
| PAS_chr4_0736 | One of six ATPases of the 19S regulatory particle of the 26S proteasome    | -0.97298 | 6.38E-21 | down |
| PAS_chr4_0745 | Subunit of TFIIH and nucleotide excision repair factor 3 complexes         | -0.59547 | 0.001666 | down |
| PAS_chr4_0750 | Hypothetical protein                                                       | -0.66646 | 0.030879 | down |
| PAS_chr4_0756 | Mitochondrial protein kinase                                               | -0.60415 | 0.001337 | down |
| PAS_chr4_0791 | Beta subunit of geranylgeranyltransferase type I                           | -0.90407 | 0.00095  | down |
| PAS_chr4_0793 | Hypothetical protein                                                       | -0.68666 | 0.001665 | down |
| PAS_chr4_0803 | Nucleolar protein involved in the assembly of the large ribosomal subunit  | -0.75349 | 0.005853 | down |
| PAS_chr4_0827 | Hypothetical protein                                                       | -0.7801  | 6.31E-07 | down |
| PAS_chr4_0837 | Hypothetical protein                                                       | -1.00444 | 6.29E-08 | down |
| PAS_chr4_0854 | Hypothetical protein                                                       | -0.85112 | 0.00224  | down |
| PAS_chr4_0856 | Component, with Yta12p, of the mitochondrial inner membrane m-AAA protease | -0.65288 | 9.34E-11 | down |
| PAS_chr4_0858 | Hypothetical protein                                                       | -0.70535 | 9.04E-08 | down |
| PAS_chr4_0862 | Hypothetical protein                                                       | -0.6069  | 0.008513 | down |
| PAS_chr4_0867 | Hypothetical protein                                                       | -0.94004 | 4.22E-08 | down |
| PAS_chr4_0869 | Non-essential protein of unknown function                                  | -0.67366 | 0.002079 | down |
| PAS_chr4_0872 | Hypothetical protein                                                       | -0.9131  | 0.000692 | down |
| PAS_chr4_0876 | Hypothetical protein                                                       | -0.6168  | 0.005431 | down |
| PAS_chr4_0901 | Ribosomal RNA-processing protein                                           | -1.06723 | 5.23E-13 | down |
| PAS_chr4_0942 | hypothetical protein                                                       | -0.67101 | 0.000521 | down |
| PAS_chr4_0957 | hypothetical protein                                                       | -0.63156 | 0.01327  | down |
| PAS_chr4_0960 | hypothetical protein                                                       | -0.66718 | 6.80E-12 | down |
| PAS_chr4_0965 | hypothetical protein                                                       | -0.70259 | 0.000725 | down |
| PAS_chr4_0966 | hypothetical protein                                                       | -0.67441 | 0.000342 | down |
| PAS_chr4_0986 | hypothetical protein                                                       | -0.63244 | 5.05E-09 | down |
| PAS_chr4_0990 | hypothetical protein                                                       | -0.8912  | 8.98E-17 | down |
| PAS_chr4_0992 | hypothetical protein                                                       | -0.67236 | 4.35E-05 | down |
| PAS_chr4_1001 | hypothetical protein                                                       | -0.96833 | 0.011037 | down |

**Supplementary Table S2 Total enrichment results of biological pathways via KEGG**

| Num | Description                                 | Padjust  | Gene_names                                                                                                                                                                                                                                                                                                                                                                                                                                                                                                                                                                                                                                                                                                                                                                                                                                                                                                                                   |
|-----|---------------------------------------------|----------|----------------------------------------------------------------------------------------------------------------------------------------------------------------------------------------------------------------------------------------------------------------------------------------------------------------------------------------------------------------------------------------------------------------------------------------------------------------------------------------------------------------------------------------------------------------------------------------------------------------------------------------------------------------------------------------------------------------------------------------------------------------------------------------------------------------------------------------------------------------------------------------------------------------------------------------------|
| 60  | Ribosome                                    | 6.45E-08 | PAS_chr3_0290;PAS_chr3_1057;PAS_chr1-1_0345;PAS_chr1-4_0353;PAS_chr1-4_0352;PAS_chr2-1_0087;PAS_chr2-1_0086;PAS_chr3_0335;PAS_chr2-1_0728;PAS_chr4_0982;PAS_chr1-4_0589;PAS_chr2-2_0054;PAS_chr2-1_0683;PAS_FragB_0037;PAS_chr2-2_0229;PAS_chr1-3_0300;PAS_chr2-2_0326;PAS_chr4_0246;PAS_chr1-3_0115;PAS_chr1-3_0034;PAS_chr1-1_0183;PAS_chr4_0041;PAS_chr1-4_0422;PAS_chr2-1_0481;PAS_chr4_0107;PAS_chr1-1_0189;PAS_chr1-4_0471;PAS_chr3_0596;PAS_chr1-4_0148;PAS_chr1-1_0296;PAS_chr4_0292;PAS_chr4_0211;PAS_chr2-1_0362;PAS_chr1-1_0439;PAS_chr2-1_0482;PAS_chr4_0799;PAS_c131_0011;PAS_chr4_0813;PAS_chr1-4_0490;PAS_chr4_0412;PAS_chr4_0413;PAS_chr3_0946;PAS_chr4_0414;PAS_chr4_0456;PAS_chr3_0762;PAS_chr3_1200;PAS_chr2-2_0109;PAS_chr4_0139;PAS_chr1-1_0216;PAS_chr4_0524;PAS_chr1-1_0076;PAS_chr2-2_0257;PAS_chr3_0091;PAS_chr1-3_0068;PAS_chr3_0722;PAS_chr4_0131;PAS_chr2-1_0658;PAS_chr2-1_0022;PAS_chr2-1_0634;PAS_chr1-1_0219 |
| 16  | Methane metabolism                          | 0.001309 | PAS_chr3_0826;PAS_chr3_0834;PAS_chr1-1_0427;PAS_chr4_0416;PAS_chr4_0821;PAS_chr3_0832;PAS_chr4_0285;PAS_chr4_0587;PAS_chr3_0566;PAS_chr3_1028;PAS_chr3_0868;PAS_chr1-1_0072;PAS_chr3_0932;PAS_chr3_0082;PAS_chr3_0867;PAS_chr2-1_0657                                                                                                                                                                                                                                                                                                                                                                                                                                                                                                                                                                                                                                                                                                        |
| 16  | Alanine, aspartate and glutamate metabolism | 0.010594 | PAS_chr4_0416;PAS_chr2-2_0329;PAS_chr3_0591;PAS_chr1-1_0107;PAS_chr3_0799;PAS_chr1-3_0024;PAS_chr4_0613;PAS_chr3_0743;PAS_chr4_0677;PAS_chr1-1_0200;PAS_chr3_0675;PAS_chr4_0785;PAS_chr4_0974;PAS_chr1-4_0227;PAS_chr4_0138;PAS_chr3_0482                                                                                                                                                                                                                                                                                                                                                                                                                                                                                                                                                                                                                                                                                                    |
| 18  | Glycine, serine and threonine metabolism    | 0.01075  | PAS_chr3_0826;PAS_chr1-4_0049;PAS_chr1-1_0427;PAS_chr4_0416;PAS_chr4_0112;PAS_FragB_0009;PAS_chr4_0285;PAS_chr4_0587;PAS_chr3_0566;PAS_chr3_0349;PAS_chr4_0150;PAS_chr1-4_0489;PAS_chr2-1_0657;PAS_chr1-4_0243;PAS_chr4_0938;PAS_chr3_0634;PAS_chr2-1_0679;PAS_chr3_0899                                                                                                                                                                                                                                                                                                                                                                                                                                                                                                                                                                                                                                                                     |
| 33  | Oxidative phosphorylation                   | 0.010796 | PAS_chr3_0585;PAS_chr3_0808;PAS_chr1-1_0002;PAS_chr3_0576;PAS_chr3_0997;PAS_chr1-4_0487;PAS_chr4_0733;PAS_chr2-2_0227;PAS_chr3_0460;PAS_chr3_0615;PAS_chr4_0990;PAS_chr1-1_0309;PAS_chr2-1_0687;PAS_chr1-4_0445;PAS_chr1-3_0070;PAS_chr4_0120;PAS_chr2-2_0265;PAS_chr1-4_0371;PAS_chr2-2_0430;PAS_chr2-2_0462;PAS_chr3_0819;PAS_chr3_1040;PAS_chr2-1_0451;PAS_chr2-1_0363;PAS_chr1-1_0099;PAS_chr2-2_0266;PAS_chr3_0059;PAS_chr1-3_0194;PAS_chr1-1_0484;PAS_chr1-3_0028;PAS_chr2-2_0165;PAS_chr1-1_0191;PAS_chr4_0520                                                                                                                                                                                                                                                                                                                                                                                                                        |
| 13  | Glyoxylate and dicarboxylate metabolism     | 0.012365 | PAS_chr2-2_0131;PAS_chr4_0593;PAS_chr4_0587;PAS_FragB_0009;PAS_chr1-4_0304;PAS_chr1-1_0475;PAS_chr1-3_0104;PAS_chr4_0416;PAS_chr2-1_0238;PAS_chr3_0932;PAS_chr4_0785;PAS_chr4_0938;PAS_chr4_0815                                                                                                                                                                                                                                                                                                                                                                                                                                                                                                                                                                                                                                                                                                                                             |
| 14  | Citrate cycle (TCA cycle)                   | 0.0124   | PAS_chr2-1_0120;PAS_chr1-4_0593;PAS_chr3_0831;PAS_chr1-3_0104;PAS_chr3_0647;PAS_chr1-1_0475;PAS_chr4_0733;PAS_chr4_0580;PAS_chr2-2_0294;PAS_chr2-1_0238;PAS_chr1-1_0233;PAS_chr4_0815;PAS_chr1-1_0050;PAS_chr1-4_0487                                                                                                                                                                                                                                                                                                                                                                                                                                                                                                                                                                                                                                                                                                                        |
| 8   | Thiamine metabolism                         | 0.024381 | PAS_chr3_0648;PAS_chr4_0065;PAS_chr2-1_0111;PAS_chr1-4_0151;PAS_chr3_0257;PAS_chr2-2_0084;PAS_chr3_0842;PAS_chr3_0843                                                                                                                                                                                                                                                                                                                                                                                                                                                                                                                                                                                                                                                                                                                                                                                                                        |
| 18  | Glycolysis / Gluconeogenesis                | 0.027008 | PAS_chr3_0826;PAS_chr3_0082;PAS_chr1-1_0427;PAS_chr1-4_0264;PAS_chr3_0006;PAS_chr2-1_0472;PAS_chr4_0624;PAS_chr1-4_0292;PAS_chr1-1_0050;PAS_chr1-4_0593;PAS_chr3_0868;PAS_chr2-2_0294;PAS_chr1-1_0072;PAS_chr2-1_0437;PAS_chr4_0043;PAS_chr2-1_0853;PAS_chr3_1028;PAS_chr3_0951                                                                                                                                                                                                                                                                                                                                                                                                                                                                                                                                                                                                                                                              |
| 7   | Biosynthesis of unsaturated fatty acids     | 0.061852 | PAS_chr2-1_0072;PAS_chr4_0368;PAS_chr4_0780;PAS_chr4_0743;PAS_chr3_0222;PAS_chr4_0052;PAS_chr3_0236                                                                                                                                                                                                                                                                                                                                                                                                                                                                                                                                                                                                                                                                                                                                                                                                                                          |
| 14  | Cysteine and methionine metabolism          | 0.271326 | PAS_chr3_0404;PAS_chr1-4_0049;PAS_chr4_0815;PAS_chr3_0890;PAS_chr2-1_0358;PAS_chr3_0566;PAS_chr4_0280;PAS_chr1-4_0489;PAS_chr4_0974;PAS_chr1-1_0200;PAS_chr2-1_0657;PAS_chr4_0330;PAS_chr2-1_0238;PAS_chr4_0150                                                                                                                                                                                                                                                                                                                                                                                                                                                                                                                                                                                                                                                                                                                              |
| 4   | Nitrogen metabolism                         | 0.279164 | PAS_chr1-1_0107;PAS_chr4_0578;PAS_chr2-1_0037;PAS_chr4_0785                                                                                                                                                                                                                                                                                                                                                                                                                                                                                                                                                                                                                                                                                                                                                                                                                                                                                  |
| 8   | Arginine biosynthesis                       | 0.303115 | PAS_chr1-1_0107;PAS_chr1-1_0127;PAS_chr1-1_0200;PAS_chr3_0482;PAS_chr4_0785;PAS_chr4_0974;PAS_chr3_0623;PAS_chr3_0176                                                                                                                                                                                                                                                                                                                                                                                                                                                                                                                                                                                                                                                                                                                                                                                                                        |
| 10  | Arginine and proline metabolism             | 0.375576 | PAS_chr4_0823;PAS_chr1-3_0269;PAS_chr3_0410;PAS_chr4_0398;PAS_chr4_0665;PAS_chr2-1_0853;PAS_chr1-1_0200;PAS_chr4_0974;PAS_chr4_0043;PAS_chr1-4_0227                                                                                                                                                                                                                                                                                                                                                                                                                                                                                                                                                                                                                                                                                                                                                                                          |
| 9   | Pentose phosphate pathway                   | 0.384813 | PAS_chr3_0277;PAS_chr1-4_0150;PAS_chr2-2_0338;PAS_chr1-4_0264;PAS_chr2-2_0337;PAS_chr4_0212;PAS_chr3_0868;PAS_chr1-1_0072;PAS_chr1-4_0669                                                                                                                                                                                                                                                                                                                                                                                                                                                                                                                                                                                                                                                                                                                                                                                                    |
| 6   | Fatty acid degradation                      | 0.387705 | PAS_chr2-1_0472;PAS_chr1-4_0304;PAS_chr2-1_0853;PAS_chr1-4_0663;PAS_chr4_0043;PAS_chr3_1028                                                                                                                                                                                                                                                                                                                                                                                                                                                                                                                                                                                                                                                                                                                                                                                                                                                  |
| 6   | Lysine biosynthesis                         | 0.387705 | PAS_chr1-4_0049;PAS_chr4_0150;PAS_chr4_0795;PAS_chr2-2_0168;PAS_chr1-4_0421;PAS_chr3_0528                                                                                                                                                                                                                                                                                                                                                                                                                                                                                                                                                                                                                                                                                                                                                                                                                                                    |
| 4   | Fatty acid elongation                       | 0.422519 | PAS_chr4_0780;PAS_chr4_0368;PAS_chr3_0236;PAS_chr3_0222                                                                                                                                                                                                                                                                                                                                                                                                                                                                                                                                                                                                                                                                                                                                                                                                                                                                                      |
| 5   | Valine, leucine and                         | 0.431546 | PAS_chr1-4_0243;PAS_chr2-1_0864;PAS_chr3_0039;PAS_chr1-1_0432;PAS_chr2-1_0415                                                                                                                                                                                                                                                                                                                                                                                                                                                                                                                                                                                                                                                                                                                                                                                                                                                                |

|    |                                             |          |                                                                                                                                                                                                                                                                                                                                                                                                                                                                                                                                       |  |
|----|---------------------------------------------|----------|---------------------------------------------------------------------------------------------------------------------------------------------------------------------------------------------------------------------------------------------------------------------------------------------------------------------------------------------------------------------------------------------------------------------------------------------------------------------------------------------------------------------------------------|--|
|    | isoleucine biosynthesis                     |          |                                                                                                                                                                                                                                                                                                                                                                                                                                                                                                                                       |  |
| 5  | Butanoate metabolism                        | 0.431546 | PAS_chr2-1_0191;PAS_chr4_0677;PAS_chr1-4_0304;PAS_chr2-1_0864;PAS_chr1-3_0024                                                                                                                                                                                                                                                                                                                                                                                                                                                         |  |
| 15 | Pyruvate metabolism                         | 0.446508 | PAS_chr3_0006;PAS_chr2-1_0472;PAS_chr1-4_0304;PAS_chr3_0647;PAS_chr1-1_0050;PAS_chr1-4_0593;PAS_chr4_0336;PAS_chr2-2_0294;PAS_chr2-1_0238;PAS_chr2-1_0415;PAS_chr1-4_0421;PAS_chr4_0815;PAS_chr2-1_0853;PAS_chr3_1028;PAS_chr4_0043                                                                                                                                                                                                                                                                                                   |  |
| 4  | Selenocompound metabolism                   | 0.46835  | PAS_chr1-4_0489;PAS_chr2-1_0396;PAS_chr2-1_0358;PAS_chr1-4_0253                                                                                                                                                                                                                                                                                                                                                                                                                                                                       |  |
| 35 | Biosynthesis of cofactors                   | 0.476035 | PAS_chr2-1_0273;PAS_chr4_0065;PAS_chr2-1_0111;PAS_chr1-1_0169;PAS_chr4_0613;PAS_chr2-2_0084;PAS_chr2-2_0329;PAS_chr4_0138;PAS_chr1-3_0016;PAS_chr3_0566;PAS_chr1-4_0198;PAS_chr2-2_0303;PAS_chr3_0954;PAS_chr3_0842;PAS_chr3_0843;PAS_chr1-4_0678;PAS_chr1-3_0194;PAS_chr3_0257;PAS_chr4_0043;PAS_chr4_0940;PAS_chr3_0648;PAS_chr4_0823;PAS_chr4_0587;PAS_chr4_0418;PAS_chr4_0981;PAS_chr3_1115;PAS_chr3_1037;PAS_chr2-1_0853;PAS_chr2-2_0053;PAS_chr3_0799;PAS_chr3_0167;PAS_chr3_0870;PAS_chr3_1012;PAS_chr2-2_0059;PAS_chr2-1_0593 |  |
| 7  | Lysine degradation                          | 0.484464 | PAS_chr2-2_0152;PAS_chr1-3_0024;PAS_chr2-1_0853;PAS_chr4_0043;PAS_chr1-1_0129;PAS_chr1-4_0304;PAS_chr3_0528                                                                                                                                                                                                                                                                                                                                                                                                                           |  |
| 7  | SNARE interactions in vesicular transport   | 0.484464 | PAS_chr3_0989;PAS_chr1-1_0481;PAS_chr2-2_0453;PAS_chr1-4_0462;PAS_chr1-4_0024;PAS_chr3_0048;PAS_chr1-1_0246                                                                                                                                                                                                                                                                                                                                                                                                                           |  |
| 10 | Fructose and mannose metabolism             | 0.485521 | PAS_chr4_0341;PAS_chr4_0988;PAS_chr4_0624;PAS_chr3_1115;PAS_chr3_0868;PAS_chr1-1_0072;PAS_chr2-2_0053;PAS_chr3_0870;PAS_chr2-1_0870;PAS_chr3_0951                                                                                                                                                                                                                                                                                                                                                                                     |  |
| 8  | Pantothenate and CoA biosynthesis           | 0.518067 | PAS_chr4_0823;PAS_chr1-1_0432;PAS_chr1-4_0198;PAS_chr4_0793;PAS_chr2-1_0853;PAS_chr3_1012;PAS_chr2-1_0864;PAS_chr4_0043                                                                                                                                                                                                                                                                                                                                                                                                               |  |
| 4  | Pentose and glucuronate interconversions    | 0.521248 | PAS_chr2-2_0019;PAS_chr4_0572;PAS_chr3_0086;PAS_chr3_0744                                                                                                                                                                                                                                                                                                                                                                                                                                                                             |  |
| 2  | C5-Branched dibasic acid metabolism         | 0.526696 | PAS_chr3_0039;PAS_chr2-1_0864                                                                                                                                                                                                                                                                                                                                                                                                                                                                                                         |  |
| 12 | Proteasome                                  | 0.543227 | PAS_chr3_1069;PAS_chr4_0387;PAS_chr4_0299;PAS_chr3_0457;PAS_chr3_0699;PAS_chr4_0736;PAS_chr1-3_0195;PAS_chr2-2_0341;PAS_chr2-1_0597;PAS_chr3_0748;PAS_chr4_0668;PAS_chr1-1_0079                                                                                                                                                                                                                                                                                                                                                       |  |
| 7  | Protein export                              | 0.611889 | PAS_chr2-1_0379;PAS_chr1-4_0134;PAS_chr1-1_0274;PAS_chr1-4_0629;PAS_chr1-4_0210;PAS_chr1-4_0577;PAS_chr1-3_0202                                                                                                                                                                                                                                                                                                                                                                                                                       |  |
| 8  | Amino sugar and nucleotide sugar metabolism | 0.642909 | PAS_chr1-4_0264;PAS_chr1-1_0393;PAS_chr4_0624;PAS_chr3_1115;PAS_chr1-1_0067;PAS_chr4_0737;PAS_chr2-2_0053;PAS_chr3_0870                                                                                                                                                                                                                                                                                                                                                                                                               |  |
| 6  | Terpenoid backbone biosynthesis             | 0.655526 | PAS_chr2-1_0191;PAS_chr4_0834;PAS_chr1-4_0304;PAS_chr3_0130;PAS_chr1-3_0192;PAS_chr1-4_0429                                                                                                                                                                                                                                                                                                                                                                                                                                           |  |
| 2  | Mannose type O-glycan biosynthesis          | 0.671748 | PAS_chr2-1_0212;PAS_chr2-1_0256                                                                                                                                                                                                                                                                                                                                                                                                                                                                                                       |  |
| 2  | Monobactam biosynthesis                     | 0.671748 | PAS_chr1-4_0253;PAS_chr4_0150                                                                                                                                                                                                                                                                                                                                                                                                                                                                                                         |  |
| 23 | Spliceosome                                 | 0.672132 | PAS_chr3_0325;PAS_chr1-3_0182;PAS_chr3_1252;PAS_chr3_0400;PAS_FragB_0004;PAS_chr4_0552;PAS_chr3_1041;PAS_chr1-3_0256;PAS_chr4_0670;PAS_chr3_0731;PAS_chr1-4_0686;PAS_chr1-1_0014;PAS_chr2-1_0455;PAS_chr2-1_0450;PAS_chr1-4_0614;PAS_chr4_0201;PAS_chr4_0942;PAS_chr2-1_0818;PAS_chr3_0642;PAS_chr3_0644;PAS_chr4_0538;PAS_chr2-1_0187;PAS_chr2-2_0424                                                                                                                                                                                |  |
| 3  | Cyanoamino acid metabolism                  | 0.689058 | PAS_chr4_0587;PAS_chr2-1_0037;PAS_chr3_0591                                                                                                                                                                                                                                                                                                                                                                                                                                                                                           |  |
| 5  | Tyrosine metabolism                         | 0.692816 | PAS_chr2-1_0472;PAS_chr4_0974;PAS_chr1-1_0200;PAS_chr3_1028;PAS_chr1-3_0024                                                                                                                                                                                                                                                                                                                                                                                                                                                           |  |
| 5  | Valine, leucine and isoleucine degradation  | 0.692816 | PAS_chr2-1_0191;PAS_chr4_0677;PAS_chr1-4_0304;PAS_chr2-1_0853;PAS_chr4_0043                                                                                                                                                                                                                                                                                                                                                                                                                                                           |  |
| 9  | Basal transcription factors                 | 0.915397 | PAS_chr1-4_0318;PAS_chr2-1_0838;PAS_chr1-1_0012;PAS_chr2-1_0277;PAS_chr3_0737;PAS_chr4_0745;PAS_chr4_0518;PAS_chr2-1_0043;PAS_chr2-1_0142                                                                                                                                                                                                                                                                                                                                                                                             |  |
| 3  | Vitamin B6                                  | 0.920535 | PAS_chr2-1_0273;PAS_chr4_0981;PAS_chr3_0566                                                                                                                                                                                                                                                                                                                                                                                                                                                                                           |  |

|    |                                                     |          |                                                                                                                                                                                                                                                                                                     |
|----|-----------------------------------------------------|----------|-----------------------------------------------------------------------------------------------------------------------------------------------------------------------------------------------------------------------------------------------------------------------------------------------------|
|    | metabolism                                          |          |                                                                                                                                                                                                                                                                                                     |
| 5  | Tryptophan metabolism                               | 0.943279 | PAS_chr1-4_0304;PAS_chr2-2_0131;PAS_chr2-1_0853;PAS_chr2-1_0037;PAS_chr4_0043                                                                                                                                                                                                                       |
| 1  | Carbapenem biosynthesis                             | 0.990189 | PAS_chr4_0665                                                                                                                                                                                                                                                                                       |
| 5  | Homologous recombination                            | 0.99417  | PAS_chr3_0224;PAS_chr4_0299;PAS_chr1-1_0242;PAS_FragB_0039;PAS_chr2-1_0153                                                                                                                                                                                                                          |
| 4  | Nicotinate and nicotinamide metabolism              | 0.994391 | PAS_chr1-1_0132;PAS_chr1-1_0374;PAS_chr1-3_0130;PAS_chr1-3_0024                                                                                                                                                                                                                                     |
| 4  | Steroid biosynthesis                                | 0.998876 | PAS_chr3_0053;PAS_chr1-4_0367;PAS_chr4_0198;PAS_chr1-4_0604                                                                                                                                                                                                                                         |
| 4  | Porphyrin and chlorophyll metabolism                | 0.998876 | PAS_chr4_0418;PAS_chr2-2_0293;PAS_chr3_0954;PAS_chr1-3_0194                                                                                                                                                                                                                                         |
| 8  | Meiosis - yeast                                     | 0.999831 | PAS_chr2-1_0061;PAS_chr3_0540;PAS_chr3_1078;PAS_chr2-1_0276;PAS_chr3_0477;PAS_chr4_0604;PAS_chr4_0603;PAS_FragB_0028                                                                                                                                                                                |
| 3  | Ascorbate and aldarate metabolism                   | 1        | PAS_chr4_0043;PAS_chr2-1_0853;PAS_chr2-1_0197                                                                                                                                                                                                                                                       |
| 9  | Phagosome                                           | 1        | PAS_chr3_0989;PAS_chr3_1040;PAS_chr1-3_0113;PAS_chr2-2_0227;PAS_chr1-4_0629;PAS_chr4_0990;PAS_chr1-1_0309;PAS_chr1-3_0202;PAS_chr2-1_0687                                                                                                                                                           |
| 5  | beta-Alanine metabolism                             | 1        | PAS_chr4_0677;PAS_chr4_0043;PAS_chr2-1_0853;PAS_chr4_0823;PAS_chr1-4_0198                                                                                                                                                                                                                           |
| 19 | Protein processing in endoplasmic reticulum         | 1        | PAS_chr4_0436;PAS_chr1-4_0130;PAS_chr1-3_0202;PAS_chr1-1_0367;PAS_chr3_0731;PAS_chr3_0480;PAS_chr1-4_0629;PAS_chr4_0552;PAS_chr4_0991;PAS_chr1-3_0174;PAS_chr4_0606;PAS_chr1-1_0180;PAS_chr2-1_0421;PAS_chr2-1_0042;PAS_chr1-1_0237;PAS_chr1-3_0289;PAS_chr2-2_0015;PAS_chr2-1_0753;PAS_chr1-4_0685 |
| 3  | Riboflavin metabolism                               | 1        | PAS_chr3_0167;PAS_chr3_1037;PAS_chr1-4_0151                                                                                                                                                                                                                                                         |
| 7  | N-Glycan biosynthesis                               | 1        | PAS_chr3_0552;PAS_chr3_0999;PAS_chr4_0264;PAS_chr2-1_0753;PAS_chr2-1_0759;PAS_chr1-1_0459;PAS_chr1-4_0685                                                                                                                                                                                           |
| 7  | Pyrimidine metabolism                               | 1        | PAS_chr3_0262;PAS_chr1-1_0132;PAS_chr3_0799;PAS_chr3_0349;PAS_chr4_0138;PAS_chr2-2_0059;PAS_chr2-1_0593                                                                                                                                                                                             |
| 2  | Other types of O-glycan biosynthesis                | 1        | PAS_chr2-1_0256;PAS_chr2-1_0212                                                                                                                                                                                                                                                                     |
| 5  | Propanoate metabolism                               | 1        | PAS_chr4_0677;PAS_chr1-4_0304;PAS_chr2-1_0313;PAS_chr3_0831;PAS_chr4_0336                                                                                                                                                                                                                           |
| 5  | Phosphatidylinositol signaling system               | 1        | PAS_chr4_0700;PAS_chr1-1_0005;PAS_chr1-4_0617;PAS_chr1-1_0457;PAS_chr2-1_0758                                                                                                                                                                                                                       |
| 5  | Phenylalanine, tyrosine and tryptophan biosynthesis | 1        | PAS_chr4_0974;PAS_chr3_0634;PAS_chr1-1_0200;PAS_chr2-1_0679;PAS_chr2-1_0637                                                                                                                                                                                                                         |
| 18 | Endocytosis                                         | 1        | PAS_chr2-2_0087;PAS_chr3_0150;PAS_chr2-1_0572;PAS_chr3_1165;PAS_chr2-1_0112;PAS_c131_0006;PAS_chr4_0635;PAS_chr4_0552;PAS_chr3_0238;PAS_chr1-3_0288;PAS_chr1-1_0457;PAS_chr3_0731;PAS_chr1-4_0023;PAS_chr1-3_0184;PAS_chr1-4_0340;PAS_chr3_0458;PAS_chr3_0312;PAS_chr1-1_0034                       |
| 1  | Phosphonate and phosphinate metabolism              | 1        | PAS_chr2-2_0401                                                                                                                                                                                                                                                                                     |
| 3  | Sulfur metabolism                                   | 1        | PAS_chr1-4_0253;PAS_chr4_0369;PAS_chr4_0330                                                                                                                                                                                                                                                         |
| 12 | Purine metabolism                                   | 1        | PAS_chr1-4_0253;PAS_chr1-4_0264;PAS_chr2-2_0329;PAS_chr2-1_0111;PAS_chr2-1_0101;PAS_chr1-1_0132;PAS_chr1-4_0450;PAS_chr1-3_0191;PAS_chr3_1138;PAS_chr3_0257;PAS_chr4_0613;PAS_chr2-2_0059                                                                                                           |
| 5  | Inositol phosphate metabolism                       | 1        | PAS_chr4_0700;PAS_chr1-4_0617;PAS_chr3_0951;PAS_chr1-1_0457;PAS_chr2-2_0113                                                                                                                                                                                                                         |
| 2  | Ubiquinone and other terpenoid-quinone biosynthesis | 1        | PAS_chr1-1_0169;PAS_chr2-2_0303                                                                                                                                                                                                                                                                     |
| 3  | Sphingolipid metabolism                             | 1        | PAS_chr3_0597;PAS_chr3_0399;PAS_chr4_0866                                                                                                                                                                                                                                                           |
| 10 | Peroxisome                                          | 1        | PAS_chr2-2_0131;PAS_chr4_0416;PAS_chr3_0099;PAS_chr2-1_0502;PAS_chr3_1073;PAS_chr2-1_0504;PAS_chr4_0786;PAS_chr1-4_0663;PAS_chr3_0043;PAS_chr1-1_0233                                                                                                                                               |

|    |                                                 |   |                                                                                                                                                                                                                                                                             |
|----|-------------------------------------------------|---|-----------------------------------------------------------------------------------------------------------------------------------------------------------------------------------------------------------------------------------------------------------------------------|
| 2  | Non-homologous end-joining                      | 1 | PAS_chr1-4_0116;PAS_chr1-4_0633                                                                                                                                                                                                                                             |
| 5  | Starch and sucrose metabolism                   | 1 | PAS_chr3_0781;PAS_chr1-4_0426;PAS_chr1-4_0264;PAS_chr4_0847;PAS_chr4_0624                                                                                                                                                                                                   |
| 2  | Galactose metabolism                            | 1 | PAS_chr1-4_0264;PAS_chr4_0624                                                                                                                                                                                                                                               |
| 3  | Folate biosynthesis                             | 1 | PAS_chr4_0940;PAS_chr2-2_0084;PAS_chr1-4_0678                                                                                                                                                                                                                               |
| 1  | Biotin metabolism                               | 1 | PAS_chr1-3_0016                                                                                                                                                                                                                                                             |
| 3  | Base excision repair                            | 1 | PAS_chr2-2_0280;PAS_chr1-4_0633;PAS_chr1-3_0055                                                                                                                                                                                                                             |
| 6  | Longevity regulating pathway - multiple species | 1 | PAS_chr2-2_0131;PAS_chr4_0552;PAS_chr4_0786;PAS_chr3_0731;PAS_chr1-1_0374;PAS_chr2-1_0324                                                                                                                                                                                   |
| 1  | Ether lipid metabolism                          | 1 | PAS_chr2-2_0063                                                                                                                                                                                                                                                             |
| 11 | RNA degradation                                 | 1 | PAS_chr4_0229;PAS_chr2-1_0266;PAS_chr4_0158;PAS_chr4_0224;PAS_chr3_0753;PAS_chr3_1042;PAS_chr1-3_0256;PAS_chr3_0603;PAS_chr3_0956;PAS_chr3_0082;PAS_chr1-1_0014                                                                                                             |
| 4  | Glutathione metabolism                          | 1 | PAS_chr3_0277;PAS_chr1-1_0433;PAS_chr1-1_0233;PAS_chr3_0906                                                                                                                                                                                                                 |
| 5  | Various types of N-glycan biosynthesis          | 1 | PAS_chr3_0620;PAS_chr1-4_0037;PAS_chr2-1_0753;PAS_chr2-1_0759;PAS_chr1-4_0685                                                                                                                                                                                               |
| 5  | Glycerolipid metabolism                         | 1 | PAS_chr2-1_0279;PAS_chr4_0043;PAS_chr2-1_0853;PAS_chr3_0006;PAS_chr4_0938                                                                                                                                                                                                   |
| 2  | Sulfur relay system                             | 1 | PAS_chr1-4_0547;PAS_chr2-2_0373                                                                                                                                                                                                                                             |
| 2  | One carbon pool by folate                       | 1 | PAS_chr2-2_0145;PAS_chr4_0587                                                                                                                                                                                                                                               |
| 2  | Histidine metabolism                            | 1 | PAS_chr4_0043;PAS_chr2-1_0853                                                                                                                                                                                                                                               |
| 2  | Phenylalanine metabolism                        | 1 | PAS_chr4_0974;PAS_chr1-1_0200                                                                                                                                                                                                                                               |
| 8  | Ubiquitin mediated proteolysis                  | 1 | PAS_chr3_1078;PAS_chr2-1_0369;PAS_chr3_0359;PAS_chr3_0477;PAS_chr4_0436;PAS_chr3_0709;PAS_chr3_0722;PAS_FragB_0055                                                                                                                                                          |
| 1  | Hippo signaling pathway - multiple species      | 1 | PAS_chr1-4_0419                                                                                                                                                                                                                                                             |
| 4  | RNA polymerase                                  | 1 | PAS_chr3_0244;PAS_chr2-2_0434;PAS_chr1-4_0359;PAS_chr4_0925                                                                                                                                                                                                                 |
| 12 | Ribosome biogenesis in eukaryotes               | 1 | PAS_chr1-4_0403;PAS_chr2-1_0387;PAS_chr2-1_0449;PAS_chr2-1_0781;PAS_chr3_0112;PAS_chr4_0278;PAS_chr1-4_0640;PAS_chr2-1_0648;PAS_chr3_1041;PAS_chr3_0885;PAS_chr1-1_0377;PAS_chr3_0681                                                                                       |
| 7  | mRNA surveillance pathway                       | 1 | PAS_chr2-2_0133;PAS_chr1-1_0015;PAS_chr2-1_0414;PAS_chr2-1_0528;PAS_chr1-3_0074;PAS_chr2-1_0232;PAS_chr2-1_0233                                                                                                                                                             |
| 1  | Fatty acid biosynthesis                         | 1 | PAS_chr1-3_0016                                                                                                                                                                                                                                                             |
| 10 | Nucleocytoplasmic transport                     | 1 | PAS_chr4_0719;PAS_chr2-1_0617;PAS_chr2-1_0528;PAS_chr3_0431;PAS_chr2-1_0449;PAS_chr4_0551;PAS_chr3_0312;PAS_FragB_0052;PAS_chr3_0400;PAS_chr1-3_0074                                                                                                                        |
| 18 | Cell cycle - yeast                              | 1 | PAS_chr2-1_0061;PAS_chr3_0540;PAS_chr4_0436;PAS_chr2-1_0276;PAS_chr2-1_0088;PAS_chr2-1_0627;PAS_chr3_0477;PAS_chr4_0604;PAS_chr3_1078;PAS_chr2-1_0092;PAS_chr3_0968;PAS_chr4_0603;PAS_chr4_0129;PAS_FragB_0028;PAS_chr3_1186;PAS_chr1-4_0419;PAS_FragD_0025;PAS_chr2-2_0298 |
| 5  | Nucleotide excision repair                      | 1 | PAS_chr2-1_0043;PAS_chr4_0436;PAS_chr2-1_0629;PAS_chr4_0745;PAS_chr2-1_0702                                                                                                                                                                                                 |
| 5  | Aminoacyl-tRNA biosynthesis                     | 1 | PAS_chr2-1_0396;PAS_chr2-2_0238;PAS_chr1-4_0463;PAS_chr2-2_0209;PAS_chr3_1110                                                                                                                                                                                               |
| 14 | MAPK signaling pathway - yeast                  | 1 | PAS_chr3_0299;PAS_chr2-2_0131;PAS_chr4_0584;PAS_chr2-2_0111;PAS_chr4_0986;PAS_chr2-1_0112;PAS_chr2-1_0117;PAS_chr3_0968;PAS_chr1-3_0149;PAS_chr4_0336;PAS_chr1-1_0201;PAS_chr1-1_0457;PAS_chr4_0123;PAS_chr3_0150                                                           |
| 1  | ABC                                             | 1 | PAS_chr2-1_0613                                                                                                                                                                                                                                                             |

---

|   |                                |   |                                                                                                                                         |
|---|--------------------------------|---|-----------------------------------------------------------------------------------------------------------------------------------------|
|   | transporters                   |   |                                                                                                                                         |
| 3 | DNA replication                | 1 | PAS_chr1-1_0049;PAS_chr1-4_0633;PAS_chr1-1_0474                                                                                         |
| 3 | Glycerophospholipid metabolism | 1 | PAS_chr2-2_0401;PAS_chr2-2_0111;PAS_chr2-2_0063                                                                                         |
| 3 | Mitophagy - yeast              | 1 | PAS_chr3_0263;PAS_chr1-4_0614;PAS_chr1-1_0457                                                                                           |
| 1 | Autophagy - other              | 1 | PAS_chr1-4_0119                                                                                                                         |
| 9 | Autophagy - yeast              | 1 | PAS_chr3_1087;PAS_chr2-1_0672;PAS_chr3_0210;PAS_chr3_0238;PAS_chr1-4_0606;PAS_chr1-4_0119;PAS_chr2-1_0574;PAS_chr1-4_0548;PAS_chr3_0458 |

---
